# Supplementary material for: Enantioselective organocatalytic Michael additions of N,N′-dialkylbarbituric acids to enones
Source: Royal Society of Chemistry journal article supplement (doi:10.1039/c7ob02116j), 2017-01-01

## **Enantioselective Organocatalytic Michael Additions of *N,N'*-Dialkylbarbituric Acids to Enones**

Ying Liu, Yongna Zhang,\* Hui-Xin Duan, Dong-Yan Wanyan and You-Qing Wang\*

*Provincial Key Laboratory of Polyoxometalate Chemistry, Provincial Key Laboratory of Natural Medicine and Immuno-Engineering, College of Chemistry and Chemical Engineering, Henan University, Kaifeng, Henan 475004, P. R. China.*

*Fax: (+86)-371-22864665; E-mail: zhangyongna@henu.edu.cn;*

*wyouqing@hotmail.com*

### **Supporting Information**

|                                                      |               |
|------------------------------------------------------|---------------|
| <b>Copy of NMR for New Compounds .....</b>           | <b>S2-37</b>  |
| <b>Copy of HPLC for Chiral Michael Products.....</b> | <b>S38-55</b> |
| <b>Copy of HRMS for New Compounds .....</b>          | <b>S56</b>    |

# Copy of NMR for New Compounds

1y-2-76-H CDCL3 300M

7.5029  
7.4802  
7.2589  
7.2374

3.9691

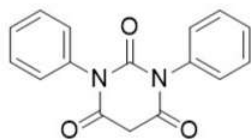

**1c**

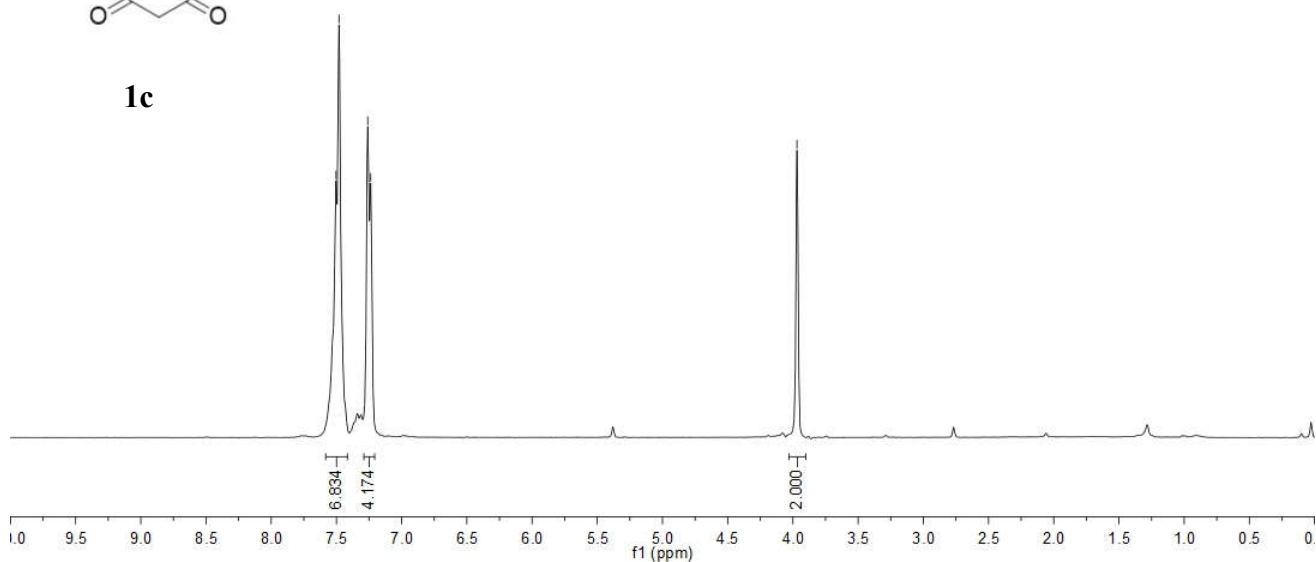

LY-2-73-C 75M CDCL3

164.4889

151.2340

133.8907

129.5062

129.3545

126.3734

77.5559

77.1320

76.7078

40.3910

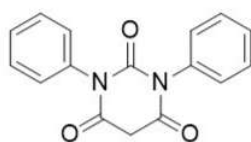

**1c**

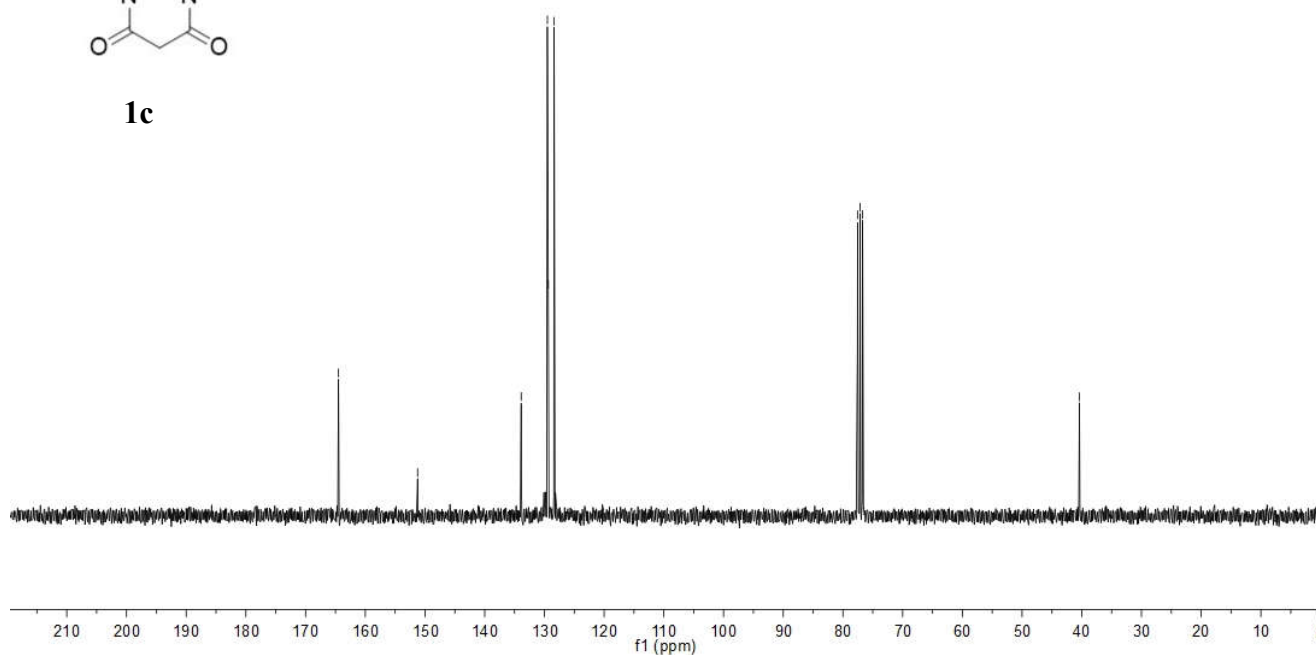

LY-2-60 CDCL3 300M

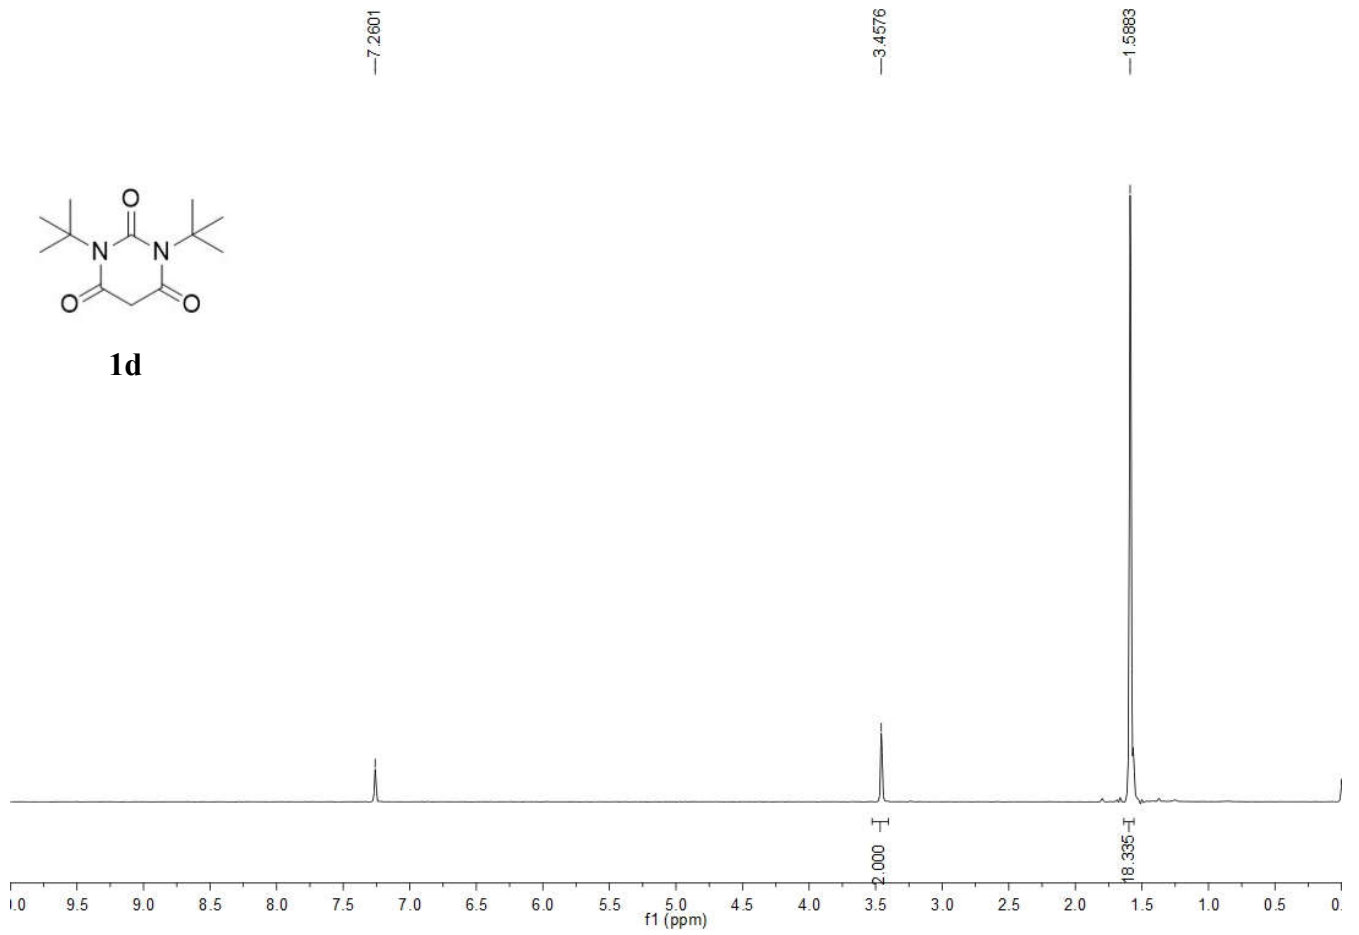

LY-2-60-C CDCL3 75M

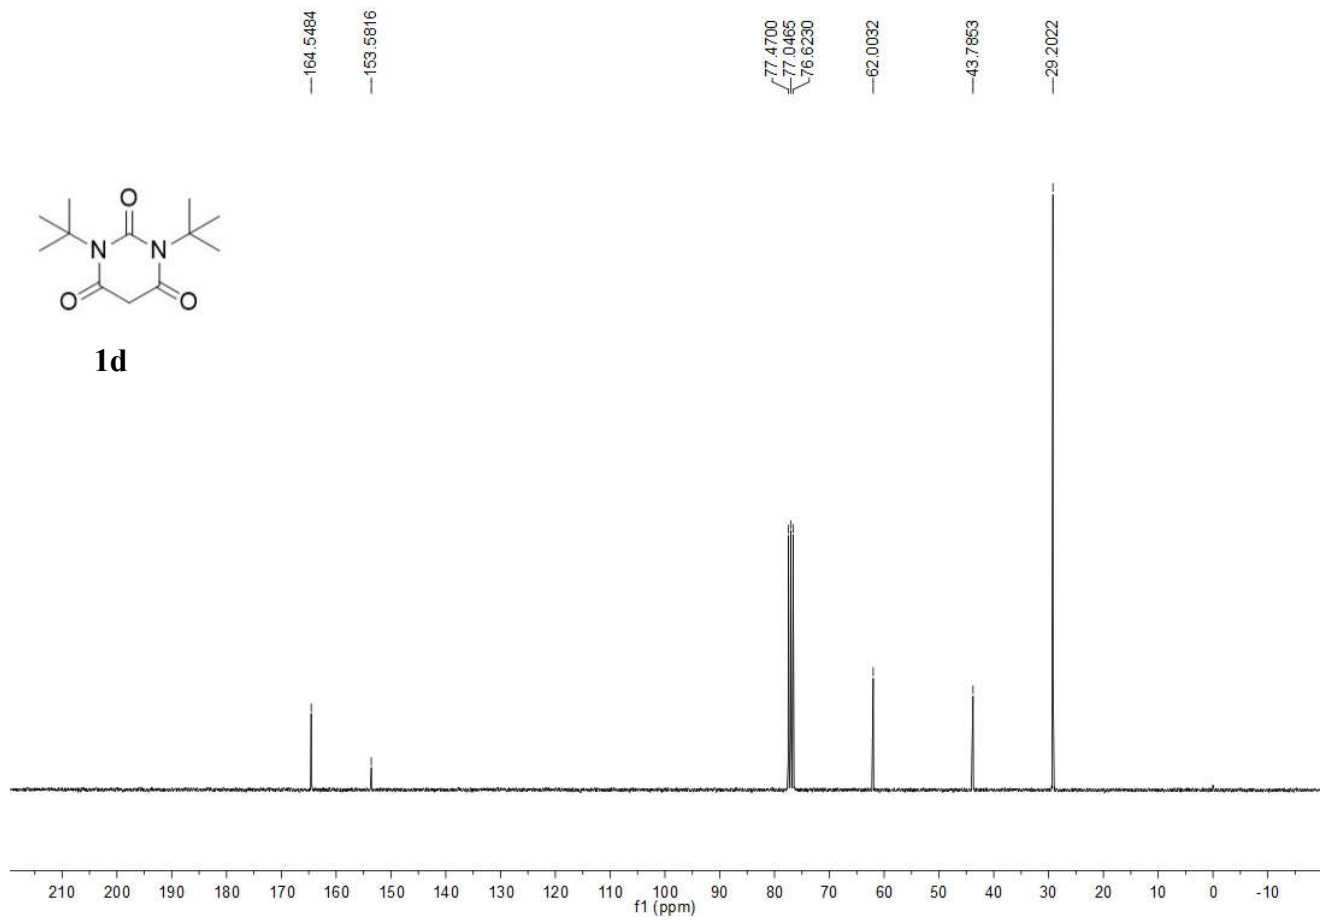

LY-2-36-H CDCL3 300M

8.0309  
8.0068  
7.5807  
7.4984  
7.4488  
7.2604  
7.1024

4.3607  
4.0714  
3.9893  
3.5693  
3.5521  
3.5094  
3.4919  
3.1131  
3.0508

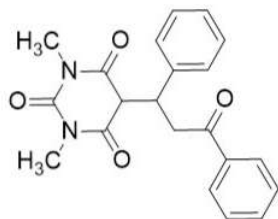

3a

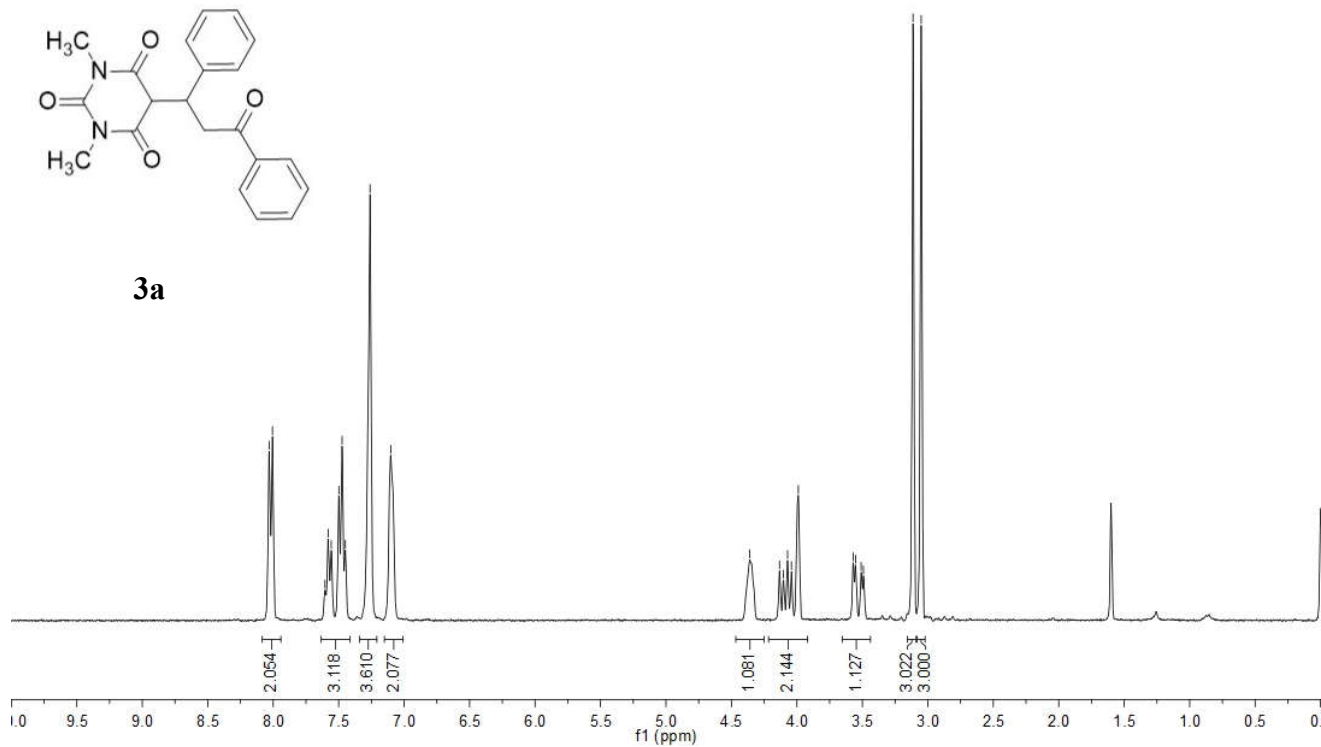

LY-3-36-C CDCL3 75M

197.6960

168.3404  
167.8233

150.9923

138.1793

136.7607

133.3788

128.7294

128.6845

128.3768

128.0915

127.3660

77.4839

77.0603

76.6366

53.0365

44.4577

40.3561

28.1380

28.0270

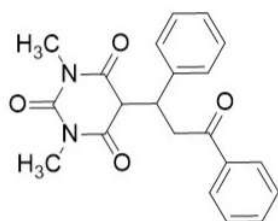

3a

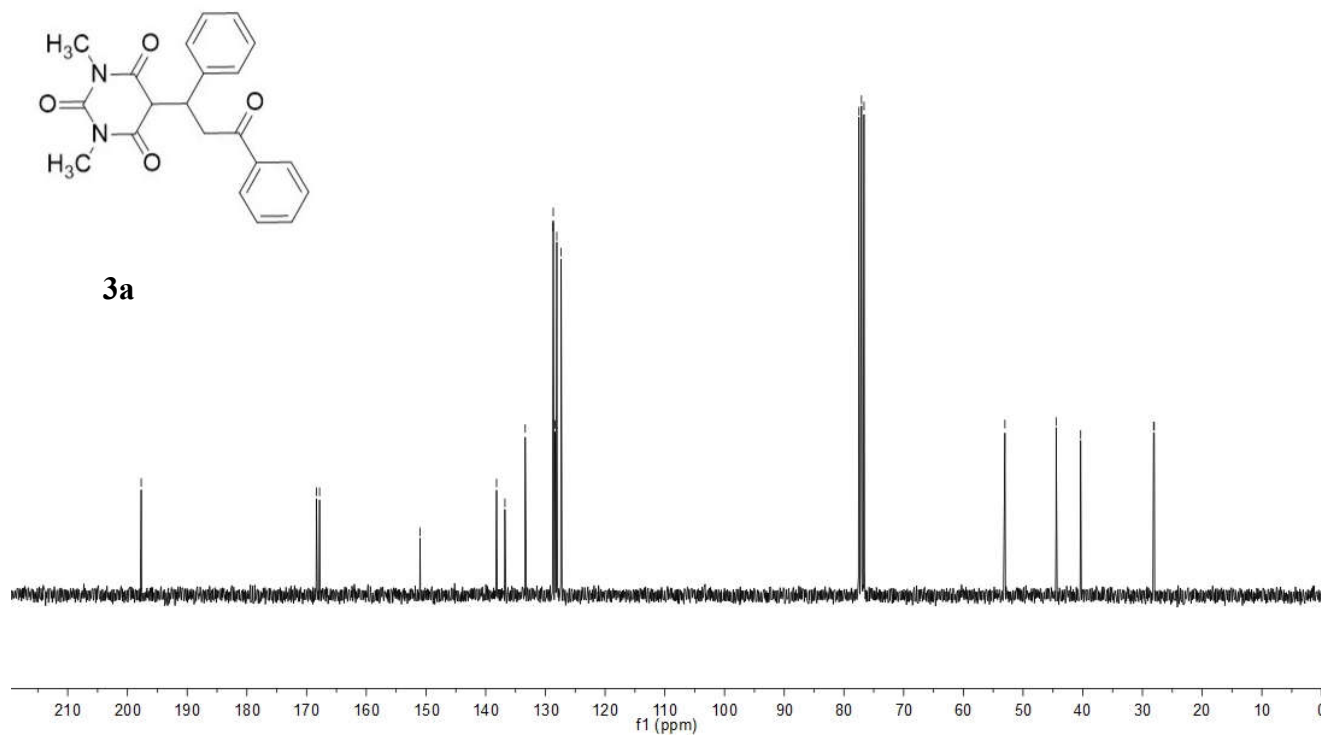

LY-2-67 300M NMR CDCl3

8.1212  
8.0964  
7.5825  
7.5581  
7.5336  
7.3361  
7.2599

4.6310  
4.5921  
4.5524  
4.5144  
4.4649  
4.1372  
3.9900  
3.6686  
3.6508  
3.6094  
3.5902

2.2601  
2.2206  
2.1804  
2.1427  
2.1107  
1.8643  
1.7080  
1.5983  
1.5185  
1.4014  
1.3567  
1.3215  
1.2758  
1.2372

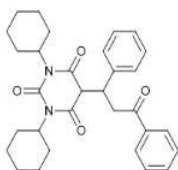

3b

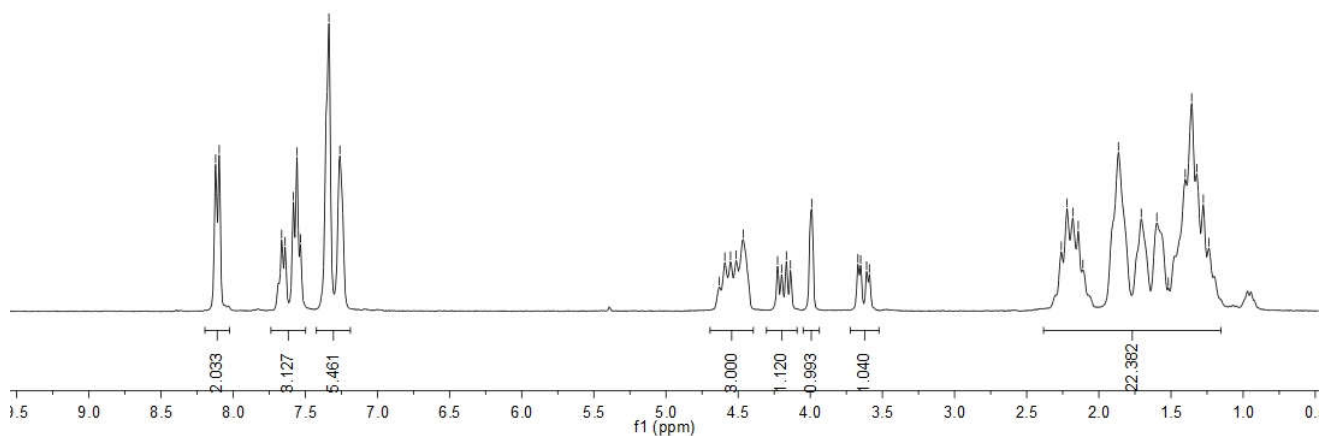

ly-2-67 75M NMR CDCl3

197.7665

168.5255  
168.1062

150.4573

138.3193

136.8463

133.2796

128.7797

128.6489

128.1012

77.4908

77.0673

76.6439

55.1483

55.0560

52.8640

44.2575

41.0445

29.0869

28.9836

28.7021

28.5889

26.4239

26.3575

26.2996

26.2552

25.1920

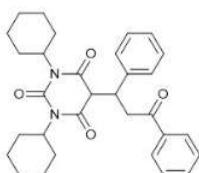

3b

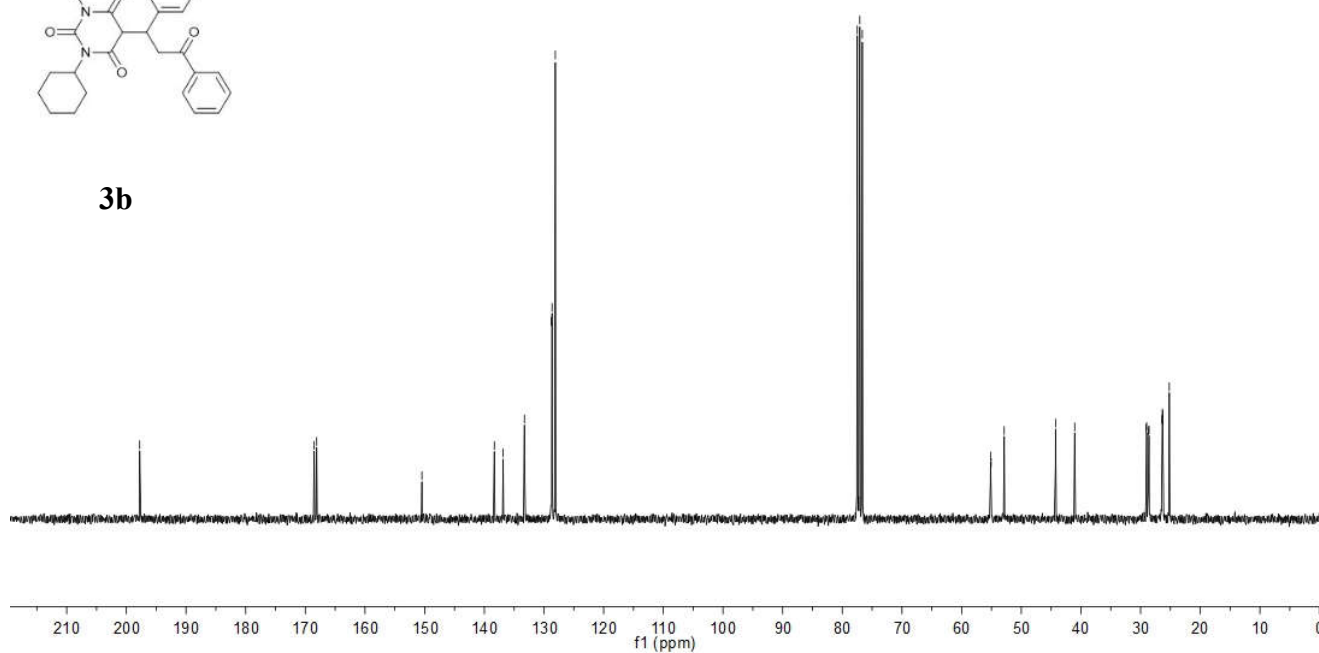

1y-2-75 300M NMR CDCL3

8.0096  
7.9842  
7.4689  
7.4434  
7.4146  
7.3891  
7.1318  
7.1088  
6.9124

4.5704  
4.2228  
4.1604  
4.1300  
3.6424  
3.6254  
3.5802  
3.5642

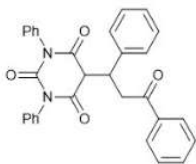

3c

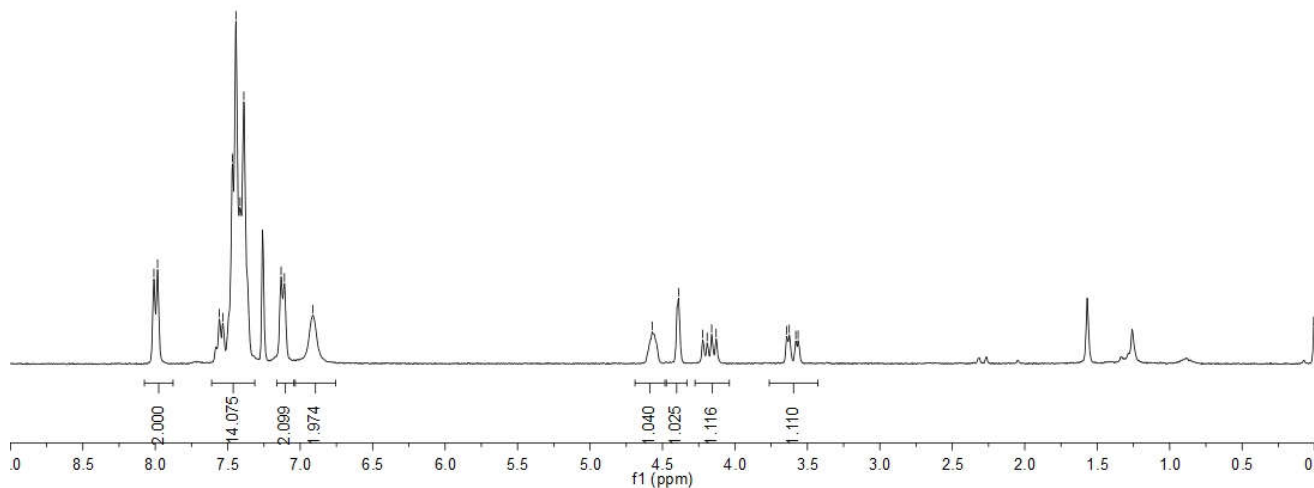

1y-2-77 75M NMR CDC13

197.9750  
167.8325  
167.7176  
150.4420  
138.8697  
136.6719  
133.9062  
133.4276  
129.3505  
129.2616  
129.2080  
129.0924  
128.6645  
128.2883  
128.2582  
128.1127  
77.4753  
77.0518  
76.6284  
52.8603  
44.3475  
40.6697

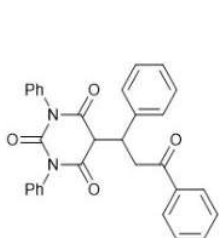

3c

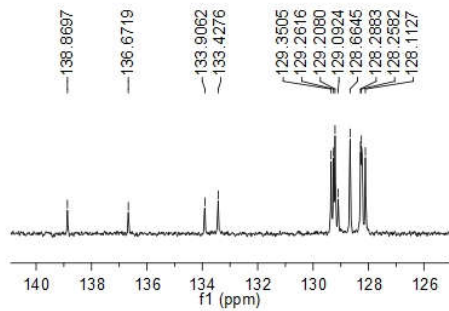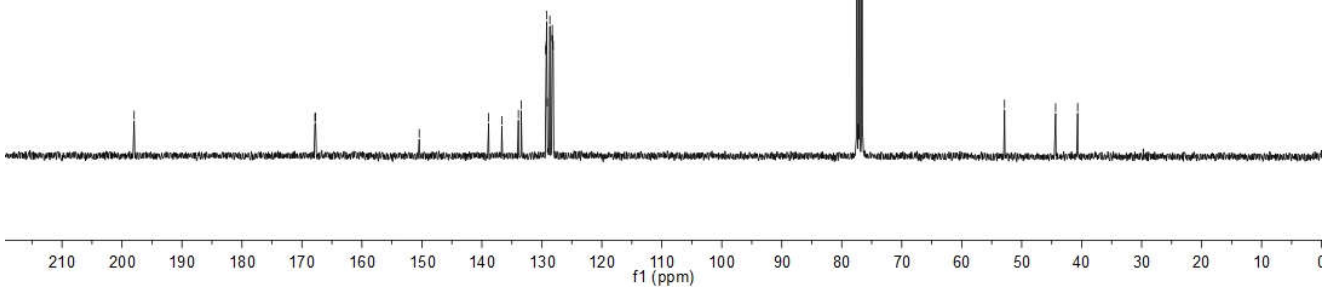

1y-2-75 NMR CDCl3

7.9615  
7.9369  
7.4918  
7.4144  
7.3650  
7.2004  
7.1358

4.2256  
3.9688  
3.6571  
3.6480  
3.5622  
3.5416  
3.5010  
3.4823

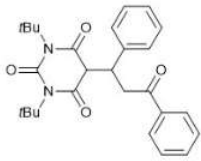

4a

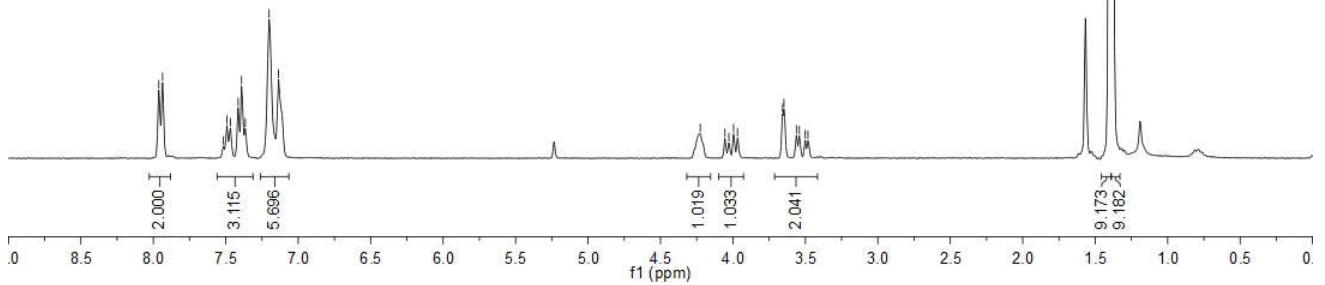

1y-2-75M 75M NMR CDCl3

197.7340

167.6558  
167.0646

152.4934

136.3754

136.9377

133.1535

128.8372

128.5886

128.3391

128.1253

77.4609

77.0376

76.6142

61.9889

61.9474

55.5195

43.6349

41.2925

29.0822

29.0141

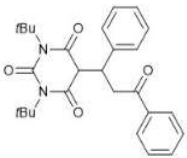

4a

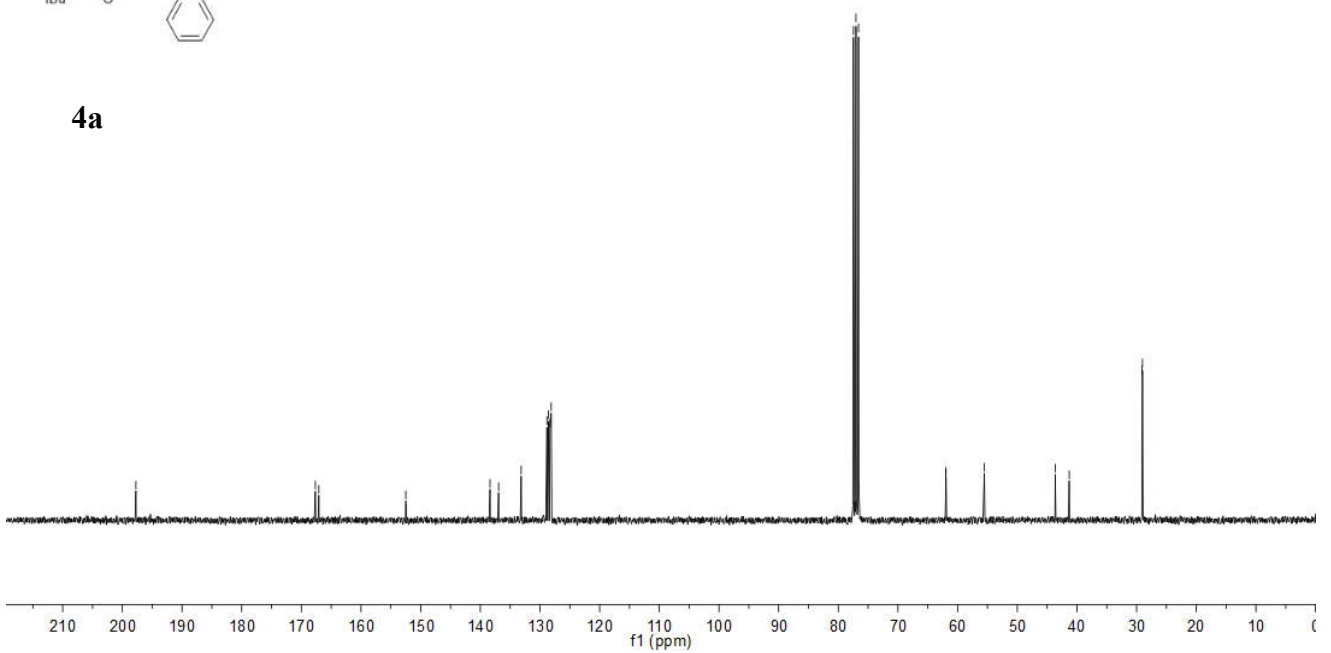

LY-3-5 1H CDCl3 NMR 300M

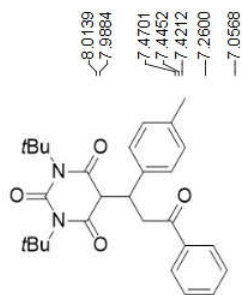

4b

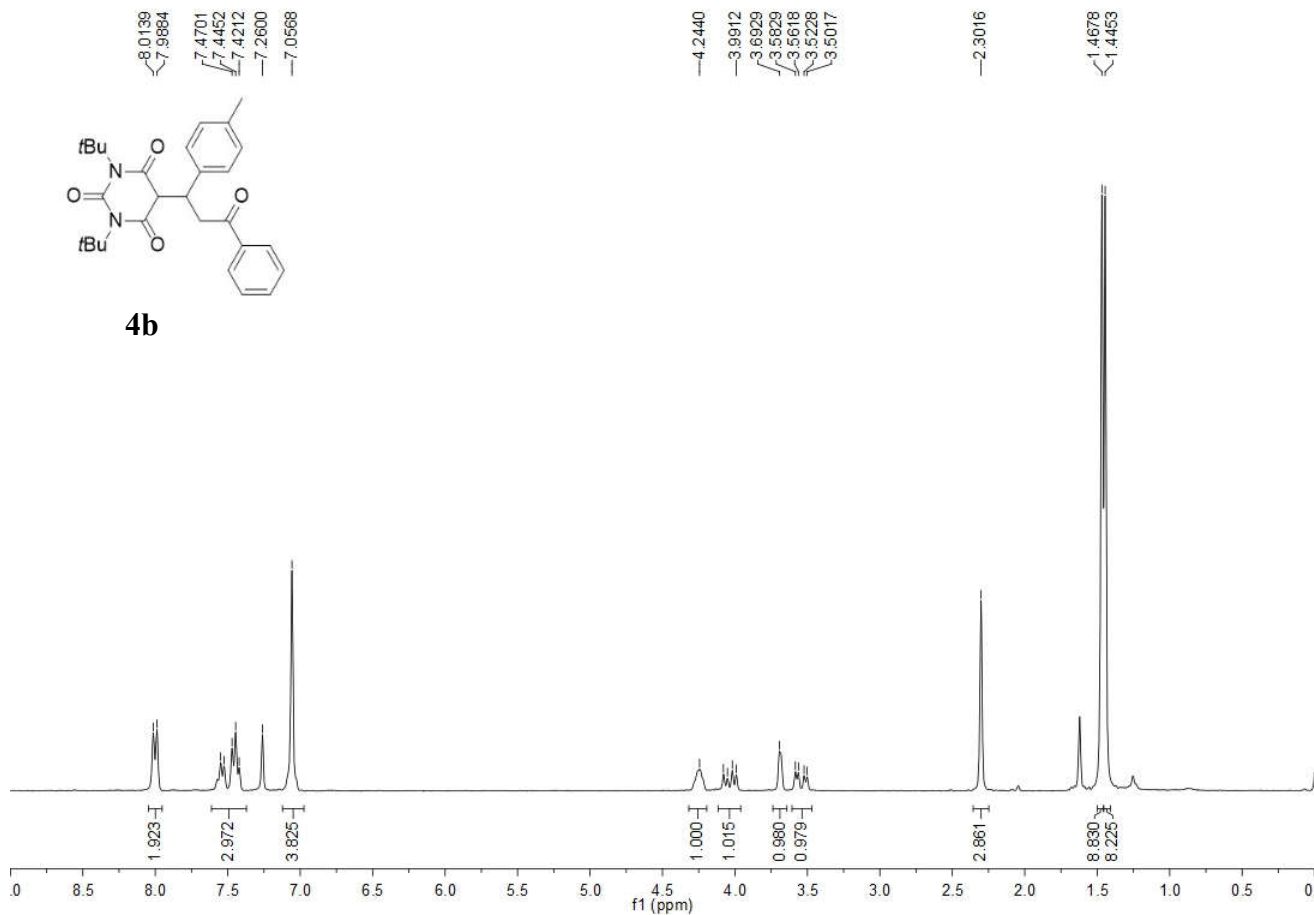

1y-3-5 75M NMR CDCl3

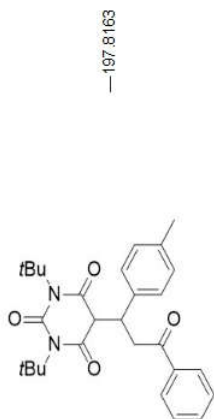

4b

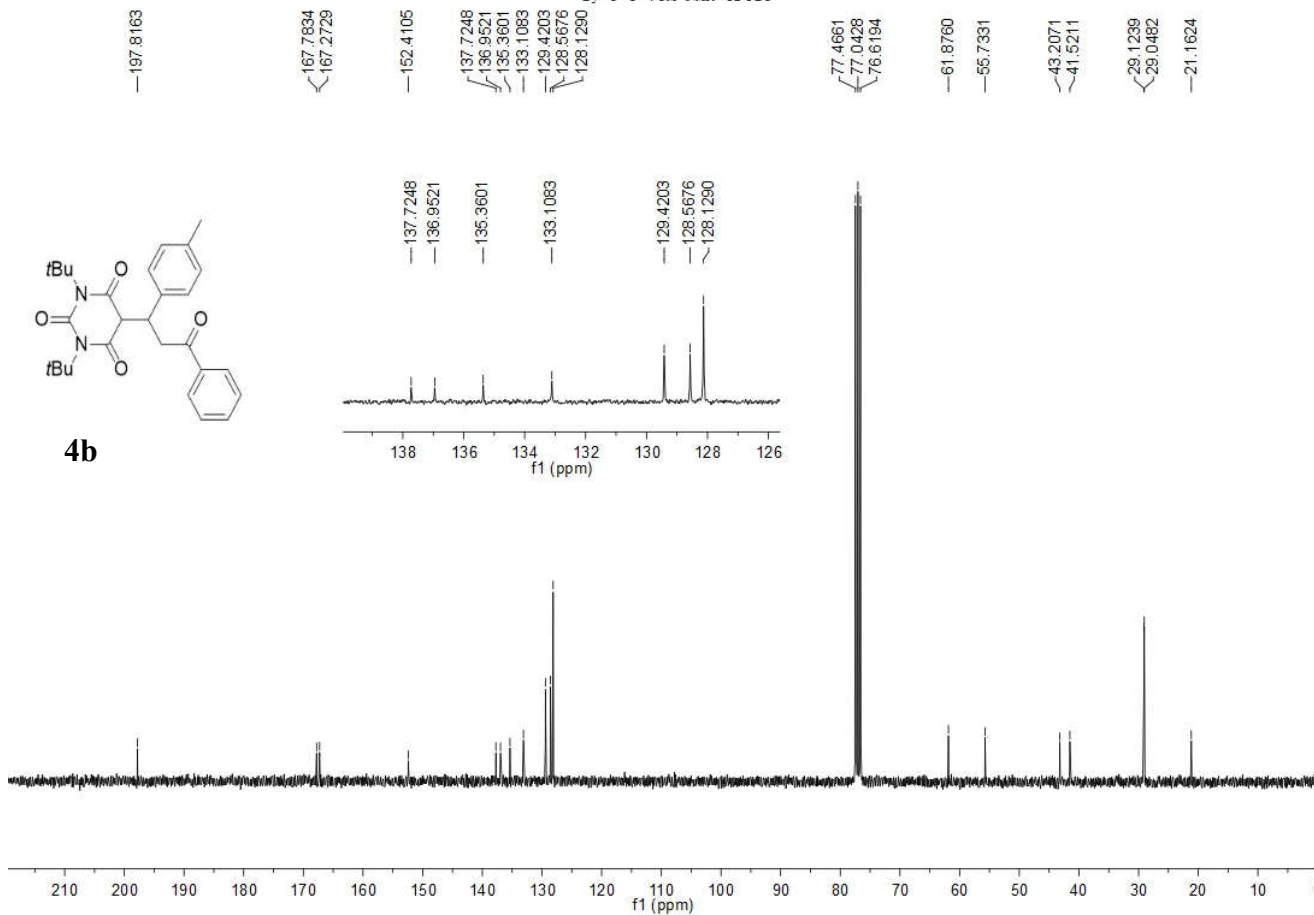



1y-2-94 300M NMR CDCL3

8.0151  
7.9900  
7.5507  
7.4724  
7.4229  
7.2604  
7.0824  
6.7827  
6.7547

4.2396  
3.9722  
3.7649  
3.6755  
3.6630  
3.5927  
3.5710  
3.5316  
3.5102

1.4708  
1.4529

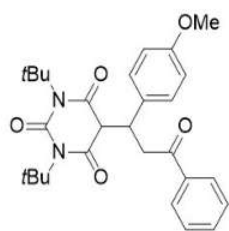

4c

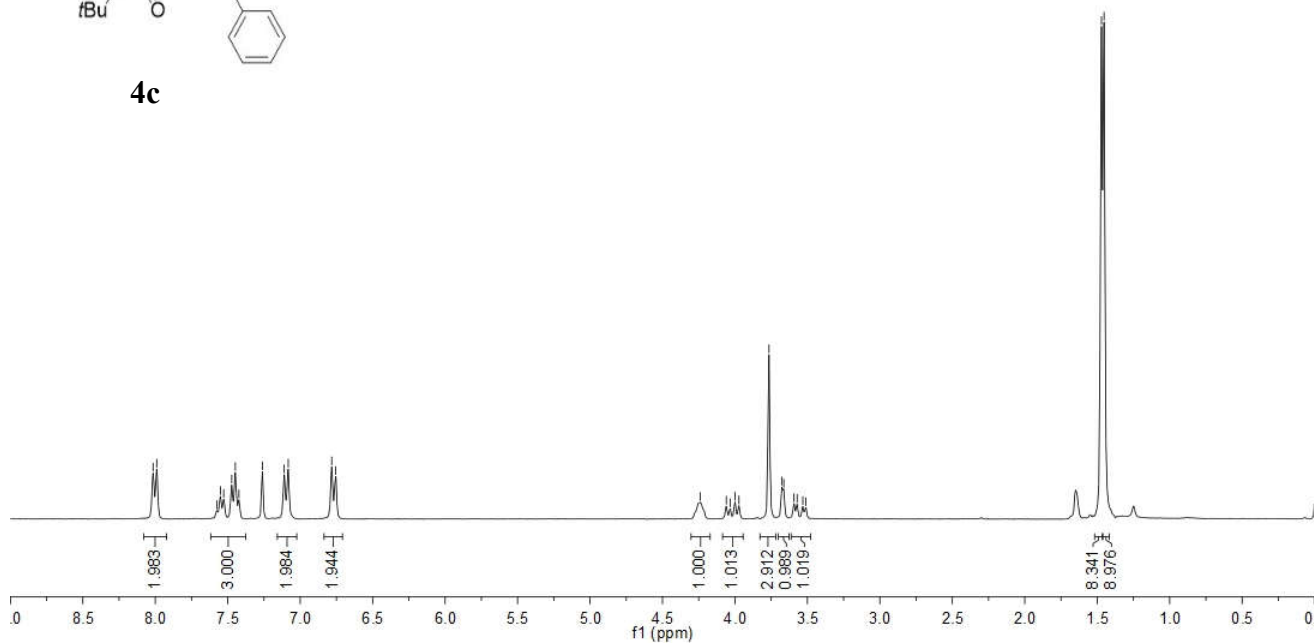

1y-2-94 75M NMR CDC13

197.7978  
167.7999  
167.2092  
159.3566  
152.3463

136.9331  
133.1338

129.3674  
128.5813  
128.1273

114.1157

77.4764  
77.0530  
76.6295

61.8831  
61.8488

55.8580  
55.3394

42.9440  
41.5921

29.1123  
29.0447

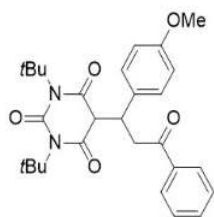

4c

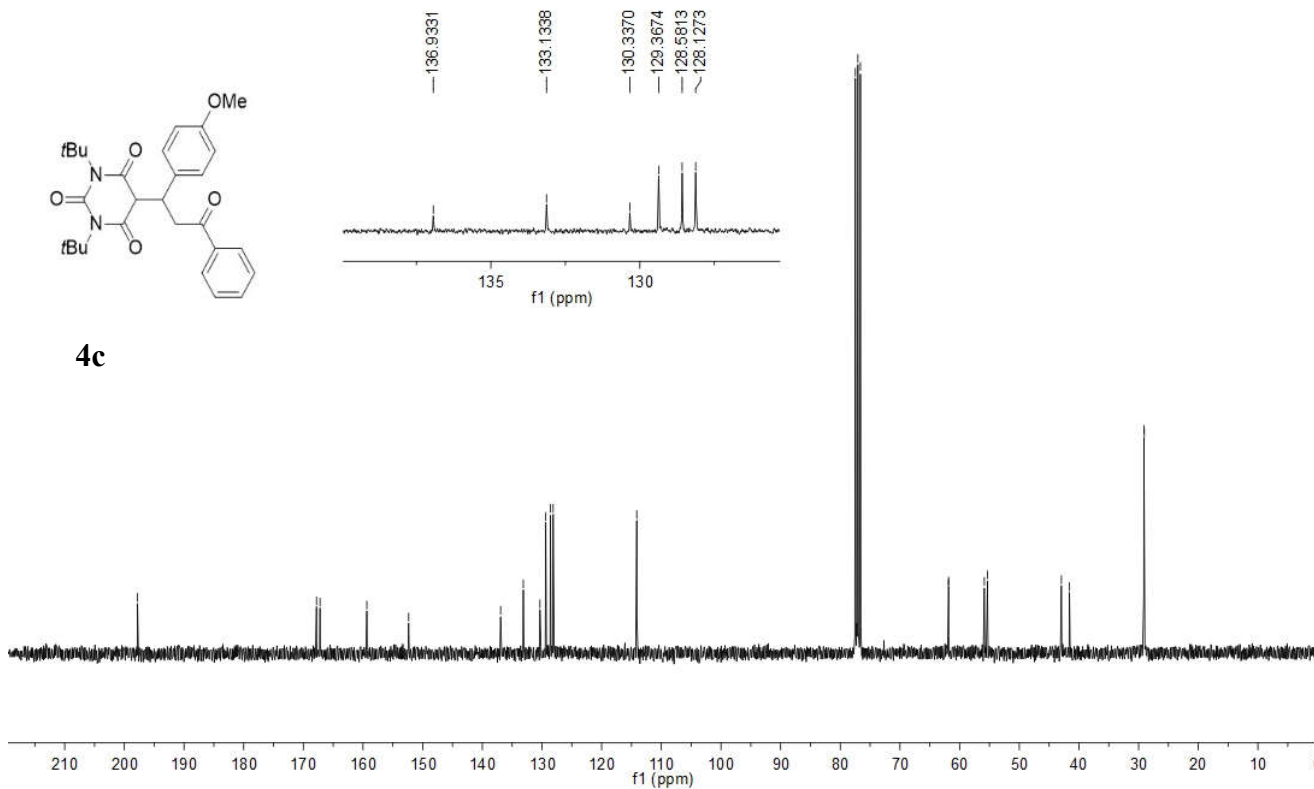

LY-2-93 300M NMR CDCL3

8.0119  
7.9866  
7.5500  
7.4714  
7.4223  
7.2601

6.7294  
6.7060

4.2406  
3.9740  
3.8315  
3.8131  
3.6964  
3.6866  
3.5985  
3.5782  
3.5377  
3.5160

1.4751  
1.4508

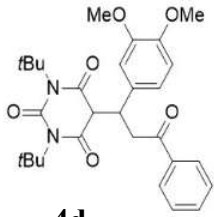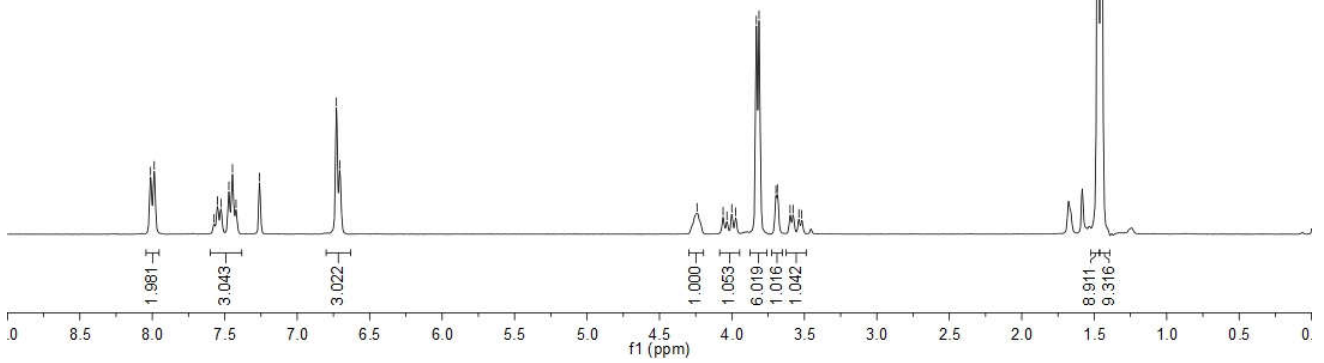

LY-2-93 75 NMR CDC13

197.9082  
167.8089  
167.3475

152.3244  
146.7908

136.9486  
133.1546

128.5911  
128.1204  
120.2014

111.9273  
111.3638

77.4791  
77.0557  
76.6320

61.8215  
61.7864

55.8554  
55.7826

43.0844  
41.7753

29.1291  
29.0513

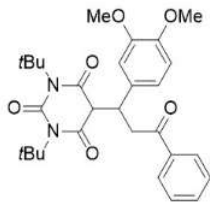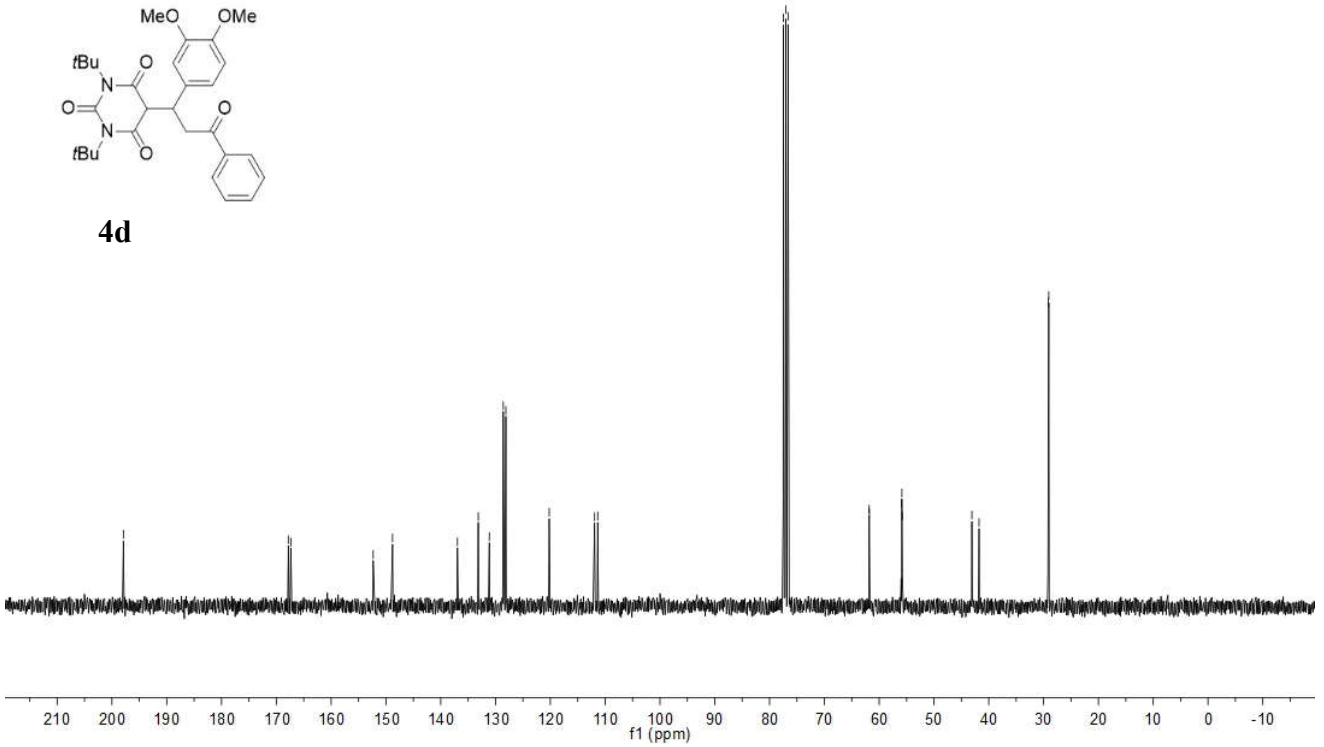

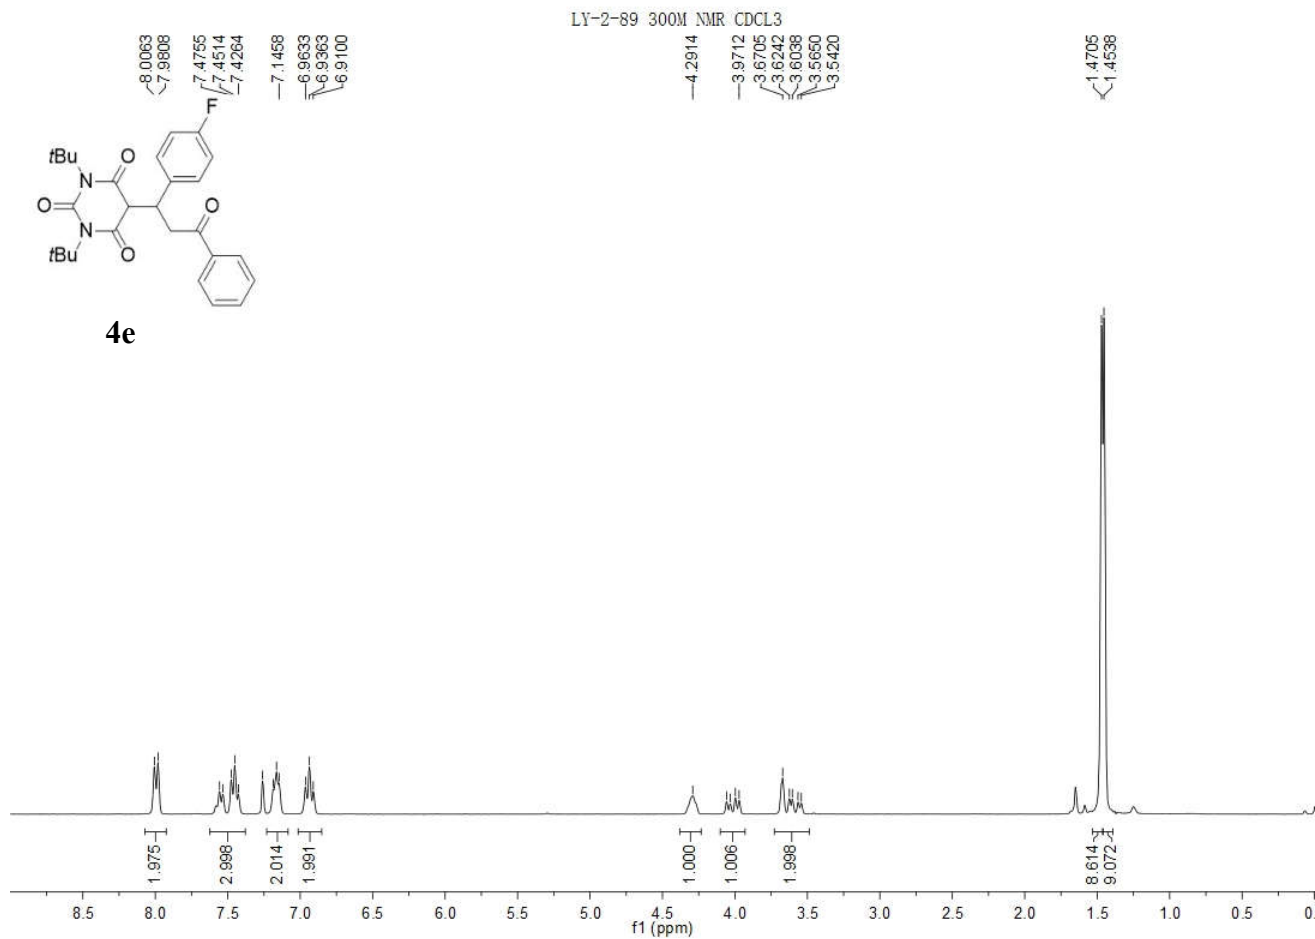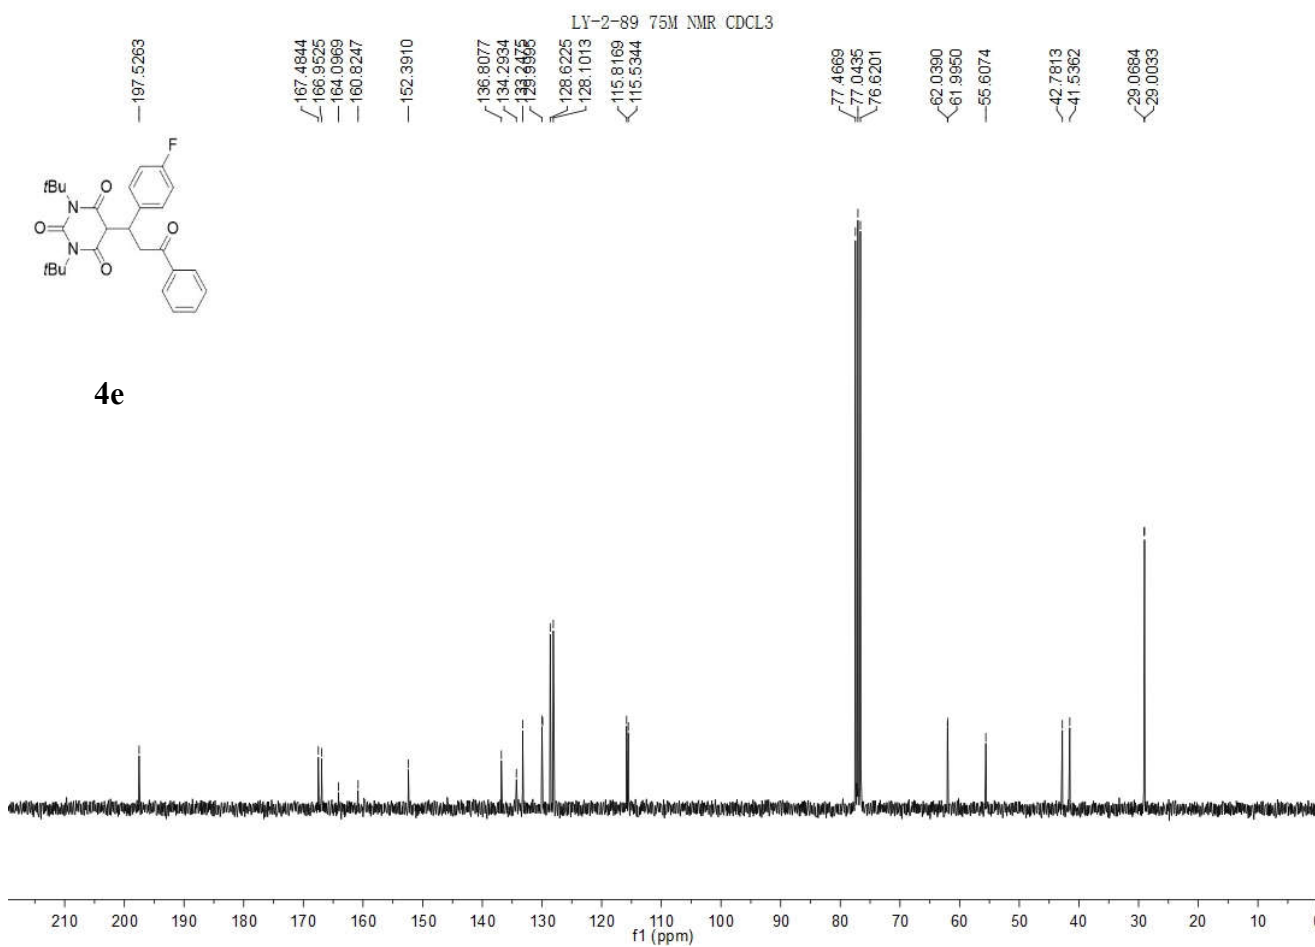

LY-2-87 300M NMR CDCL3

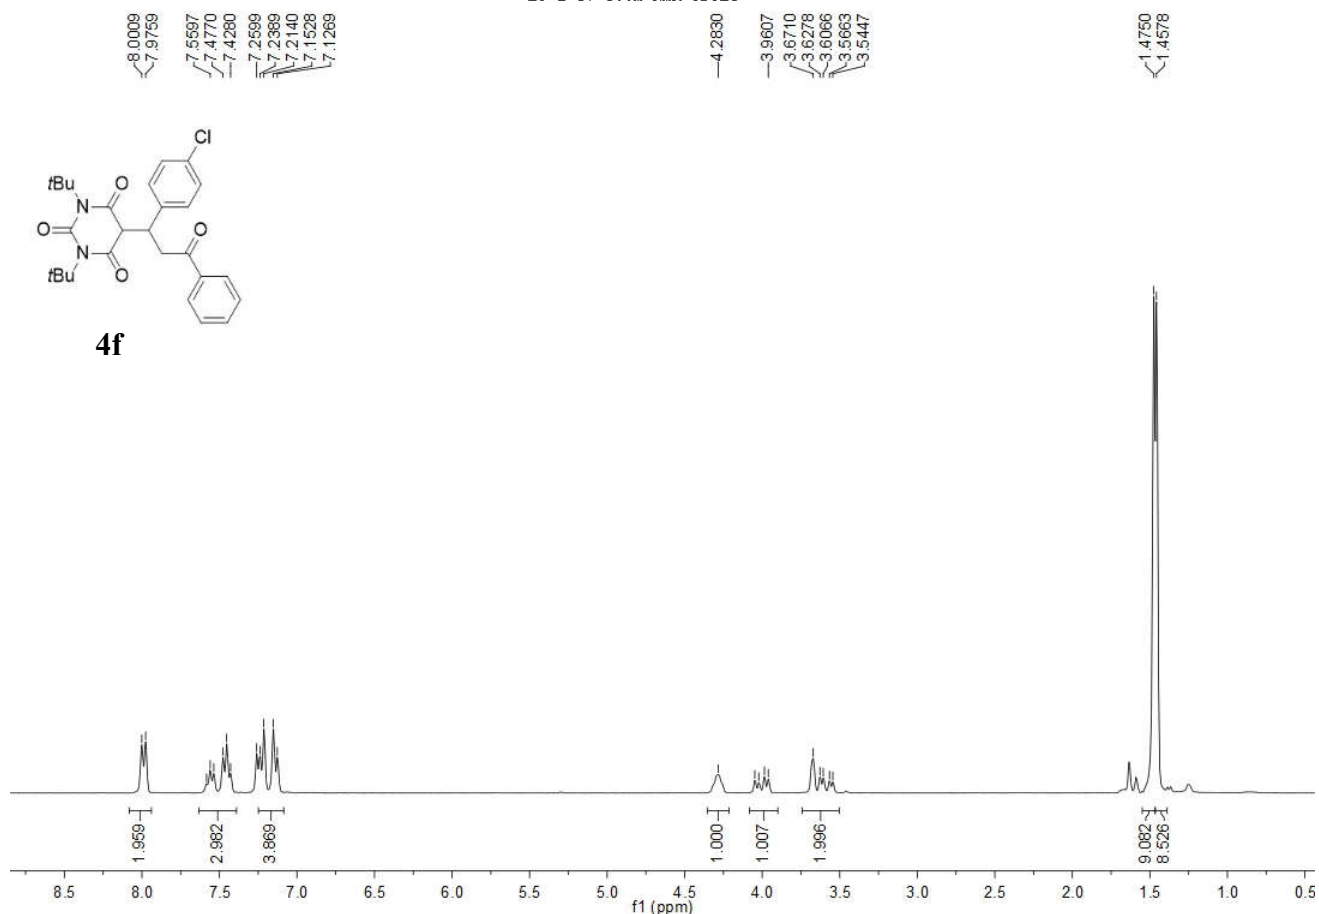

LY-2-87 75M NMR CDCL3

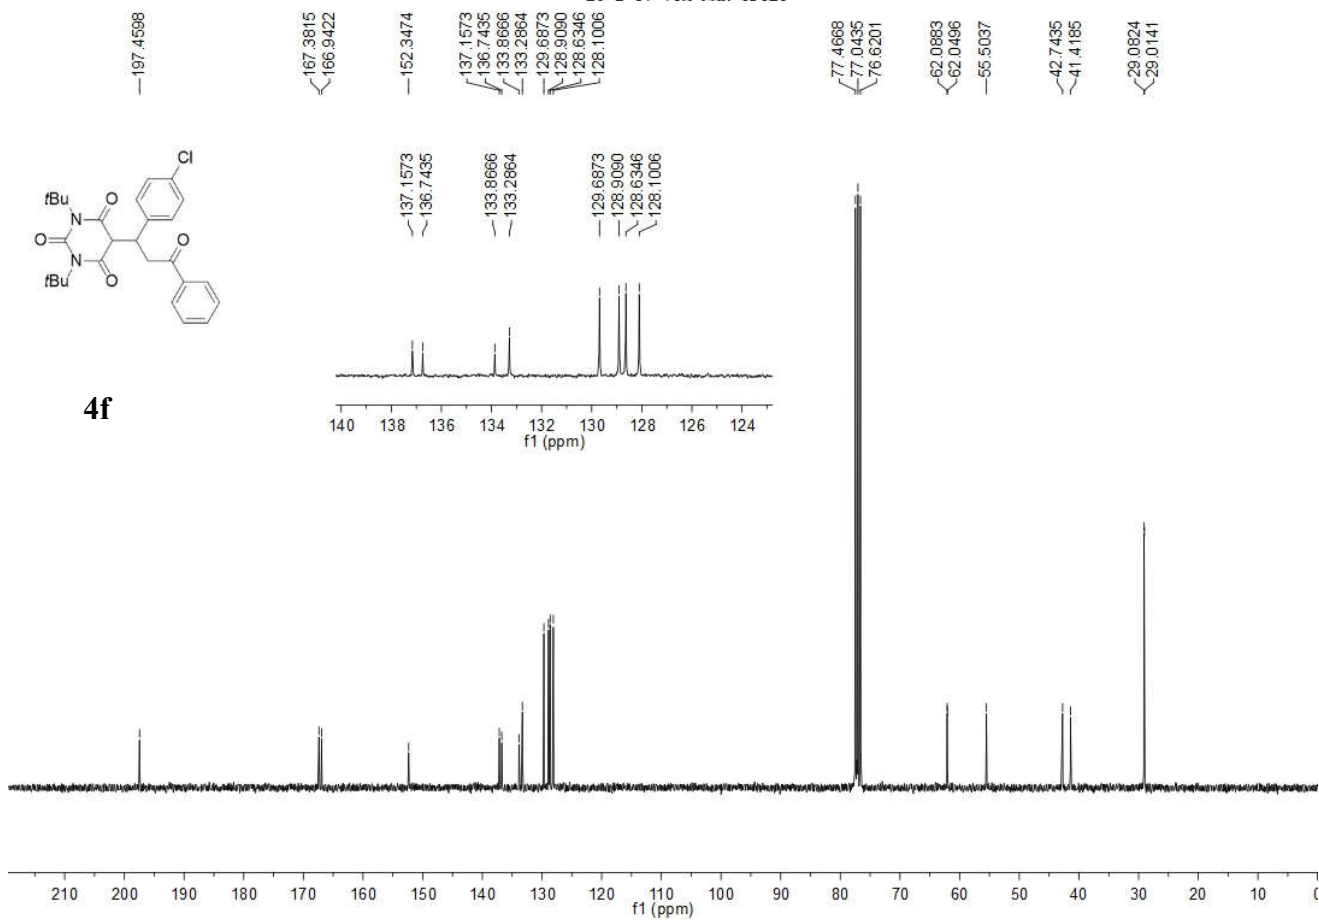

LY-3-13-1 300M NMR CDCL3

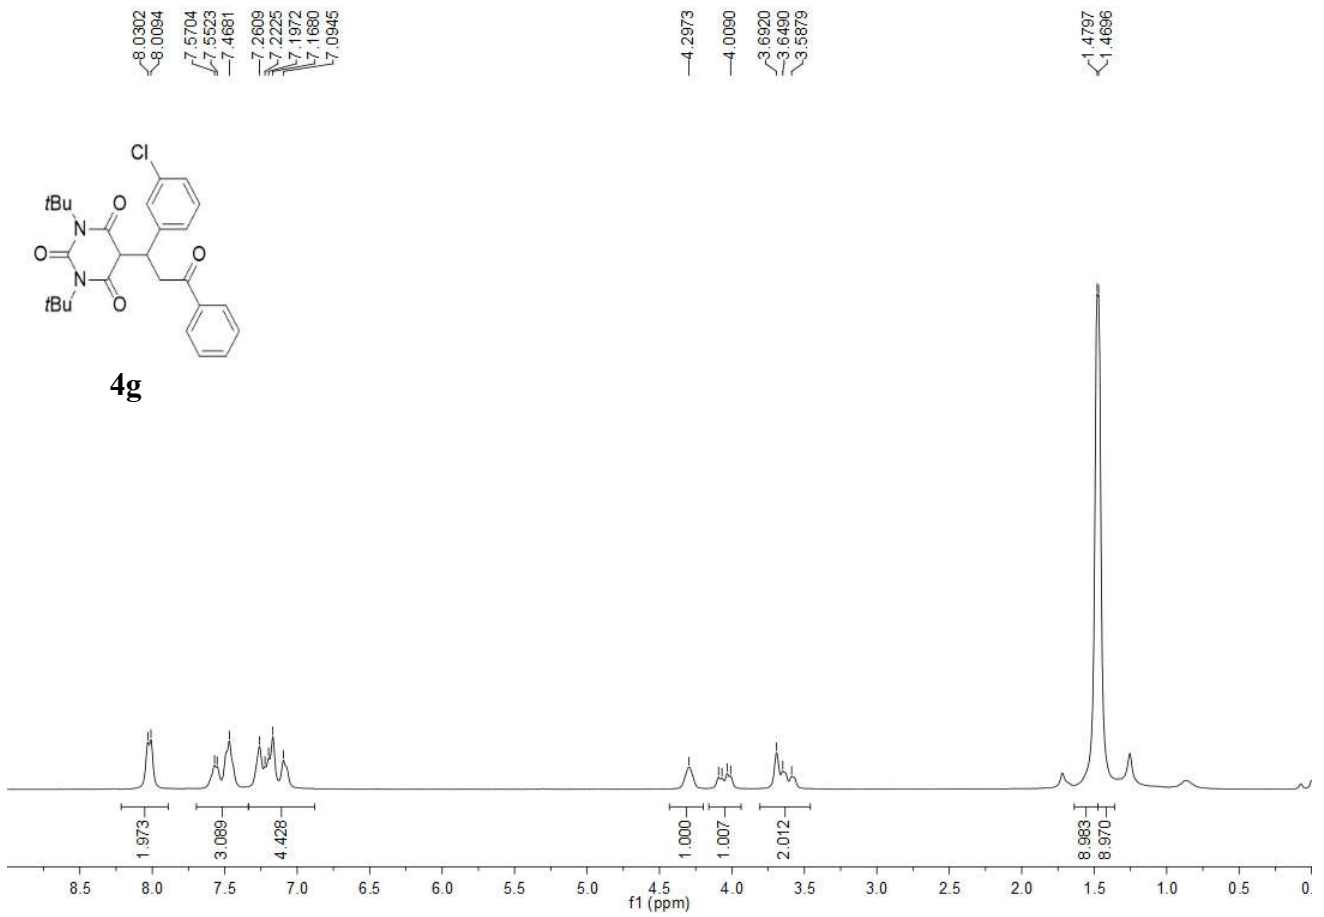

LY-3-13-1 75M NMR CDCl3

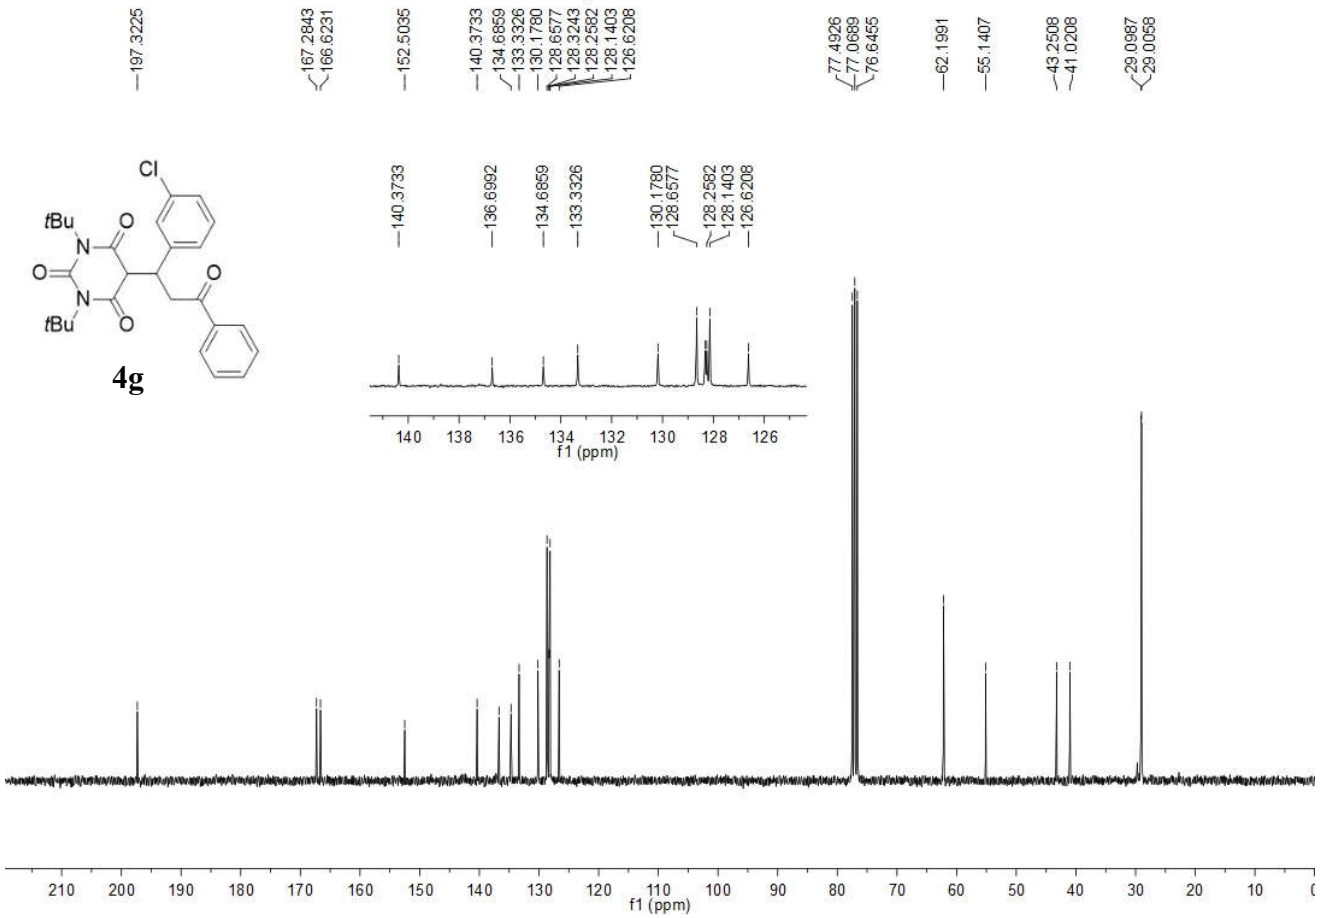

1y-3-13-2 300M NMR CDCL3

7.9607  
7.9354  
7.5445  
7.5213  
7.4571  
7.4330  
7.4088  
7.3427  
7.2597  
7.1964

4.8312  
4.8110  
3.8971  
3.8605  
3.8363  
3.7951  
3.7790  
3.5775  
3.5566  
3.5163  
3.4961

1.5244  
1.4664

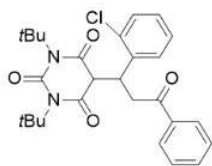

4h

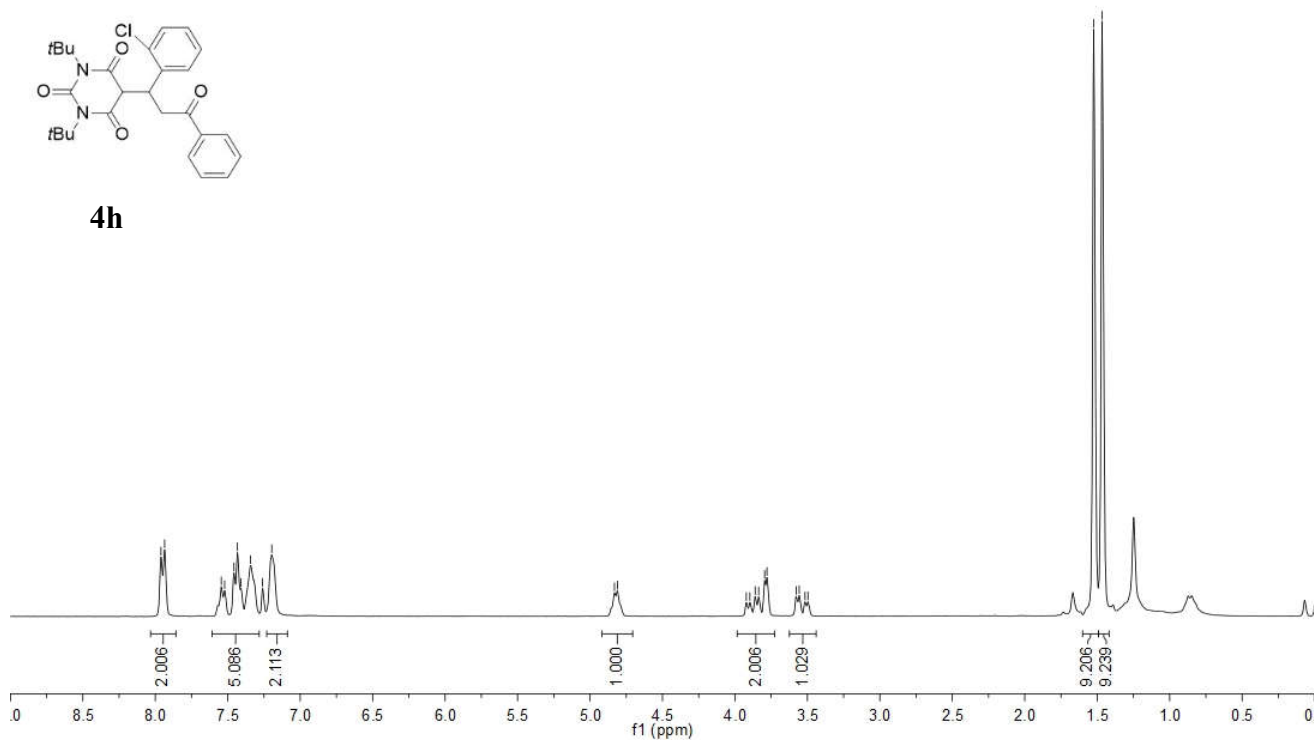

1y-3-13-2-c 75M NMR CDC13

197.1886

167.4839  
167.1390

152.9400

137.5336  
136.5057

134.1862  
133.2590

130.1508  
129.1334  
128.8056  
128.6127  
128.1194  
127.1920

77.4910  
77.0676  
76.8440

62.1597  
62.0722

55.8344

41.9425  
38.6862

29.1621  
29.1369

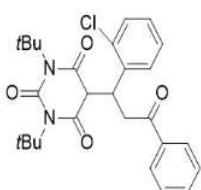

4h

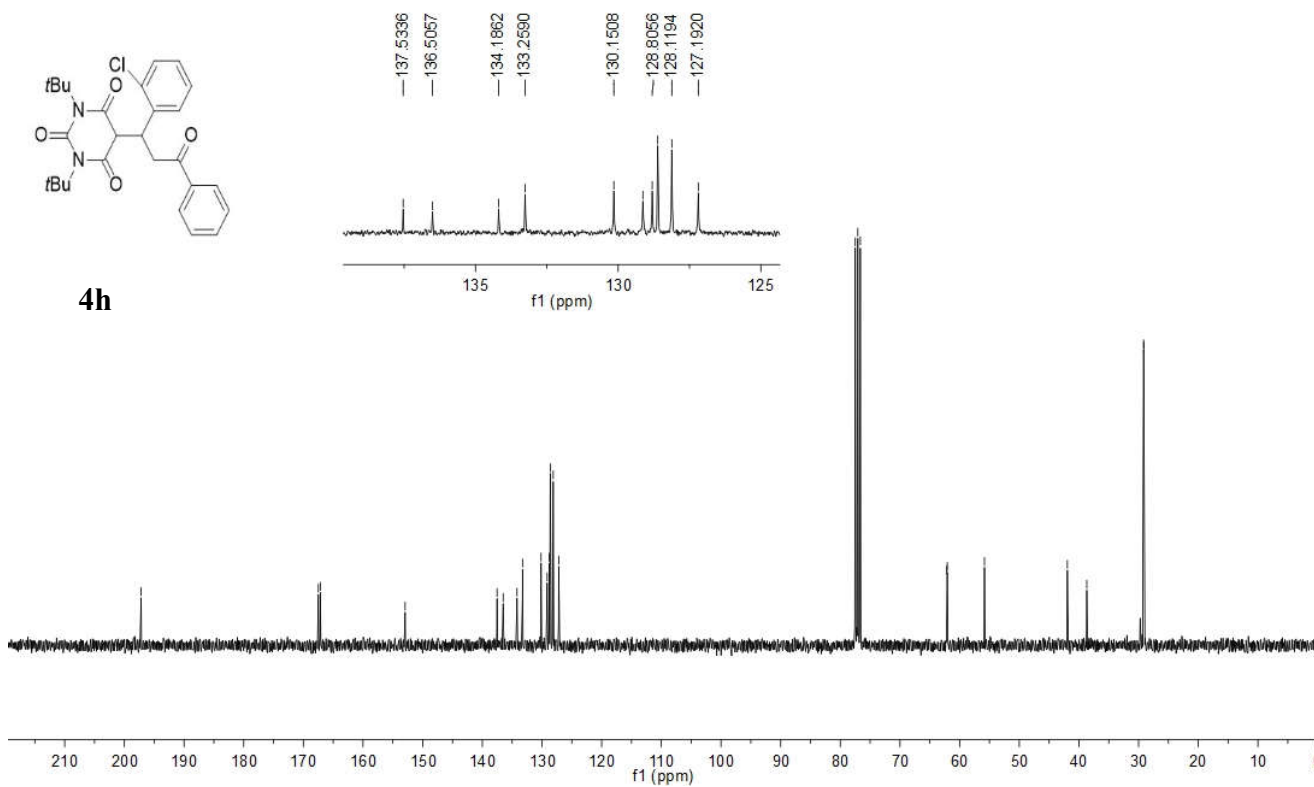

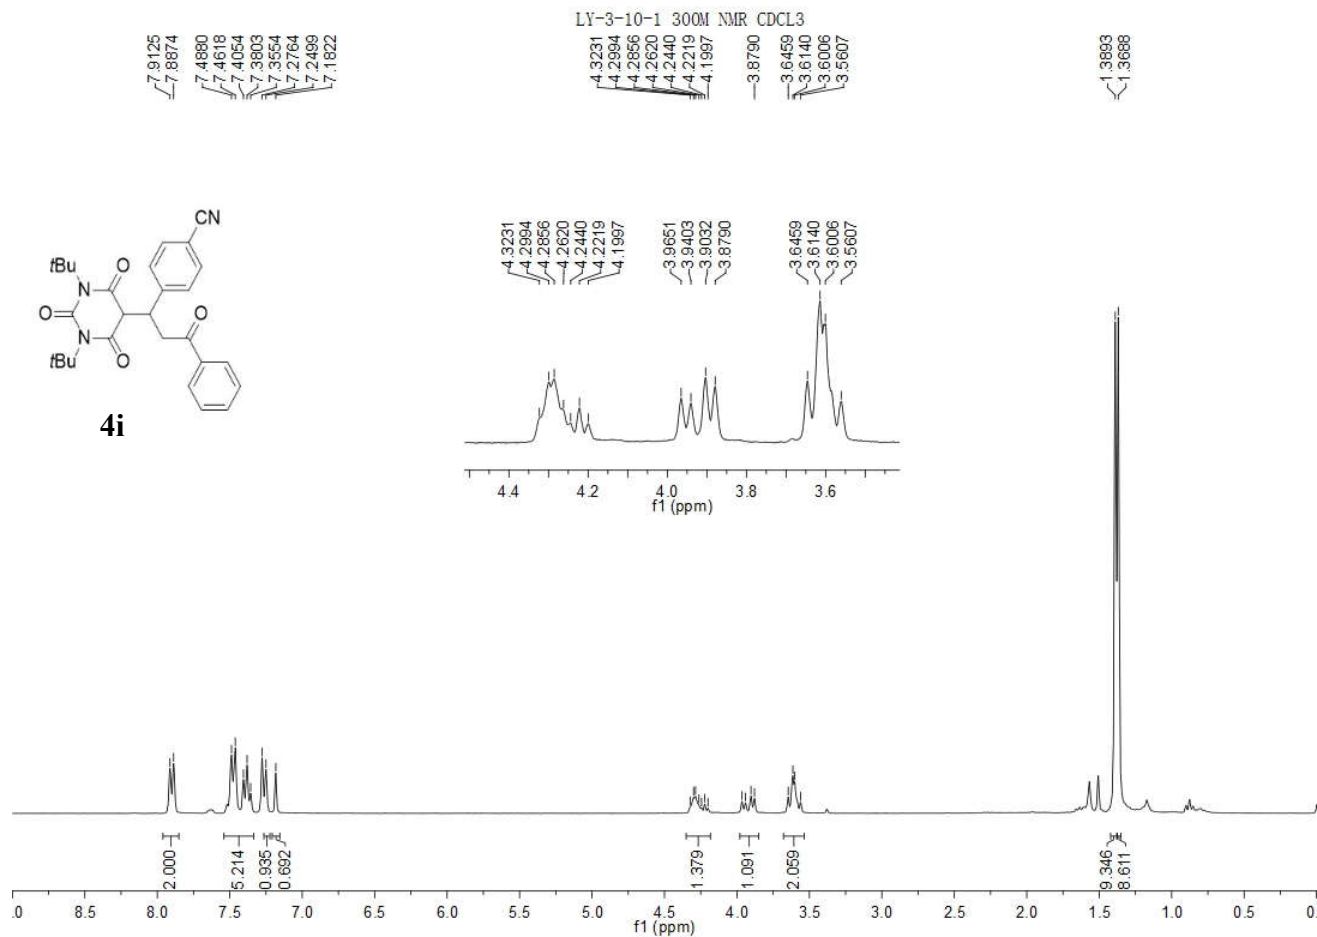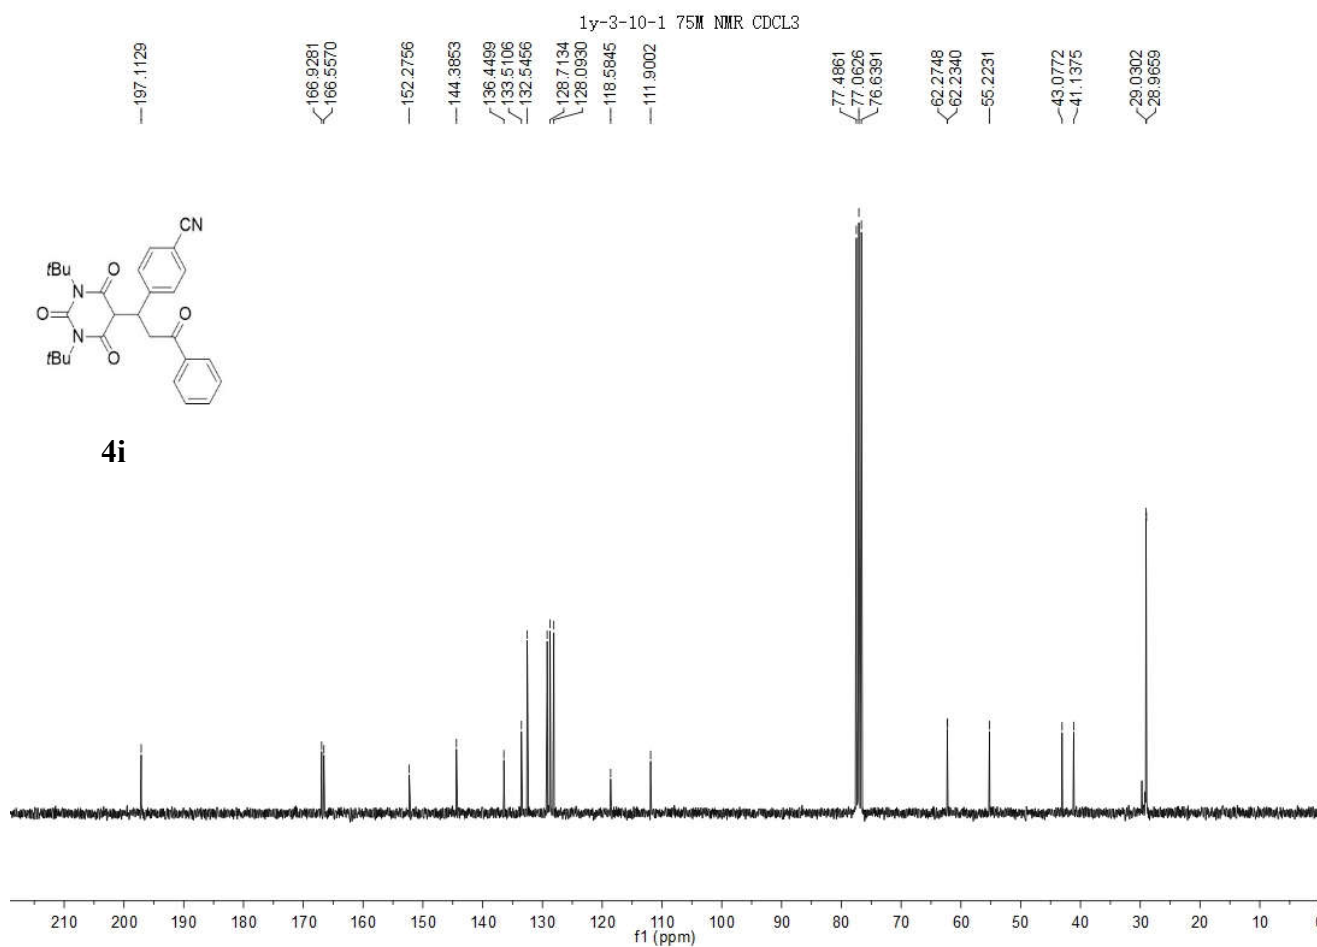

LY-2-90 300M NMR CDCL3

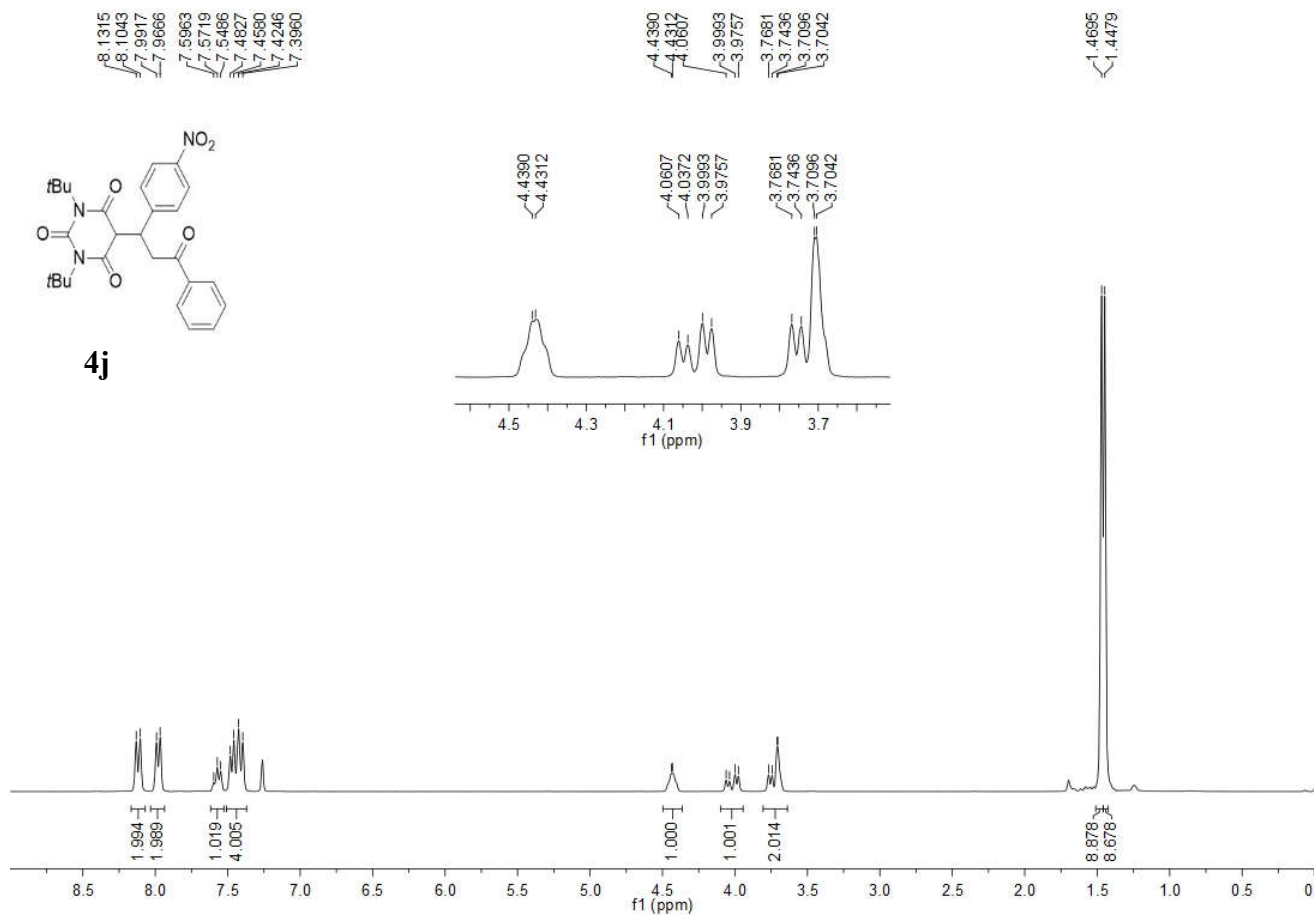

1y-2-90 75M NMR CDCL3

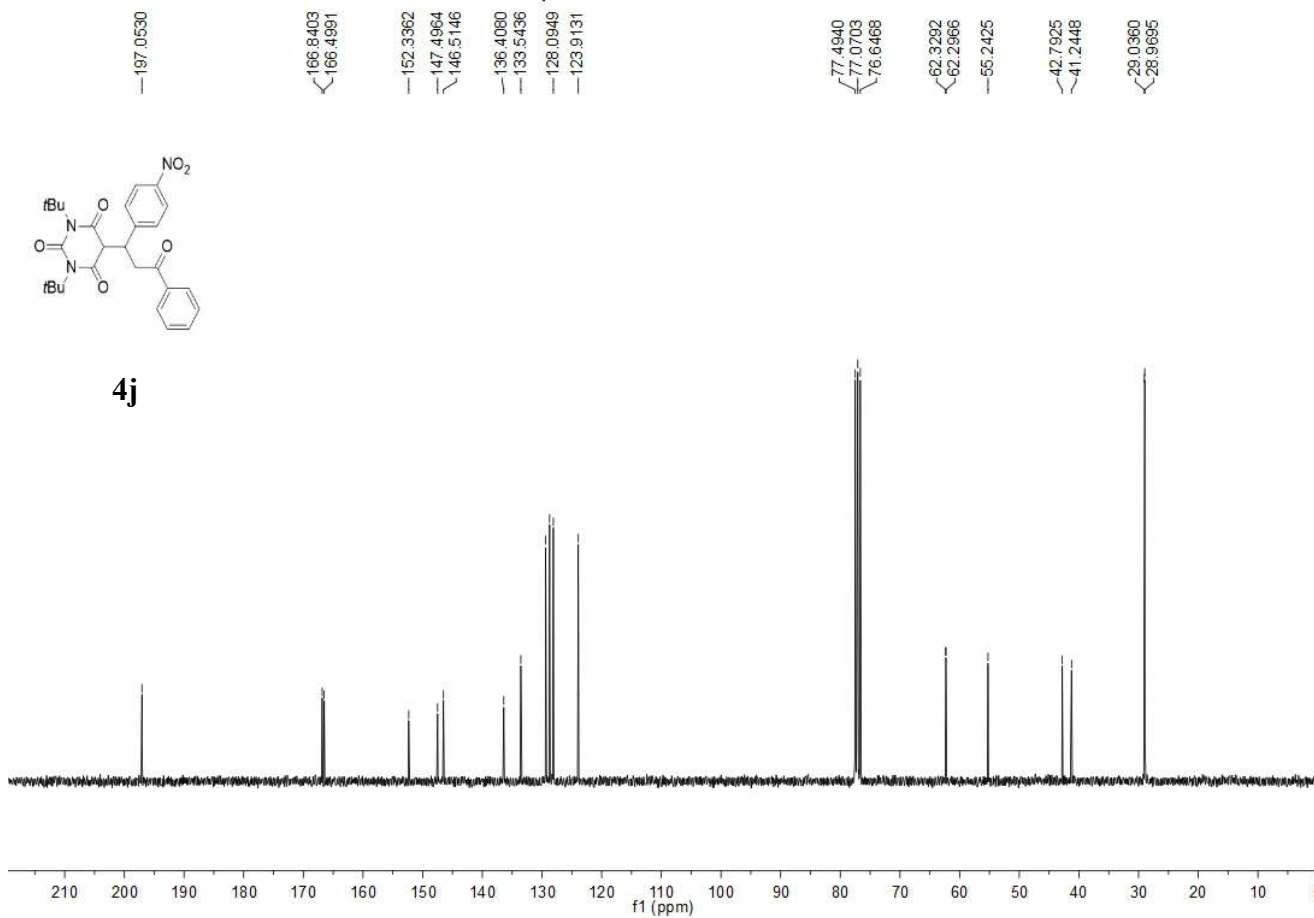



1y-2-91 300M NMR CDCL3

8.1587  
8.1325  
8.0828  
8.0158  
7.9899  
7.5805  
7.5611  
7.4929  
7.4704  
7.4530

4.5004  
4.4938  
4.4577  
4.4478  
4.4238  
4.0887  
4.0268  
3.7630  
3.7373  
3.7248  
3.7134  
3.6775

-1.4381

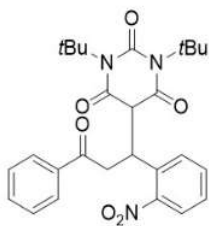

4k

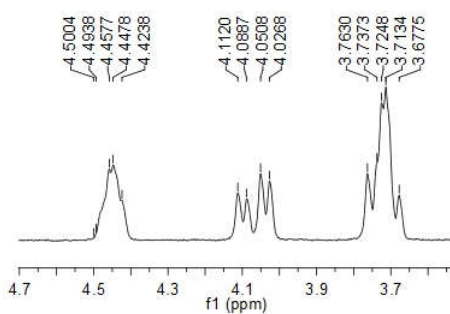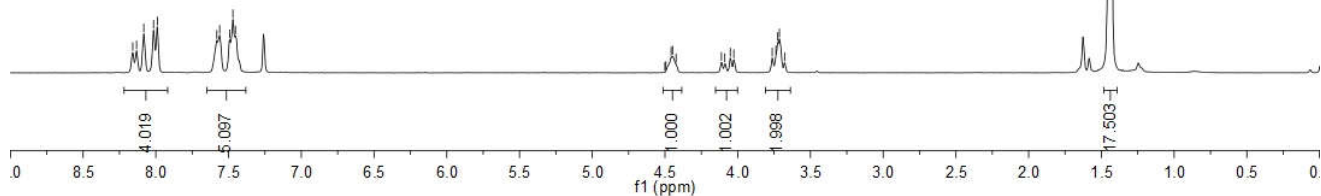

LY-2-91 75M NMR CDCL3

-197.0604

166.8872  
166.3409

-152.5195

-148.3672

-140.9347

-133.5257

-128.1316

-123.1397

-122.9813

77.4732

77.0496

76.6259

-62.3668

-55.2357

-42.8102

-41.1784

-29.0190

-28.9581

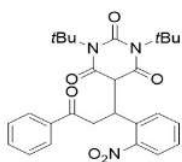

4k

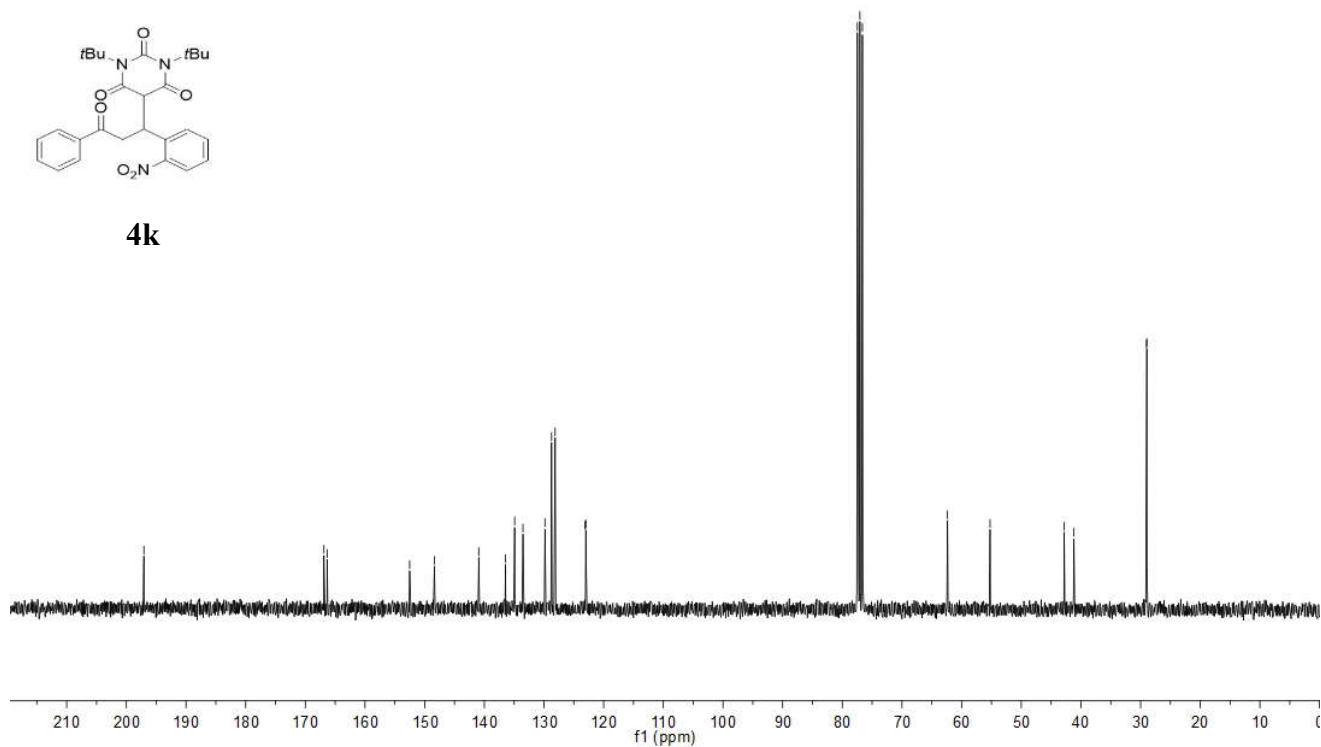

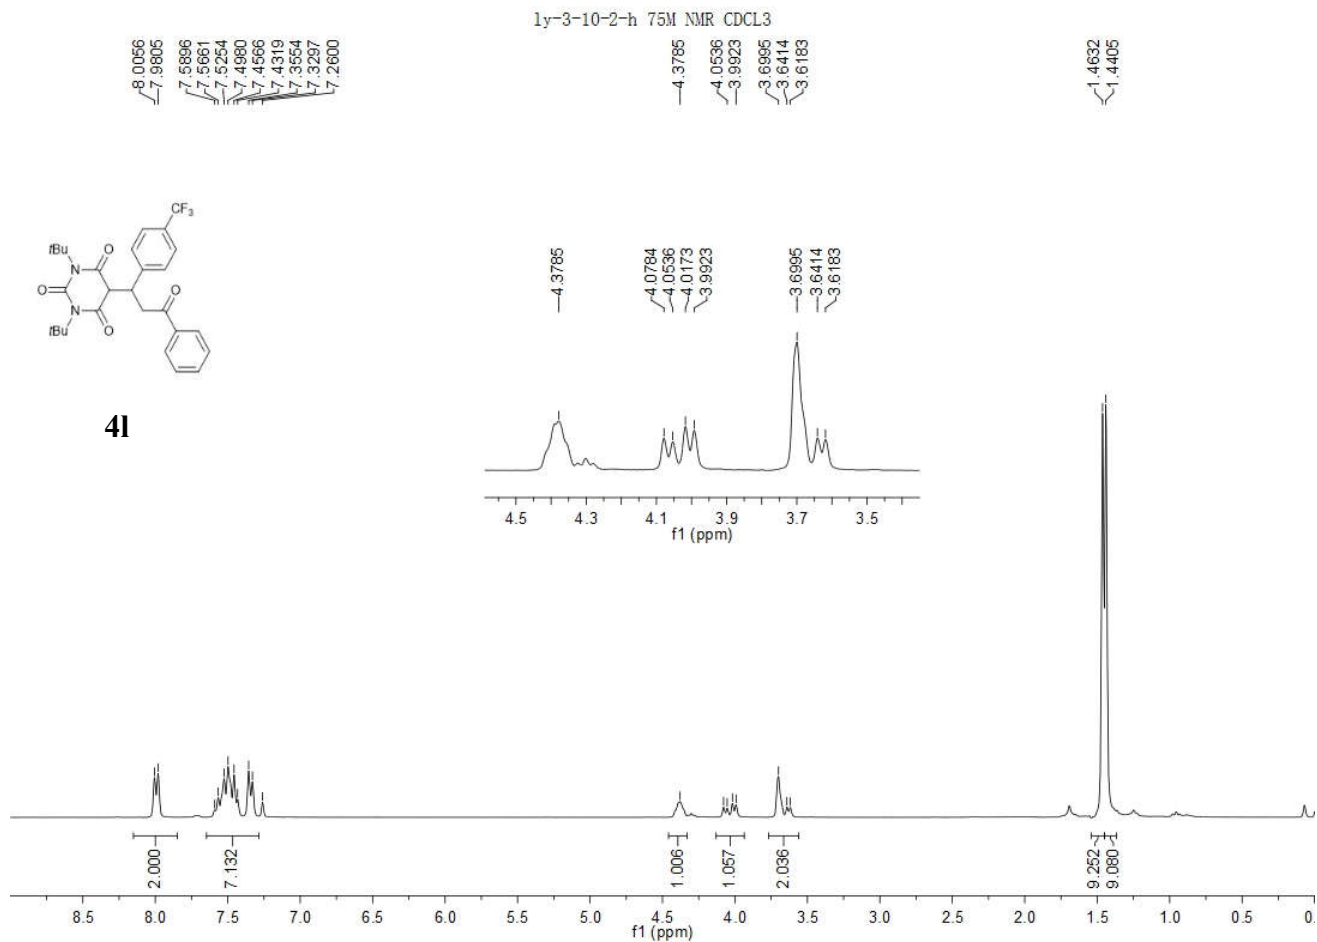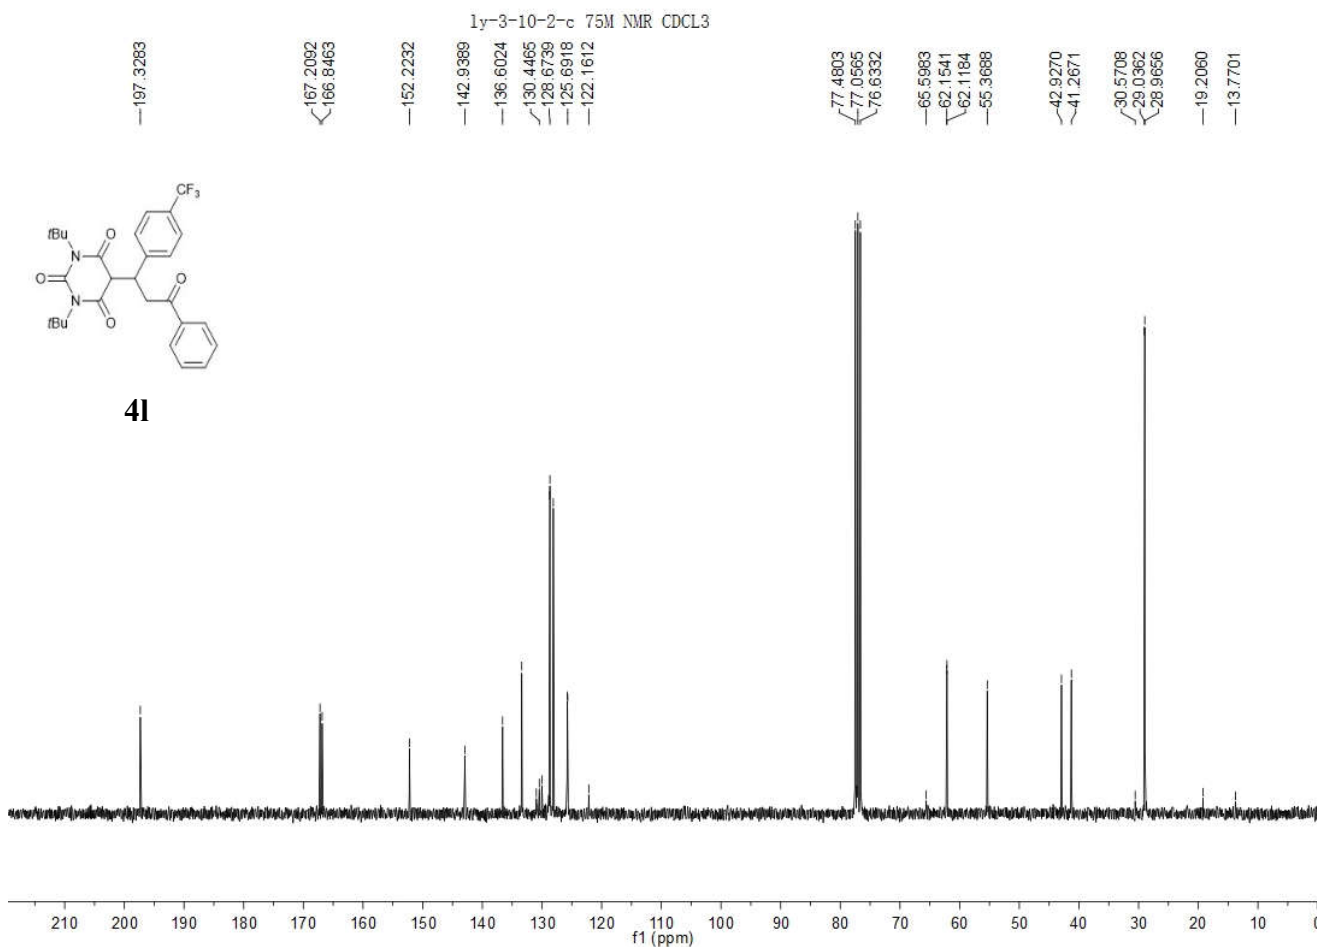

ly-3-2 300M NMR CDCL3

8.0436  
8.0187  
7.7829  
7.7637  
7.7338  
7.6888  
7.6368  
7.5570  
7.5324  
7.4564  
7.3337  
7.3064  
7.2805

4.4796  
4.1942  
4.1335  
3.7878  
3.7464  
3.7266  
3.6852  
3.6654

1.4189  
1.3861

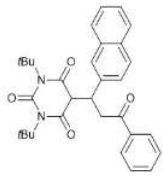

4m

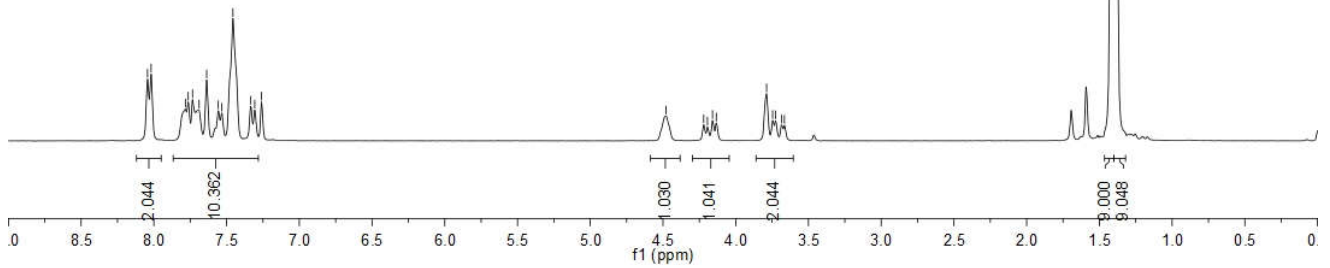

LY-3-2-C 75M NMR CDCL3

197.6895  
167.6767  
167.0986  
152.3136

135.9706  
133.2045  
133.1500  
132.9501  
128.7326  
128.6152  
128.1618  
127.7792  
127.7287  
127.2613  
126.3050  
126.0997

77.4921  
77.0687  
76.6452  
61.9124  
61.8561  
55.7180  
43.7157  
41.4736  
29.0654  
28.9783

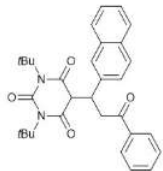

4m

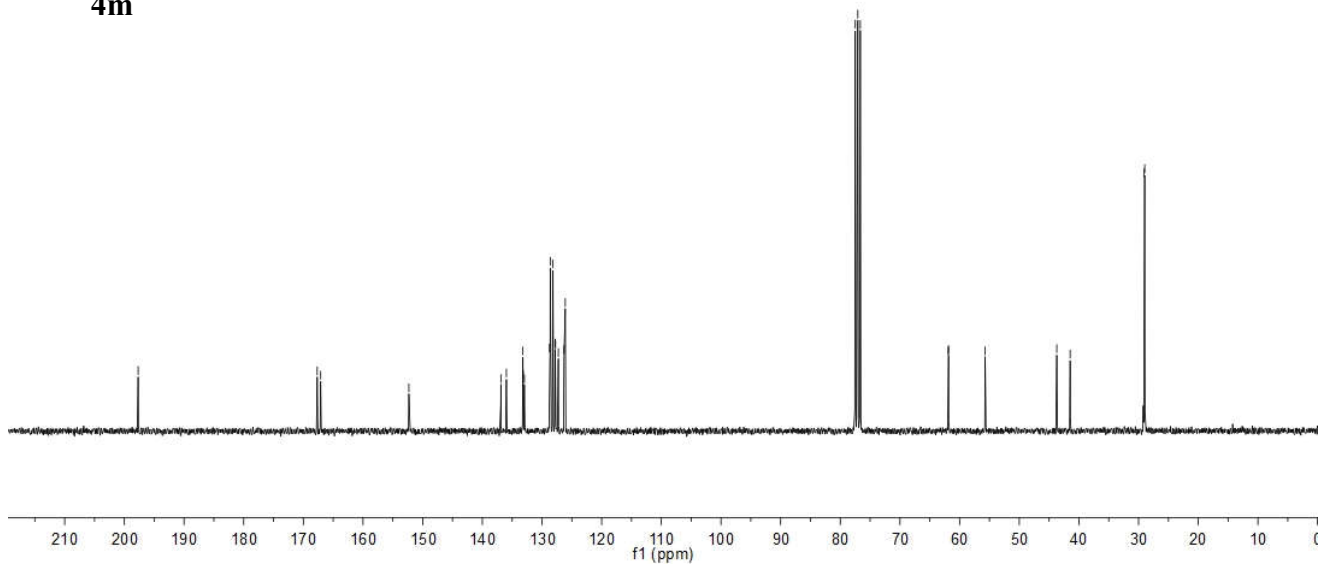

1y-3-7 300M NMR CDCL3

7.9253  
7.8987

7.2629  
7.2337  
7.1960

4.2885

3.9883

3.7136

3.7018

3.6058

3.5646

3.5244

2.4011

1.4663  
1.4455

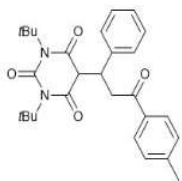

4n

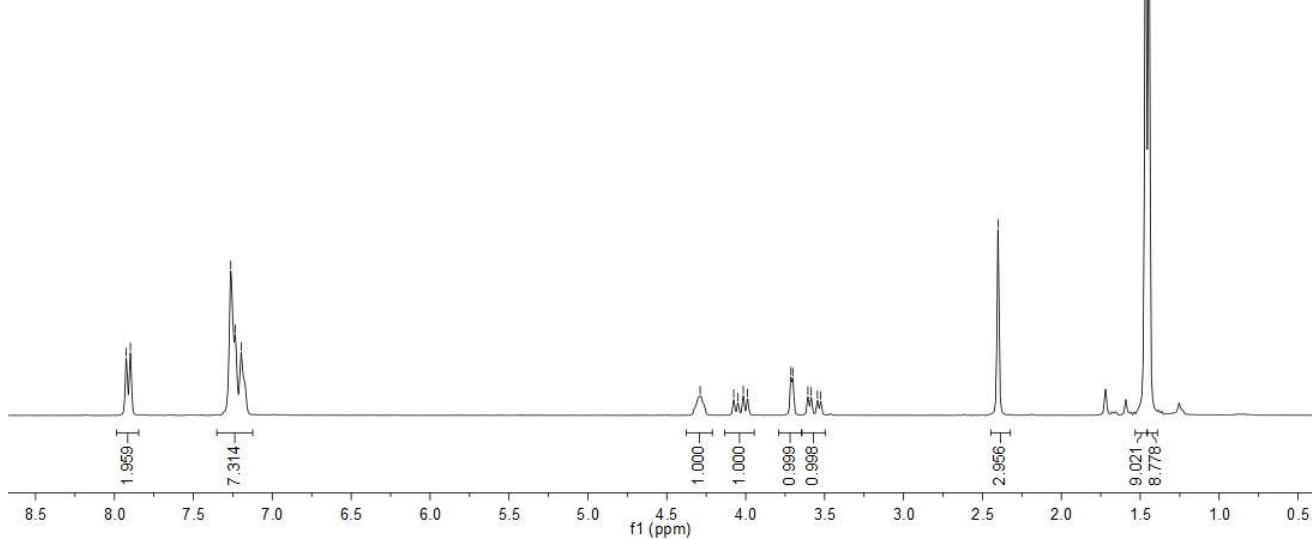

LY-3-7 75M NMR CDC13

197.3077

167.6749  
167.0812

152.5086

143.9171

138.4659

134.4705

129.2552

128.8130

128.3455

128.2480

128.0575

77.4819

77.0582

76.6349

61.9534

61.9129

55.6100

43.7037

41.1378

29.0872

29.0190

21.6848

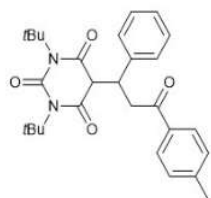

4n

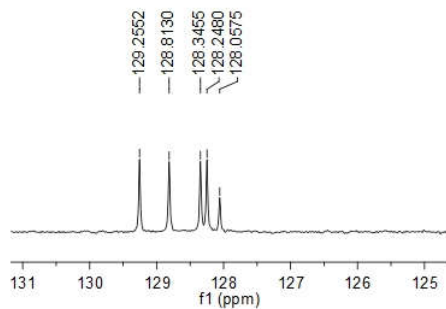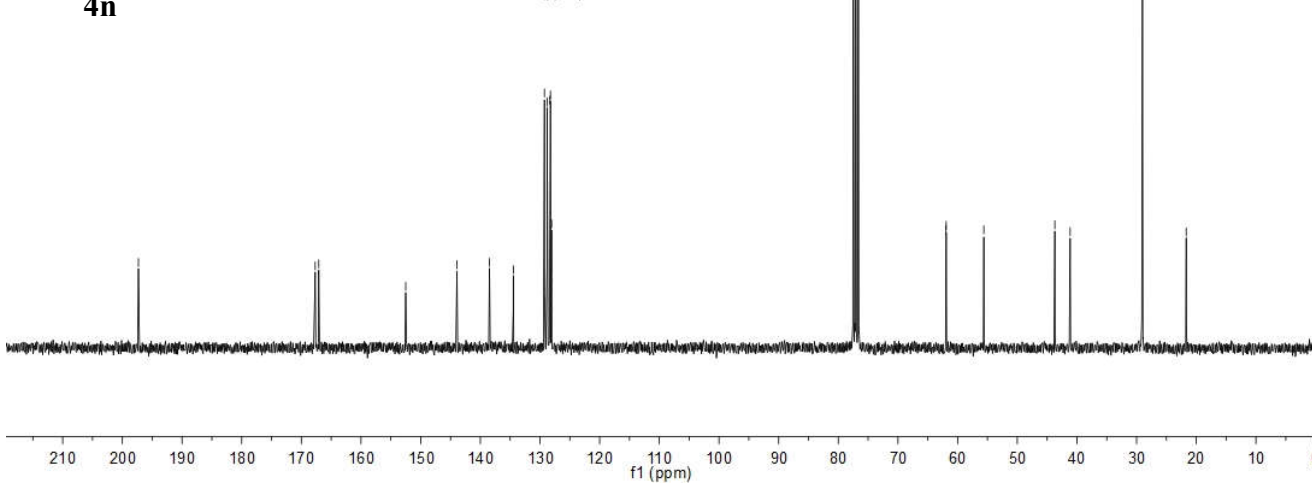

LY-2-86 300M CDCL3 NMR

8.0699  
8.0362  
8.0171

7.2601  
7.1853  
7.1498  
7.1183  
7.0916

4.2750

4.0070

3.6889

3.5660

3.5460

3.5049

3.4857

3.4565

1.4644

1.4372

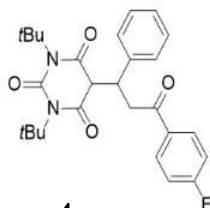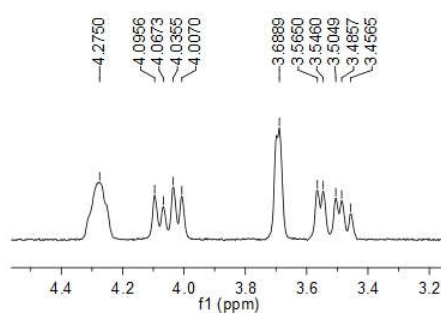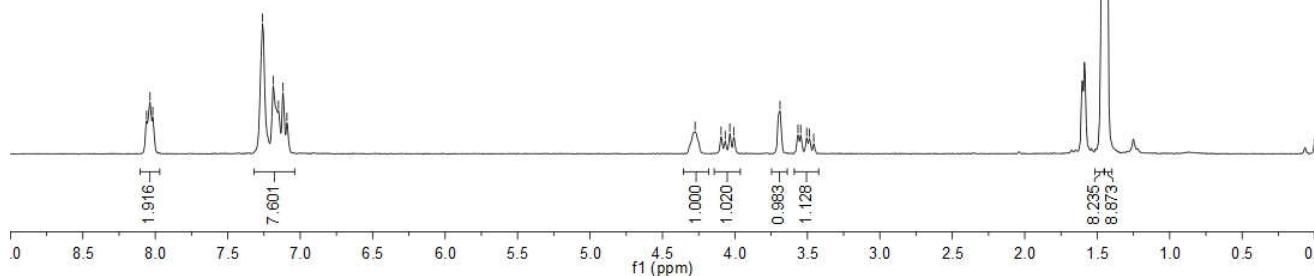

1y-2-86 13C CDCL3 75M NMR

196.1675

167.5674

167.0521

161.5923

158.1433

152.4611

138.2664

130.8331

128.8663

128.2974

128.1646

115.8244

115.5334

77.4560

77.0327

76.6092

62.0100

61.9750

55.4001

43.6113

41.1813

29.0727

28.9894

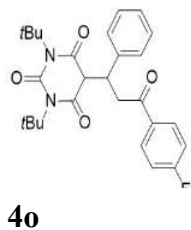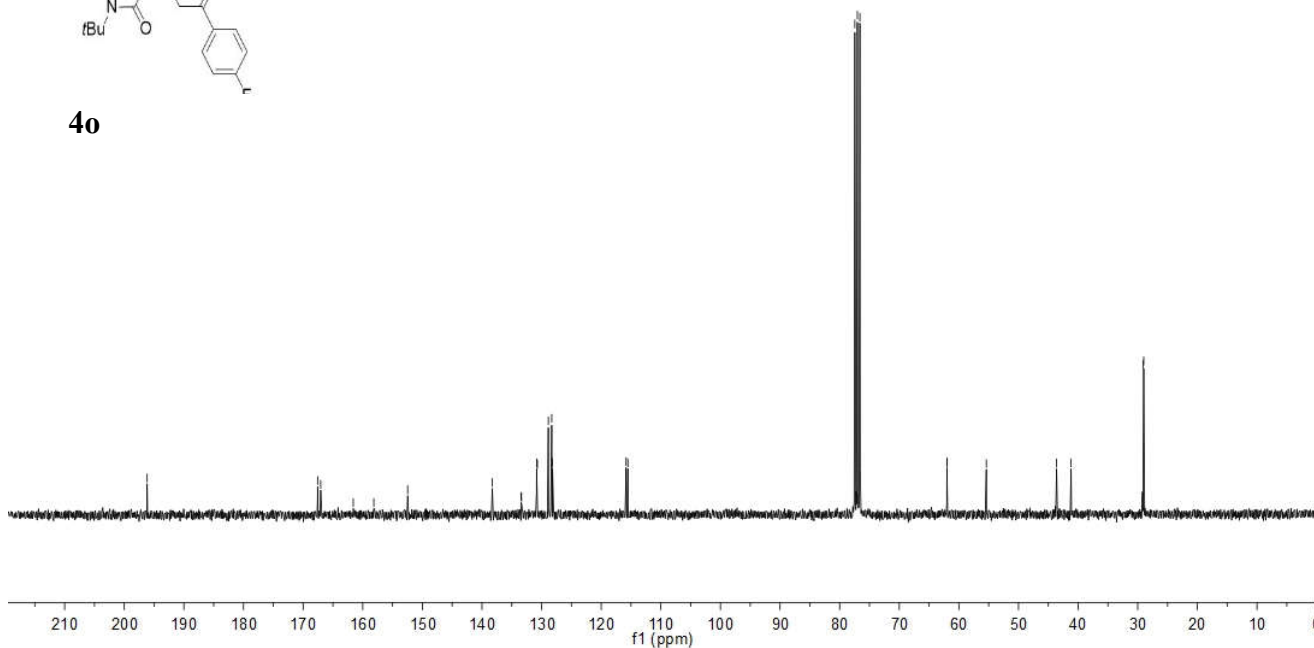

LY-3-12-1 300M NMR CDCL3

7.8851  
7.8598  
7.6009  
7.5760  
7.3036  
7.2602  
7.1735  
7.1575

4.2645  
3.9970  
3.6766  
3.5584  
3.5397  
3.4966  
3.4787

1.4569  
1.4311

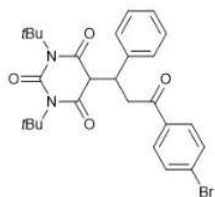

4p

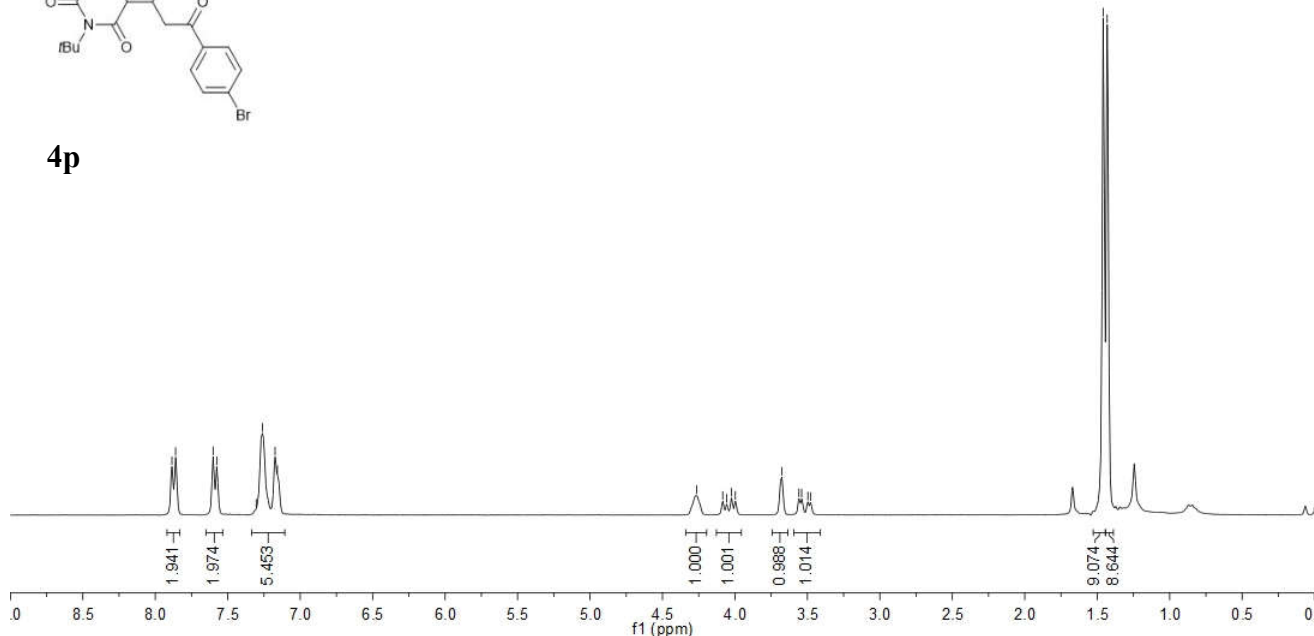

Ly-3-12-1-c 75M NMR CDCL3

196.7674

167.5234  
166.9857

152.4500

138.1161  
136.6100

131.9102

129.6869  
128.8988

128.3660  
128.2773

128.2230

77.4858  
77.0623  
76.6388

62.0249  
61.9940

55.2916

43.5536  
41.1914

29.0651  
28.9908

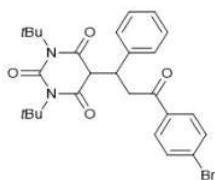

4p

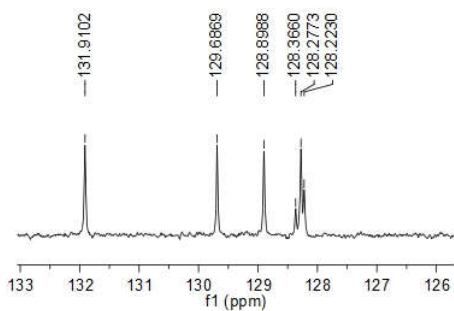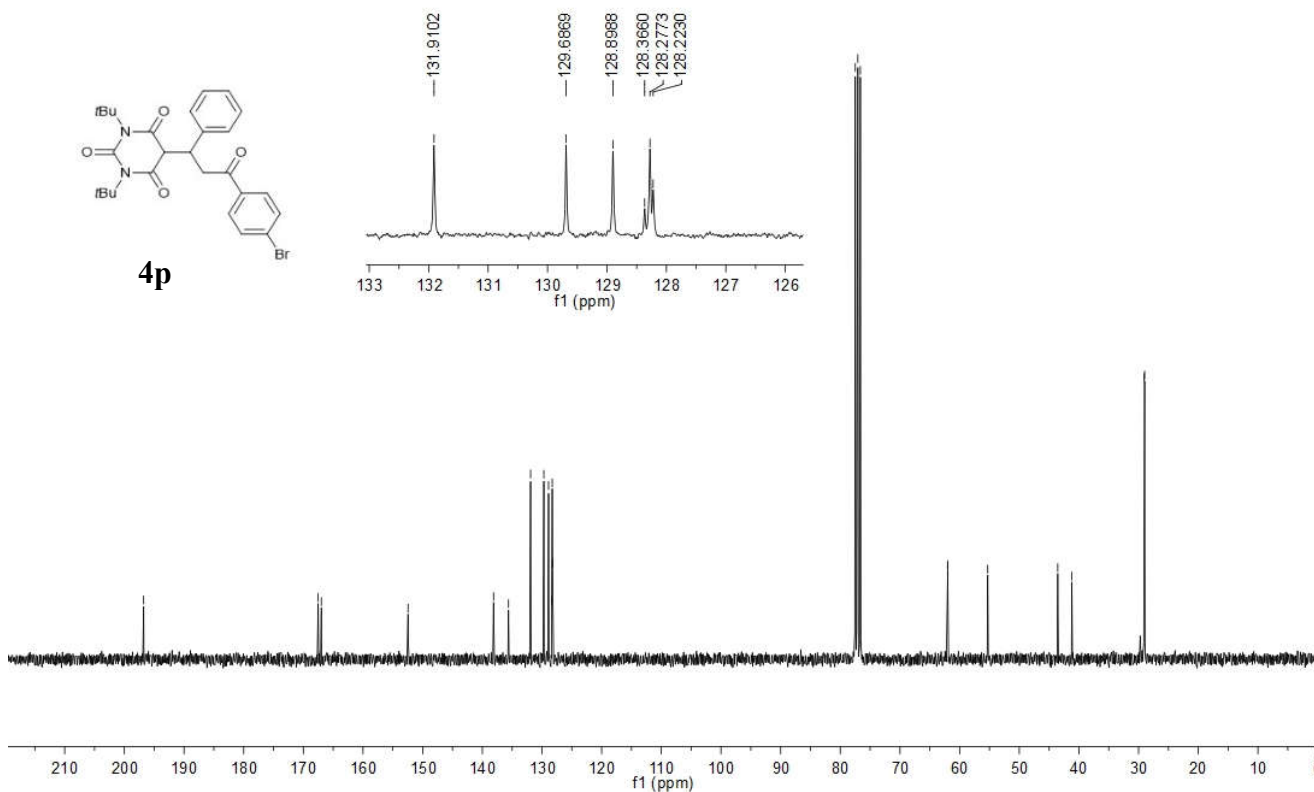

LY-3-4-H NMR 300M CDCL3

8.5561  
8.0388  
7.9710  
7.8864  
7.8551  
7.5217  
7.2629

4.3599  
4.2458  
4.2188  
4.1853  
4.1589  
3.7752  
3.7626  
3.7200  
3.6993

1.4825  
1.4580

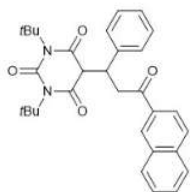

4q

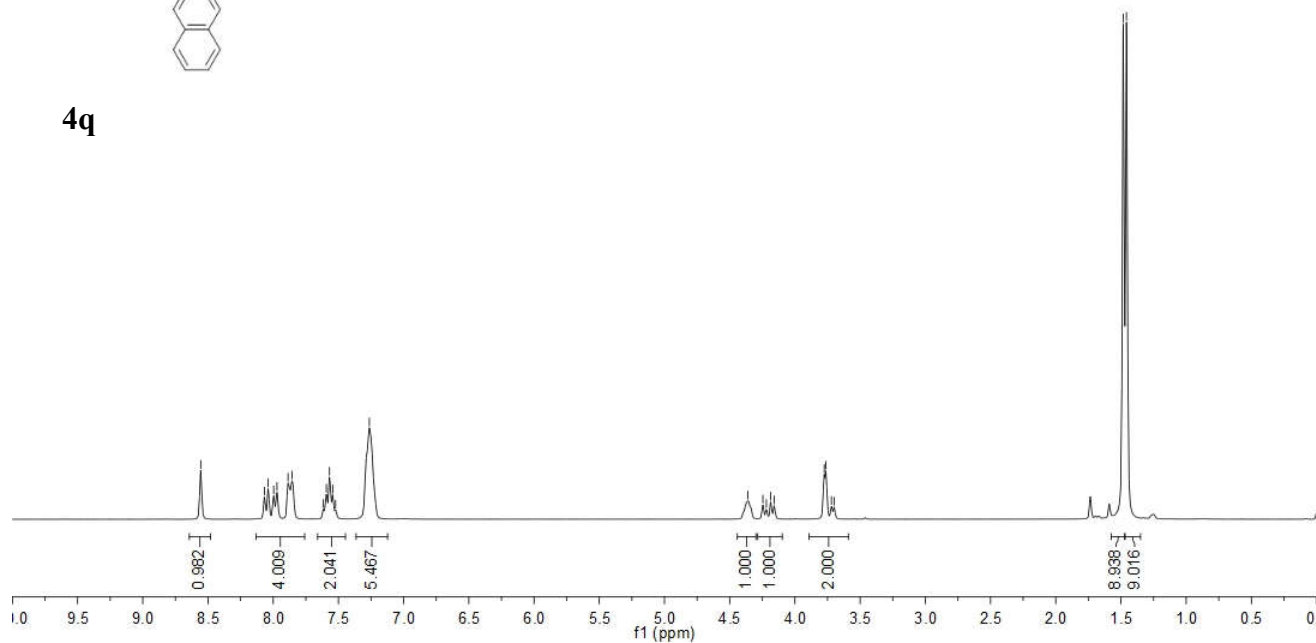

LY-3-4 75M NMR CDC13

197.6286  
167.6822  
167.1358  
152.5118  
138.4456  
135.6597  
134.2722  
132.5305  
129.8105  
129.6555  
128.8734  
128.4341  
128.3751  
128.1318  
127.7626  
126.7391  
126.7391  
123.8921  
77.4933  
77.0698  
76.6462  
62.0070  
61.9635  
55.6071  
43.7900  
41.3739  
29.1046  
29.0342

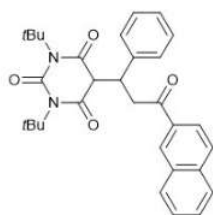

4q

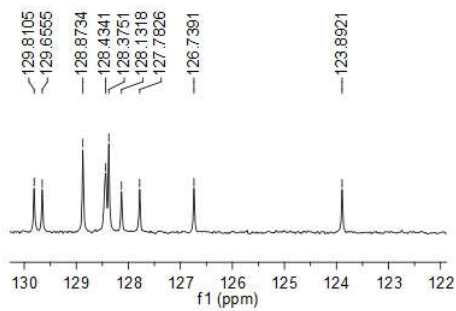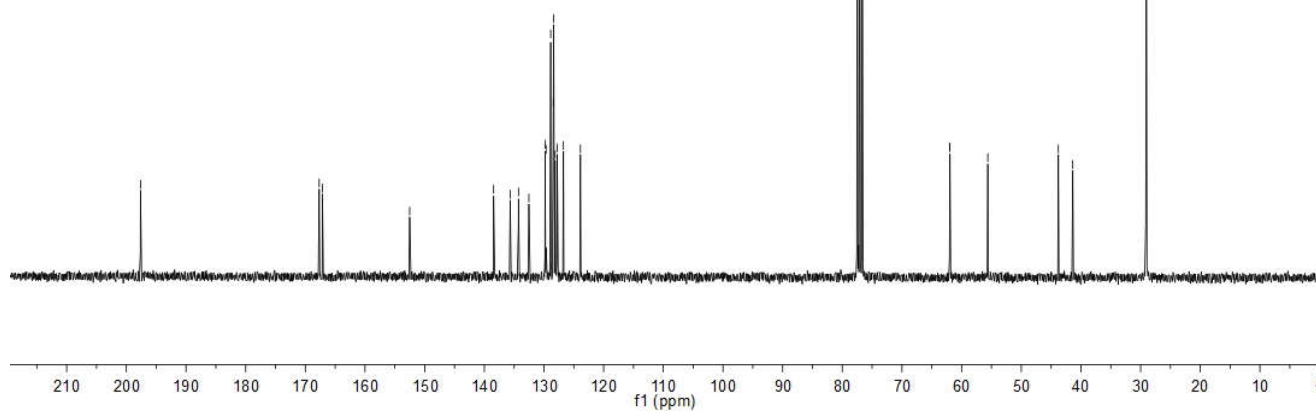

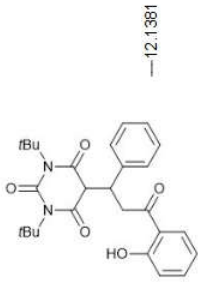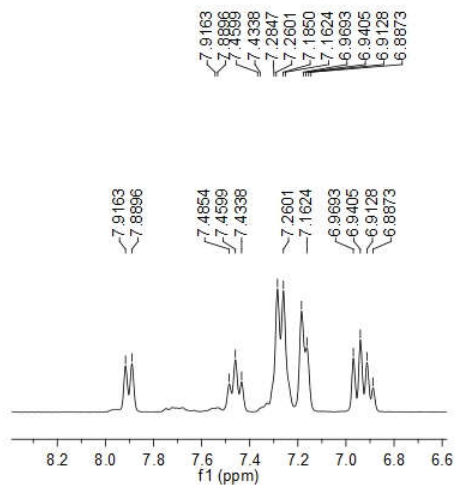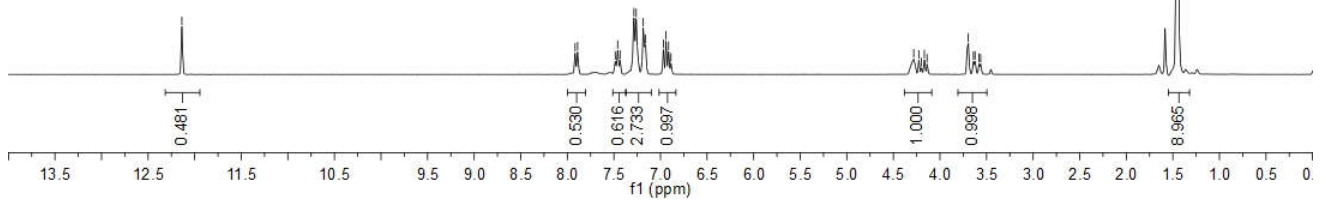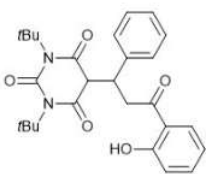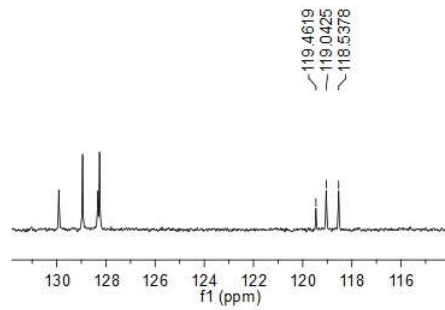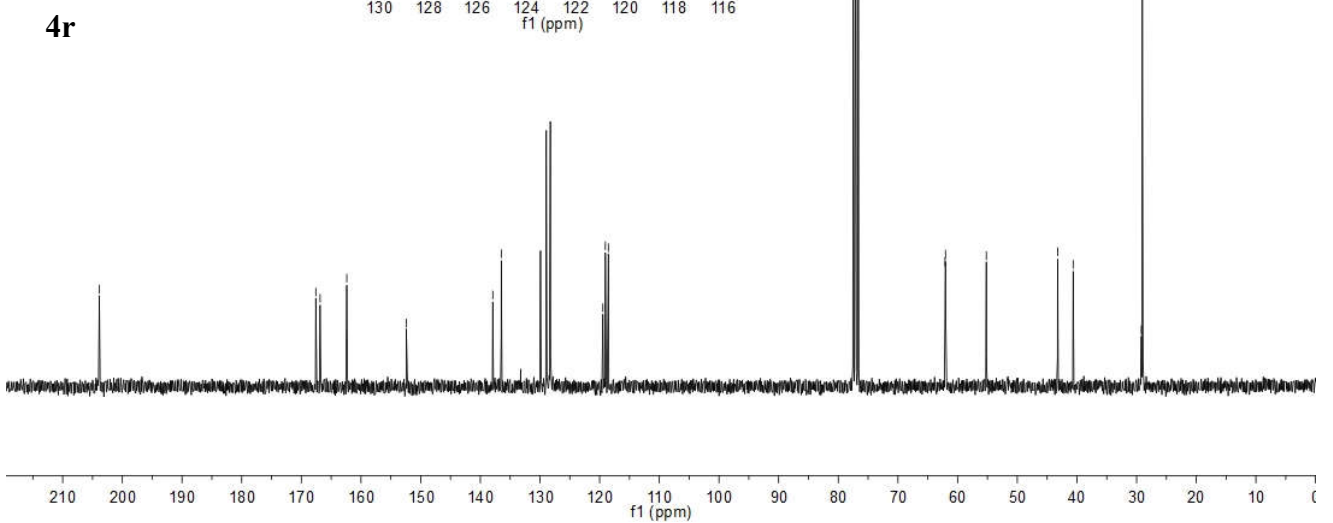



LY-3-3H 300M NMR CDCL3

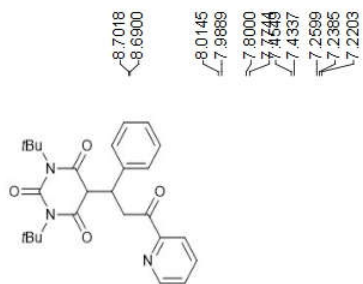

4s

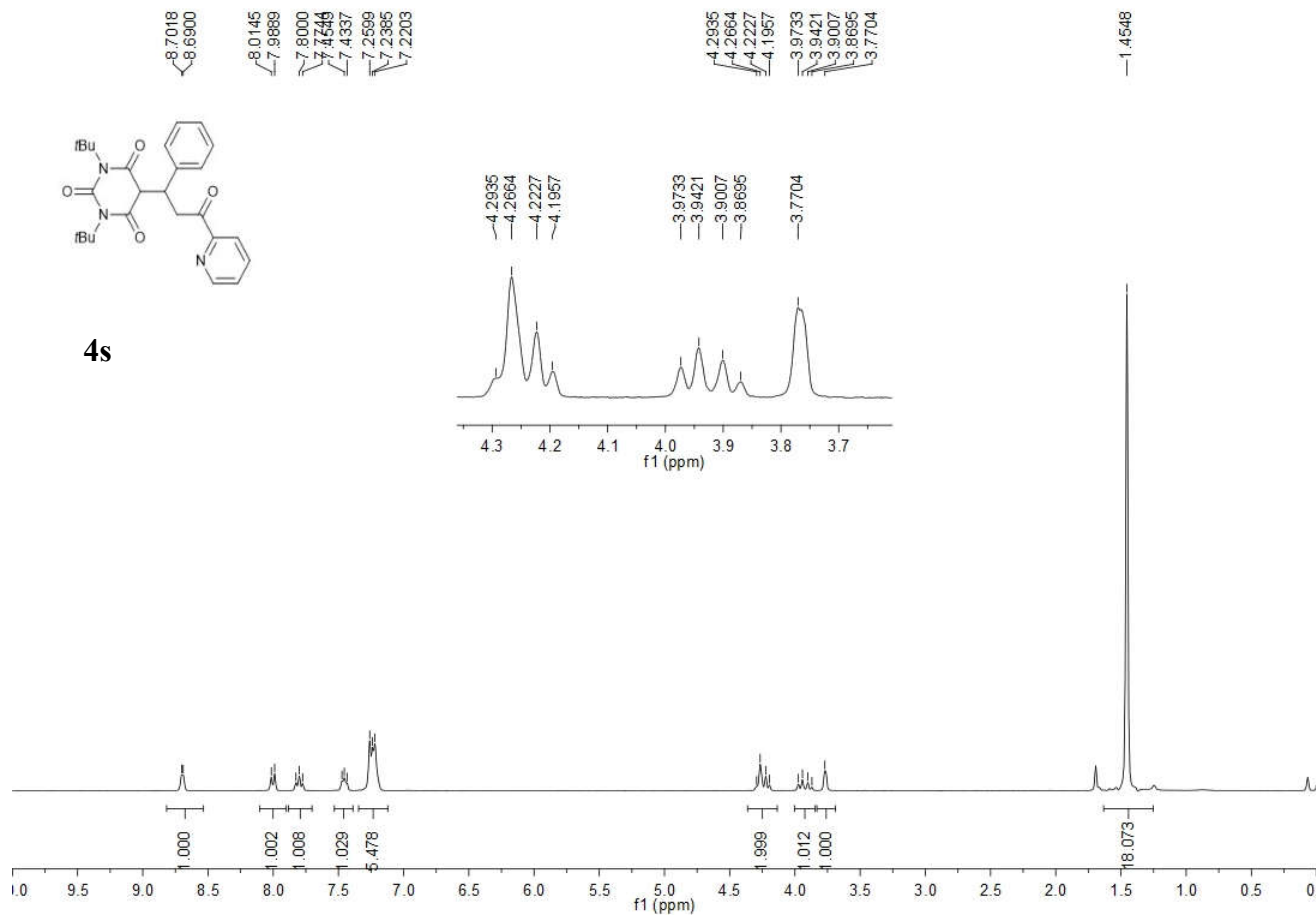

1y-3-3 75M NMR CDC13

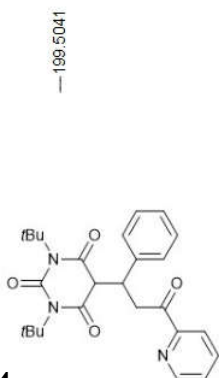

4s

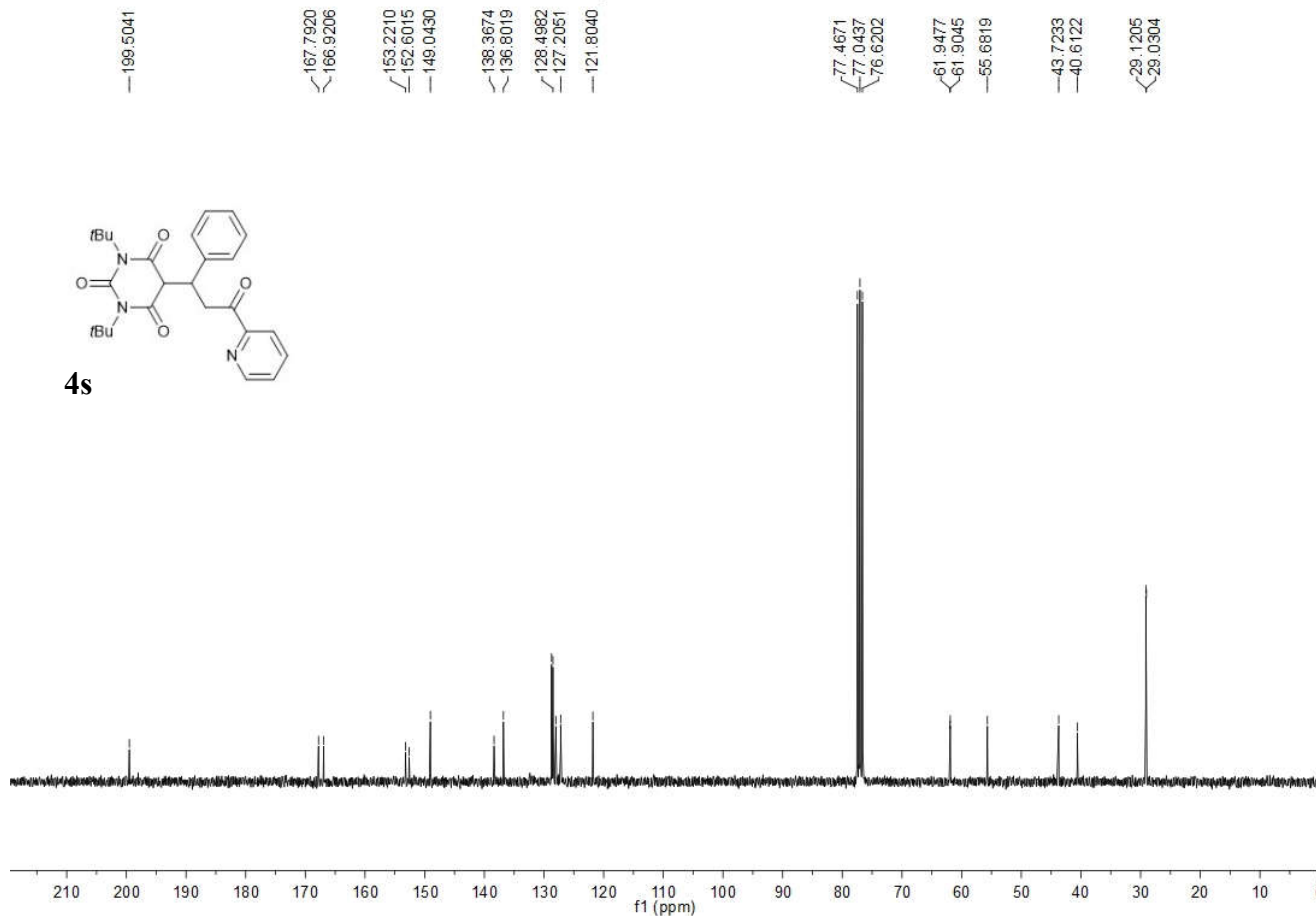

ly-3-8-1 NMR 300M CDCL3

8.1188  
8.0938

7.4567  
7.4298  
7.2600

4.4413

4.1559

3.8822

3.7658

3.7462

3.7061

3.6867

2.6007

2.5048

1.6732

1.6528

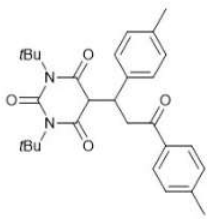

4t

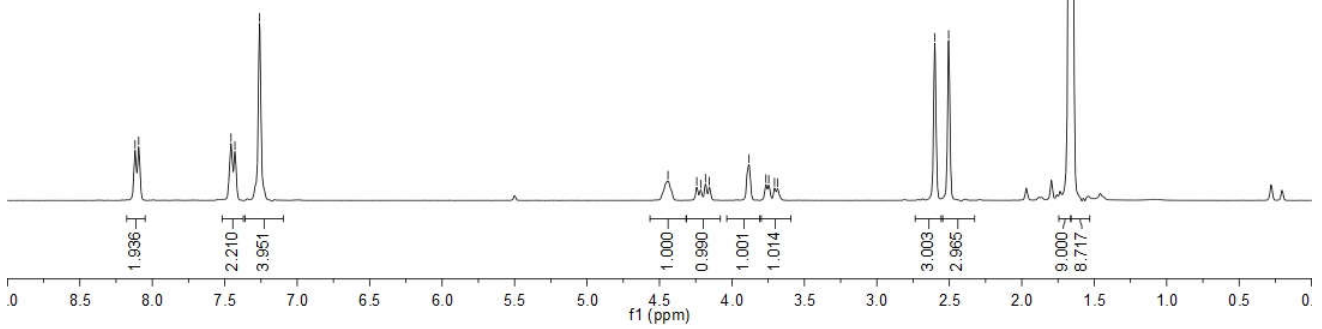

LY-3-8-1 75M NMR CDCL3

197.4035

167.8067  
167.2971

152.4250

143.8596

137.6588

135.4596

134.4842

129.3985

129.2361

128.2498

128.1352

77.4929

77.0694

76.6458

61.8694

61.8409

55.8250

43.2704

41.3685

29.1280

29.0522

21.8864

21.1707

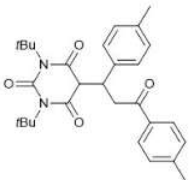

4t

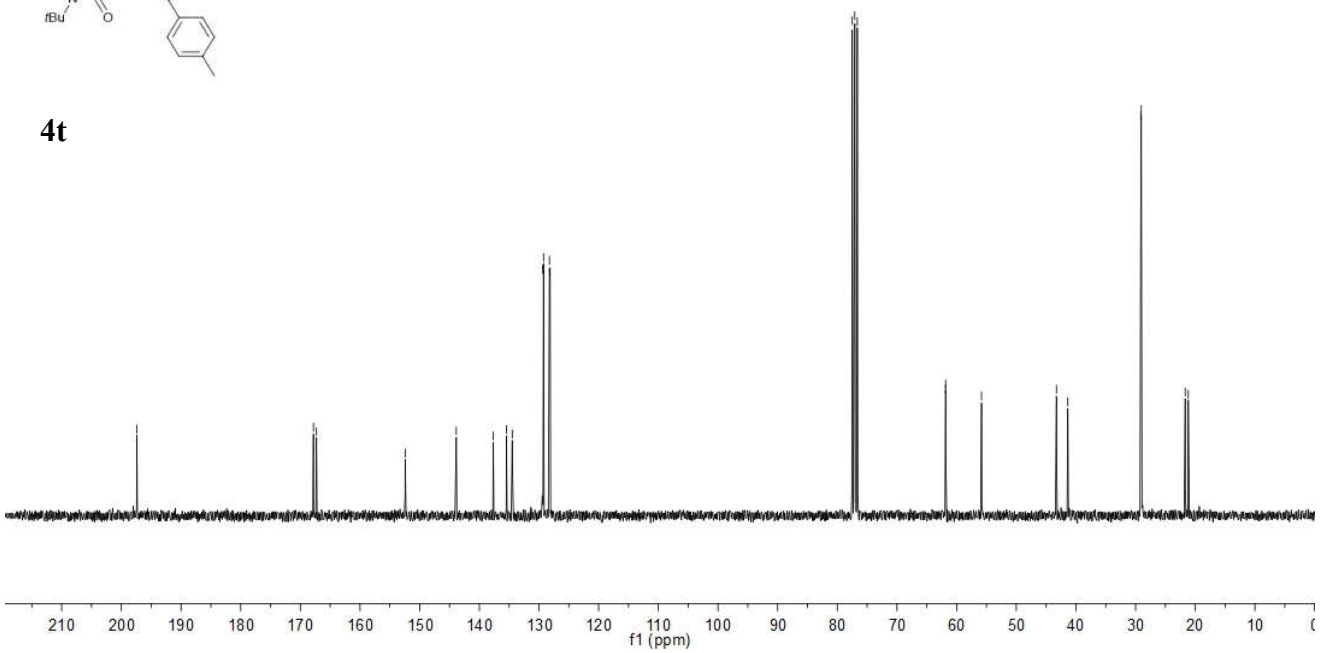

LY-3-8-2 300M NMR CDCL3

8.0929  
8.0677  
7.5881  
7.5629  
7.4088  
7.3891  
7.3646  
7.2852  
7.2602

4.4124  
4.0938  
3.7986  
3.7094  
3.6909  
3.6492  
3.6294

1.6220  
1.5978

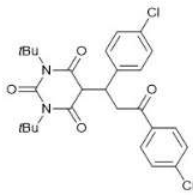

4u

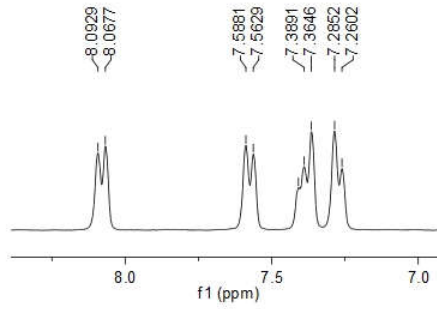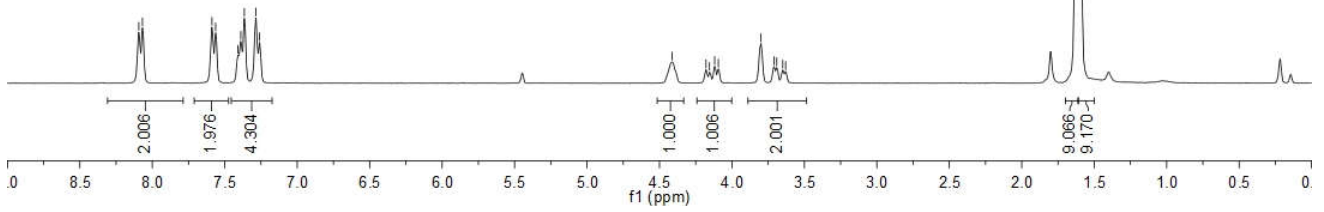

LY-3-8-2-C 75M NMR CDCL3

196.3253

167.2776  
166.8889

152.3053

138.7541

136.9546

135.0473

133.9733

129.6342

129.5374

128.9608

77.4710

77.0476

76.6242

62.1256

62.0945

55.2904

42.6680

41.3587

29.0663

28.9916

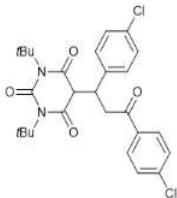

4u

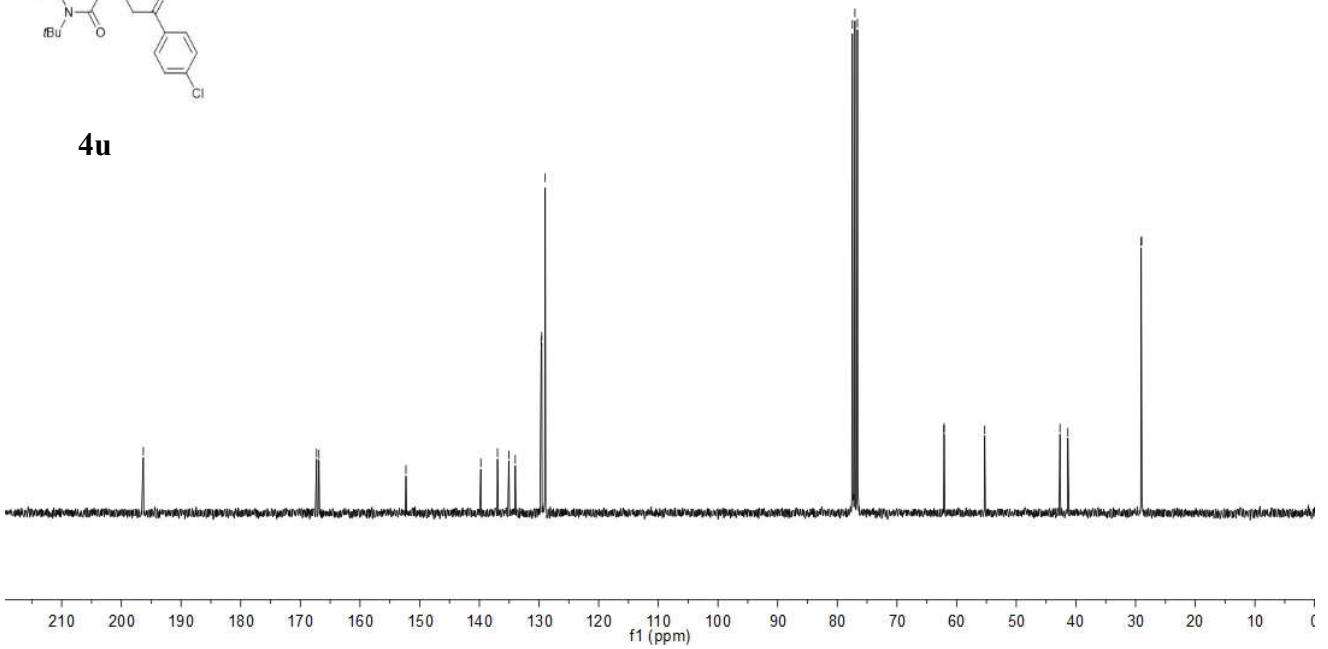

ly-3-6-H 300M NMR CDCL3

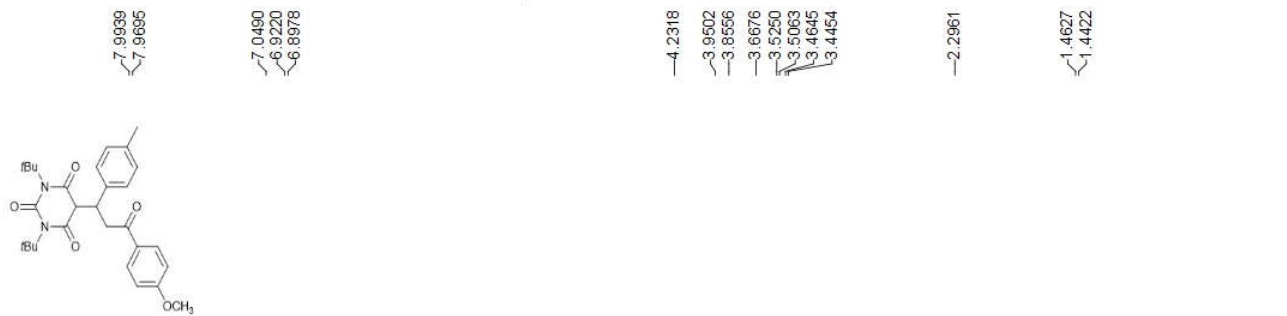

4v

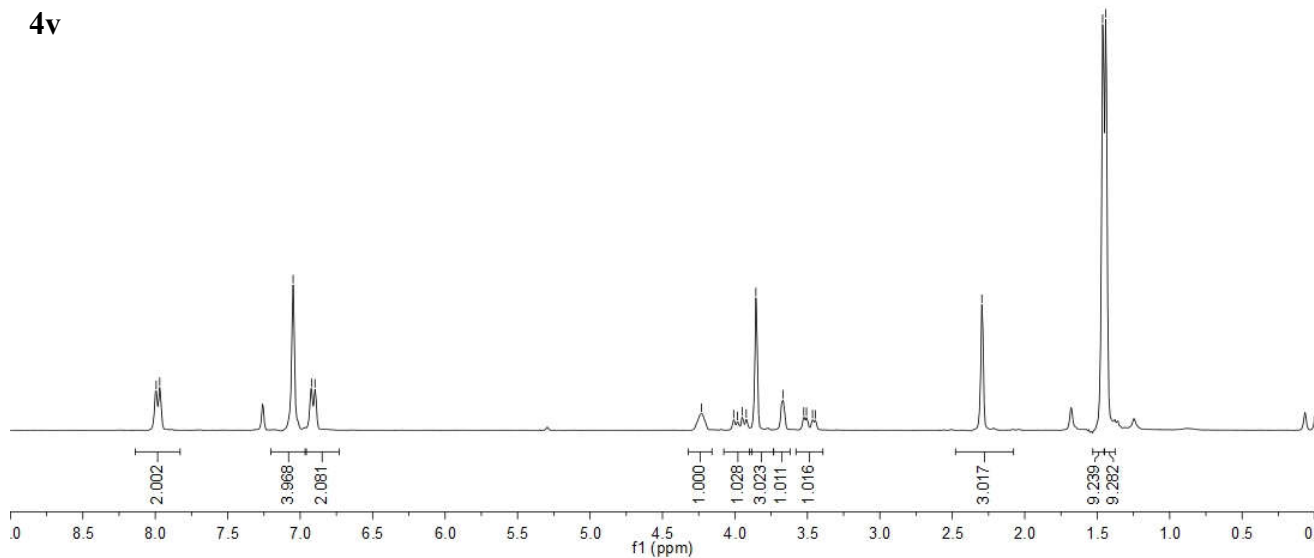

LY-3-6-C 75M NMR CDCL3

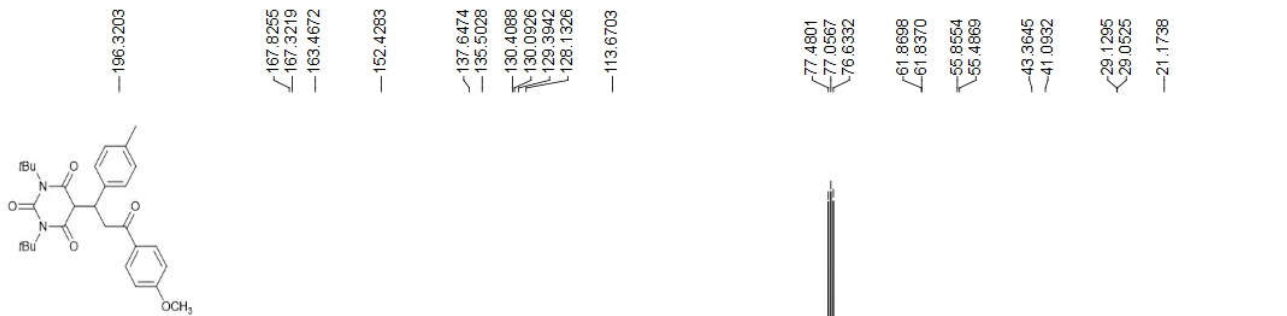

4v

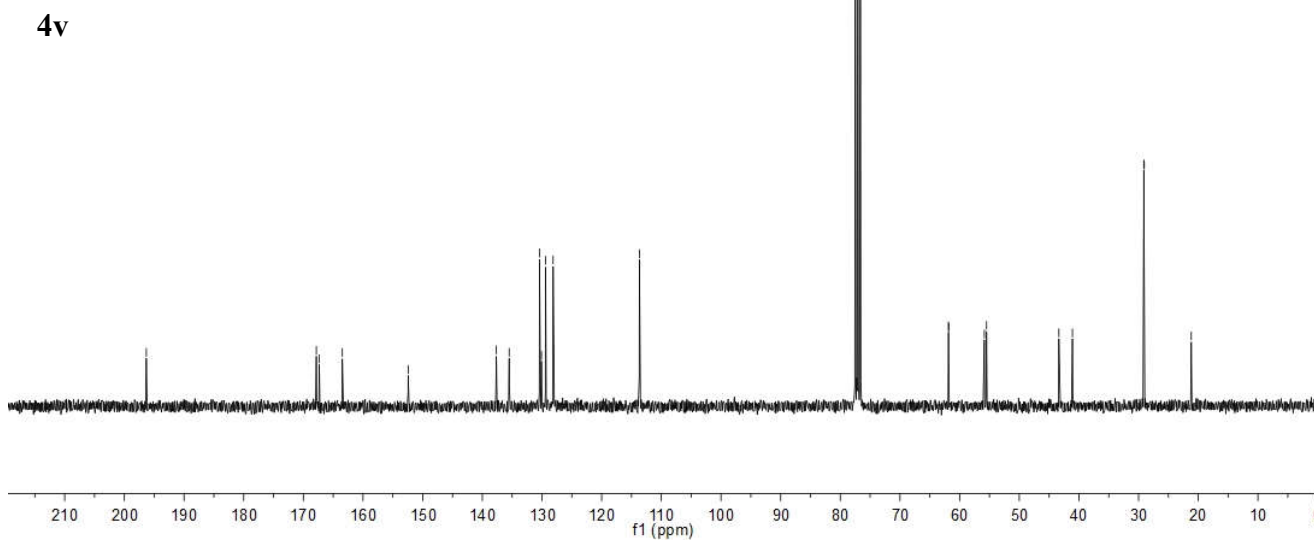

LY-3-9-1-H 300M NMR CDCl<sub>3</sub>

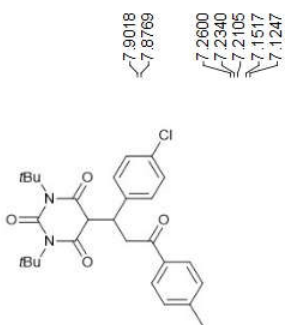

4w

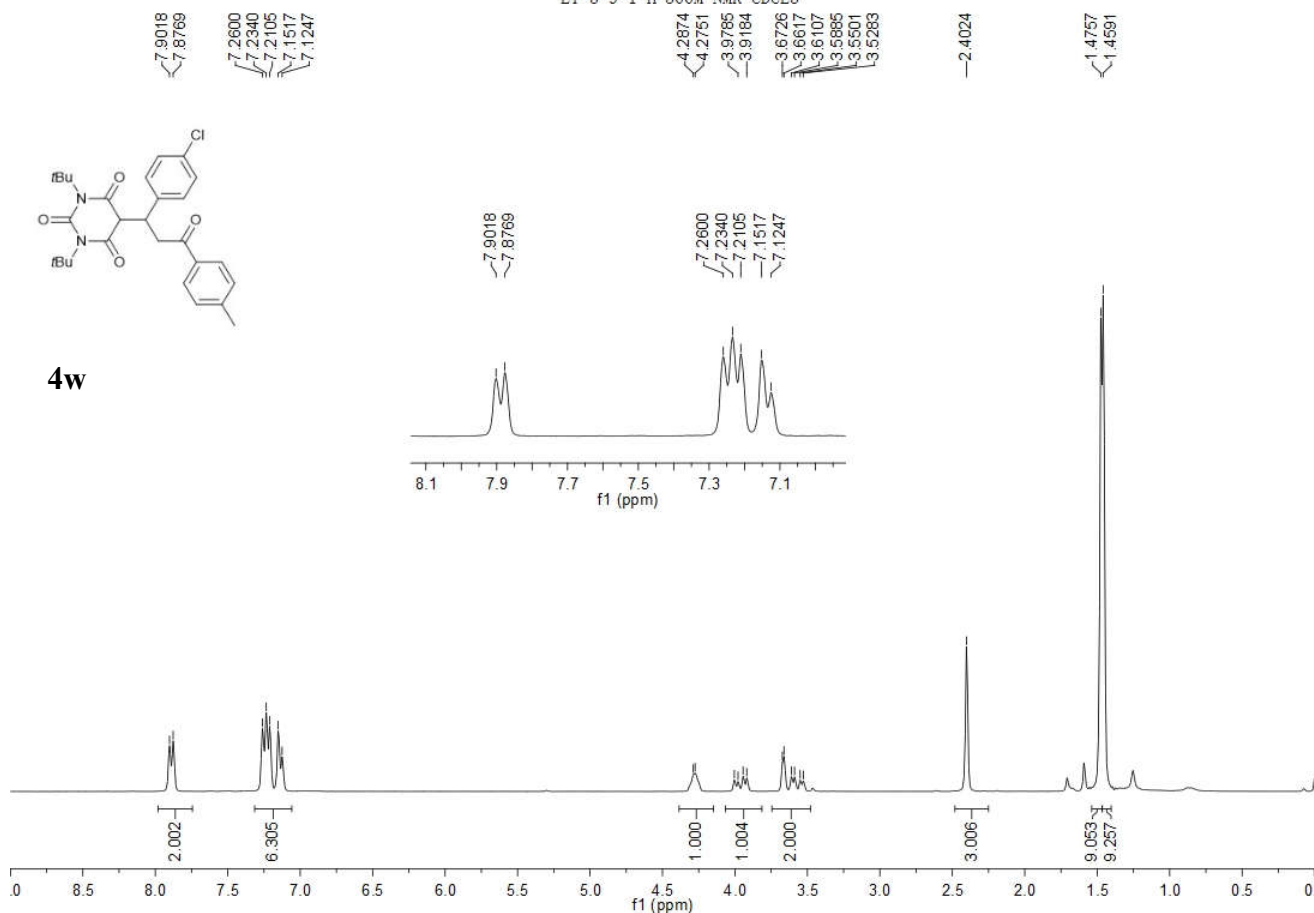

1y-3-9-1 75M NMR CDCl<sub>3</sub>

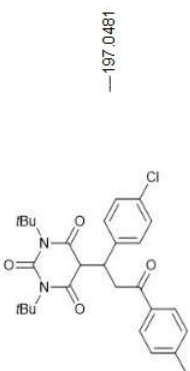

4w

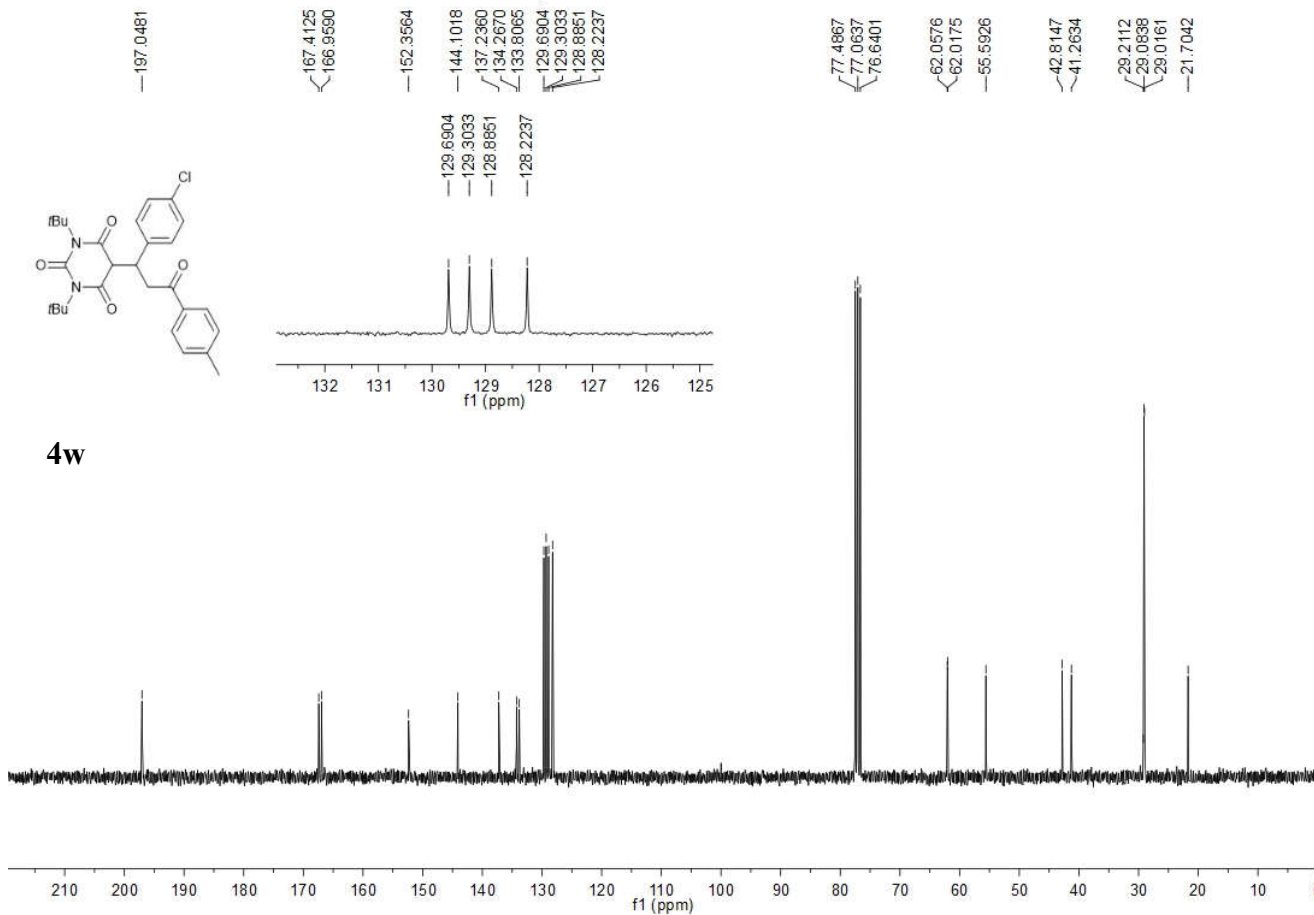

LY-3-9-2-H 300M NMR CDCL3

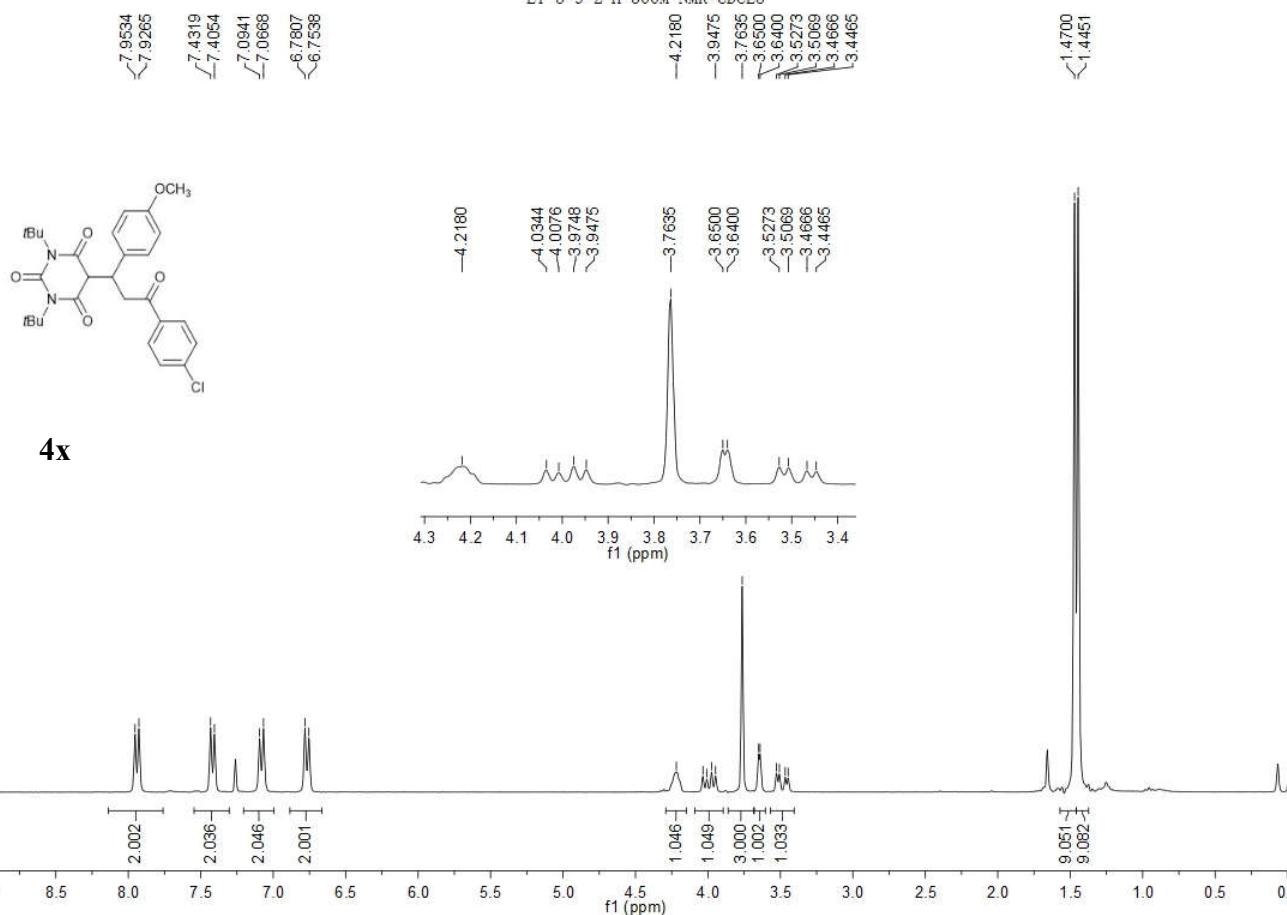

LY-3-9-2 75M NMR CDCL3

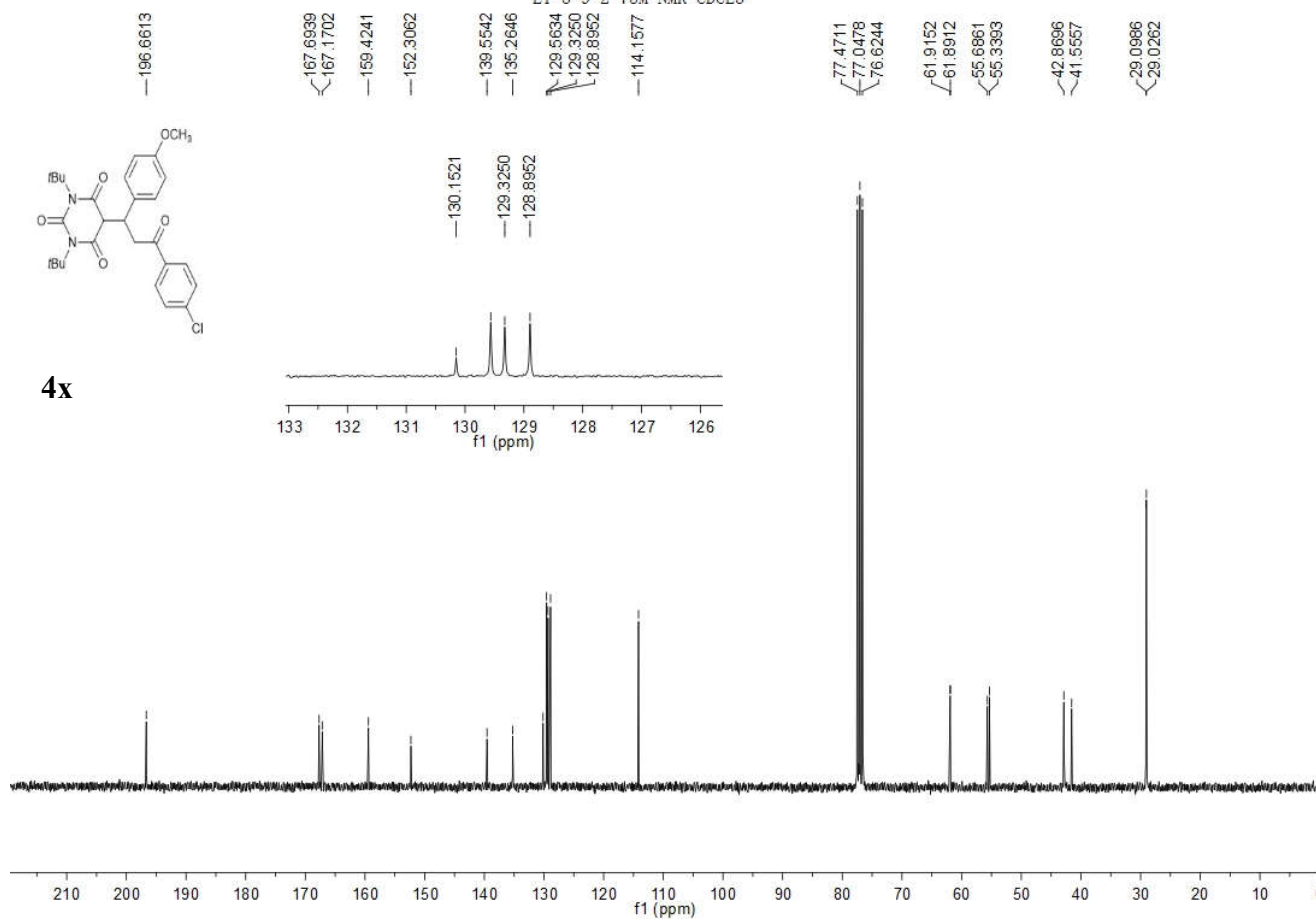

1y-3-11-1 300M NMR CDCL3

7.9948  
7.9669  
7.2602  
7.1807  
7.1591  
7.1426  
6.9612  
6.9341  
6.9066

4.2789  
3.9286  
3.9013  
3.8628  
3.6531  
3.5767  
3.5535  
3.5164  
3.4934

1.4679  
1.4517

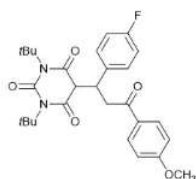

4y

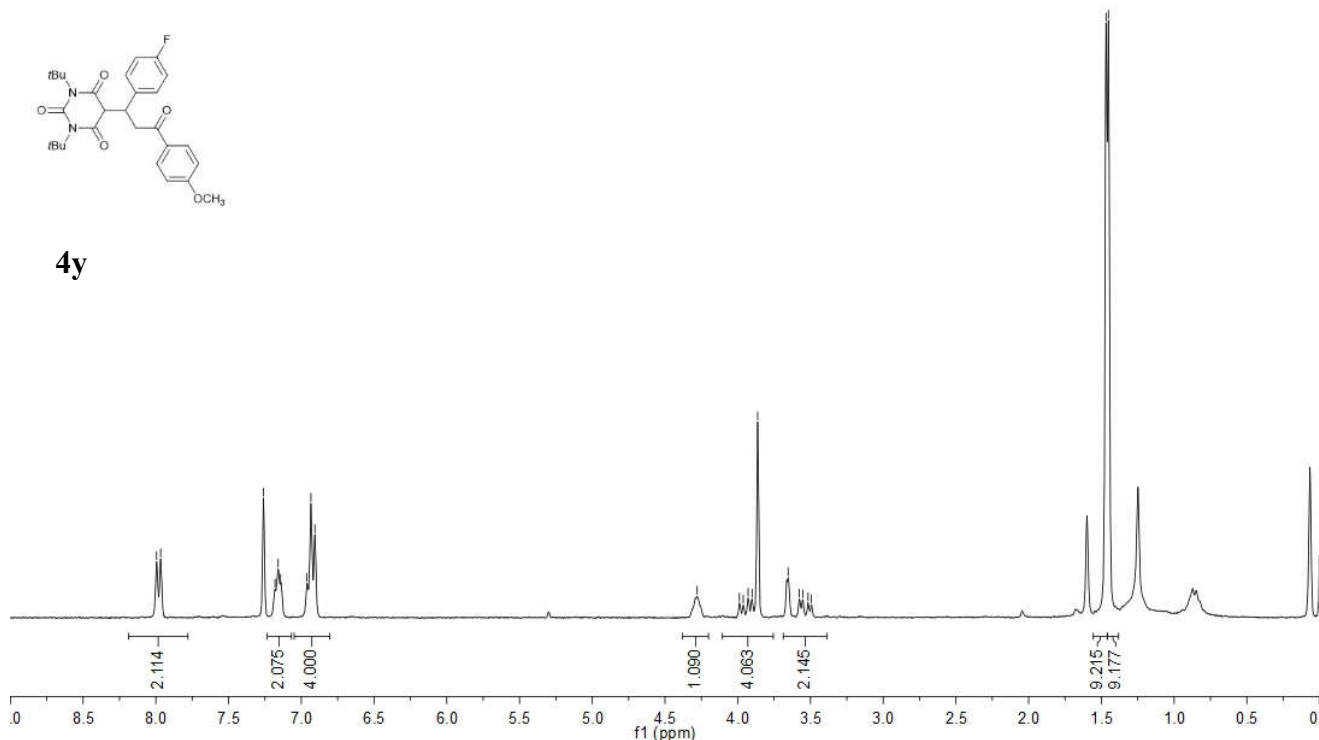

1y-3-11-1 75M NMR CDCL3

196.0234  
167.5403  
167.0010  
163.5841  
152.4072

134.3725  
130.4047  
129.9956  
129.8890  
115.7898  
115.5082  
113.7323

77.4675  
77.0441  
76.6207

62.0152  
61.9636  
55.5075

42.9470  
41.1082

29.0733  
29.0080

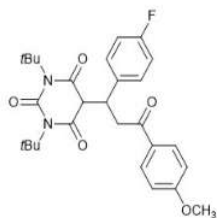

4y

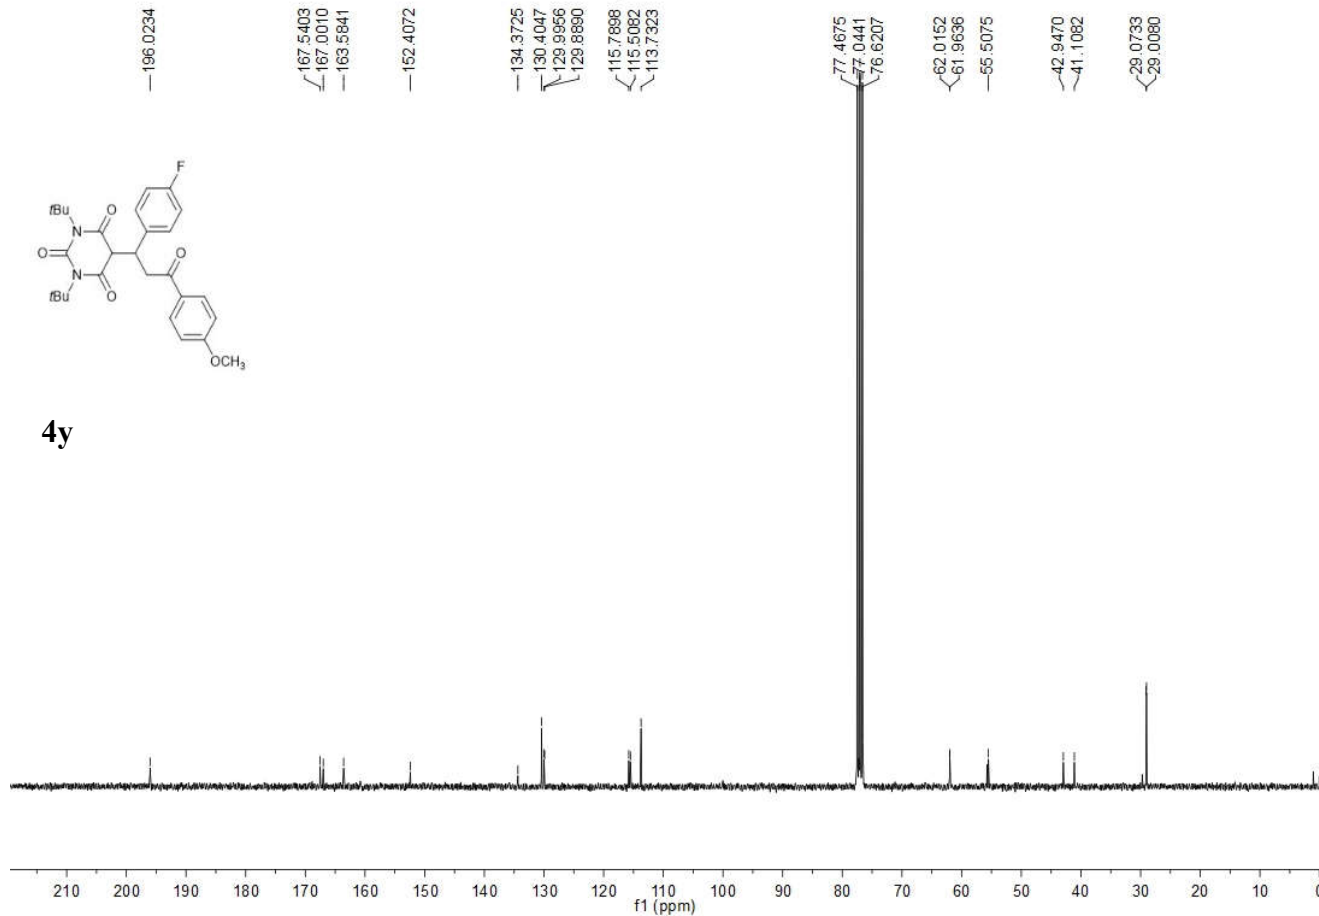

LY-3-11-2 300M NMR CDCL3

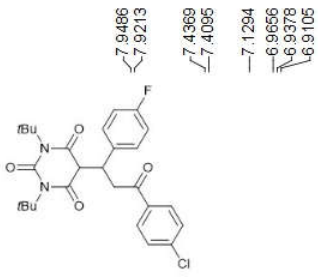

4z

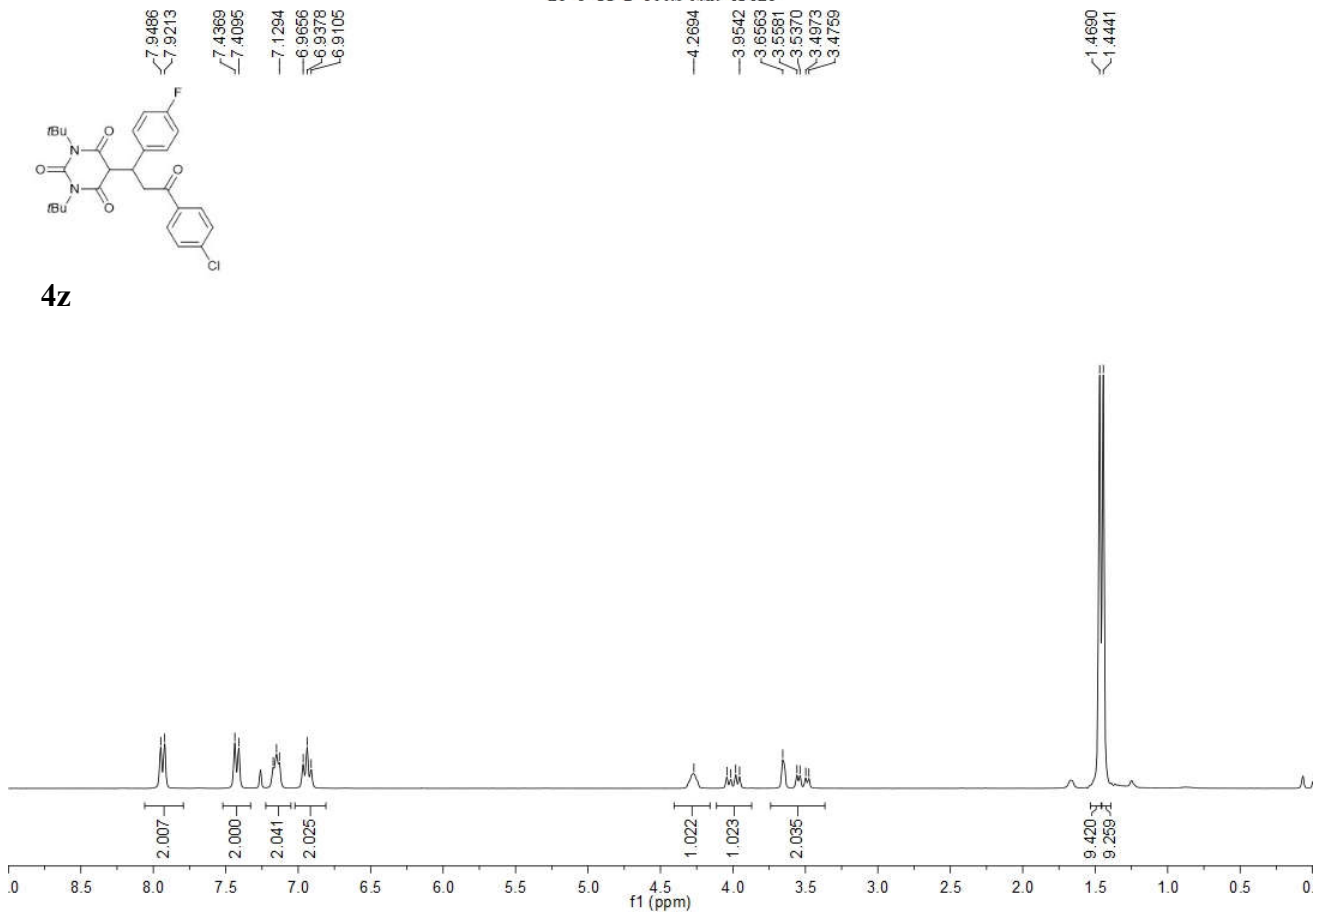

LY-3-11-2-c 75M NMR CDCL3

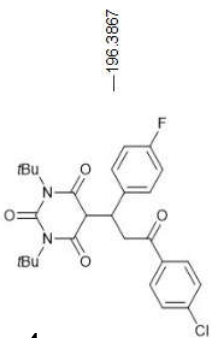

4z

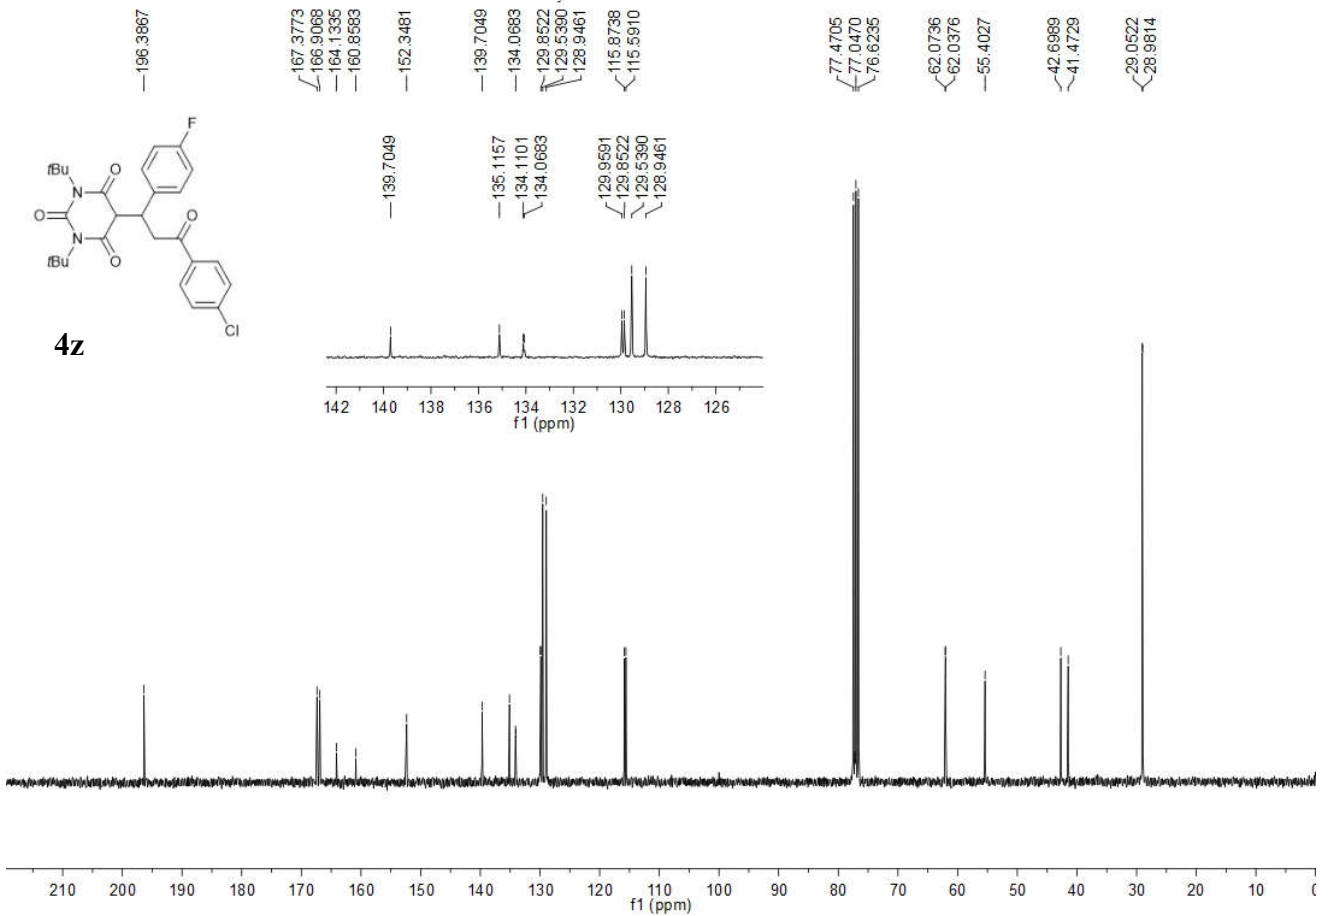



LY-3-33A 300M NMR CDCL3

7.9677  
7.9425  
7.5763  
7.5524  
7.5286  
7.4730  
7.4483  
7.4233

3.4897  
3.4558  
3.4270  
3.3945  
3.0726  
3.0248

1.5886  
1.5503  
1.4356  
1.3754  
1.3300  
1.3082  
1.2824  
1.2456  
0.9206  
0.8972

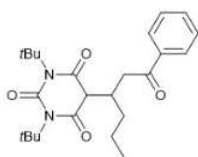

6a

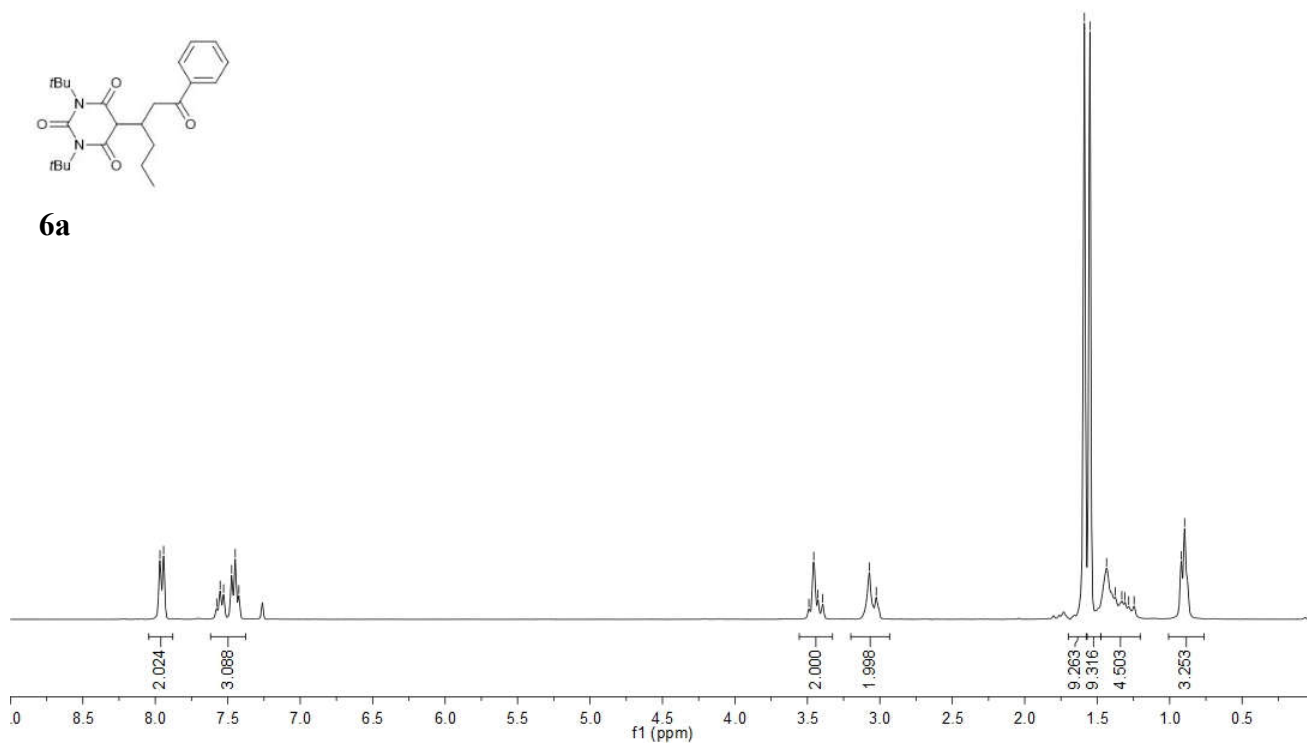

LY-3-33A 75M NMR CDC13

198.9715

169.0227  
168.2233

152.8169

136.9041  
133.1450  
128.6027  
128.0641

77.4886  
77.0652  
76.6417

61.7890  
61.6860

55.1047

40.0774

34.2562

29.3209

29.2029

20.3937

14.0168

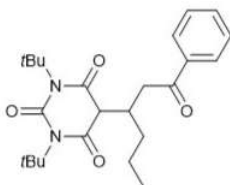

6a

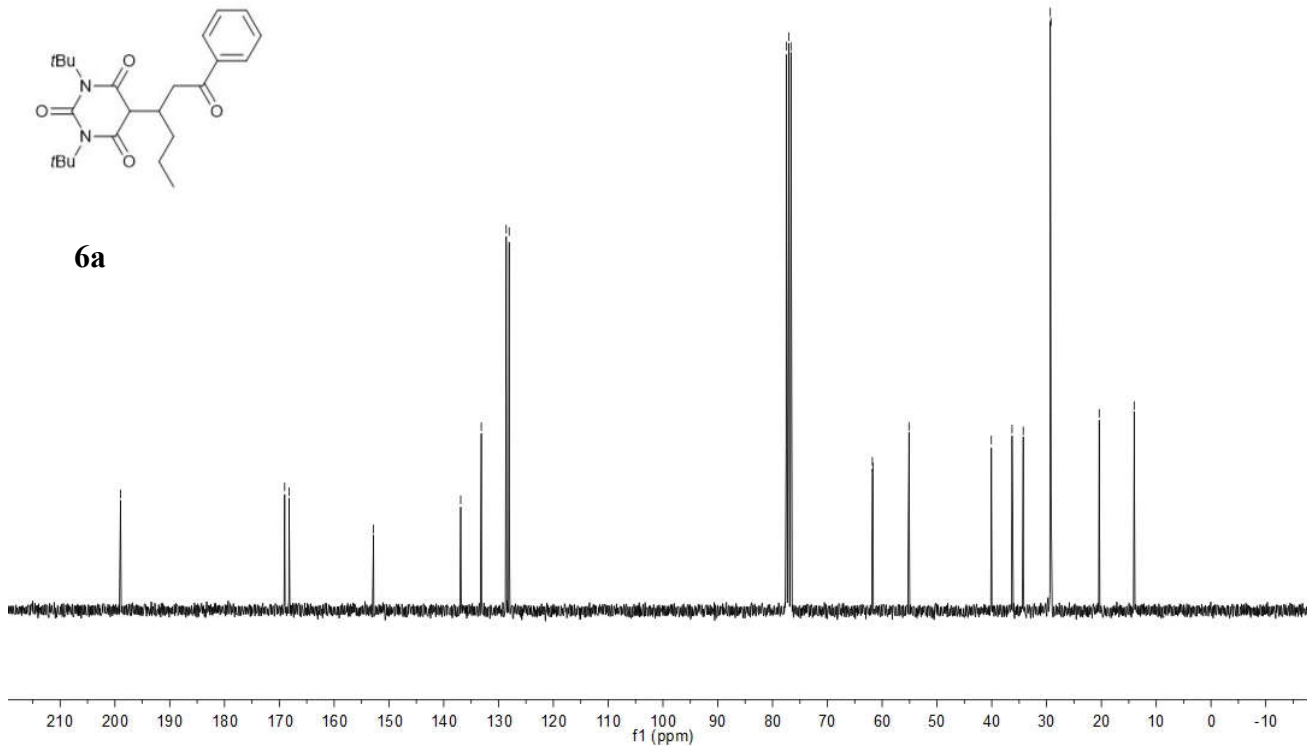

LY-3-27B 300M NMR CDCL3

7.9591  
7.9336  
7.5650  
7.5433  
7.5194  
7.4621  
7.4381  
7.4131

3.5056  
3.4727  
3.4443  
3.4127  
3.3711  
3.3544  
3.0841  
3.0235  
2.9504  
2.9348

1.7898  
1.7532  
1.6837  
1.6398  
1.6079  
1.5617  
1.4857  
1.3891  
1.2480  
1.2145  
1.1696  
1.1293  
1.1009  
1.0629  
1.0248  
0.9853  
0.8691  
0.8497

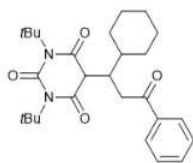

6b

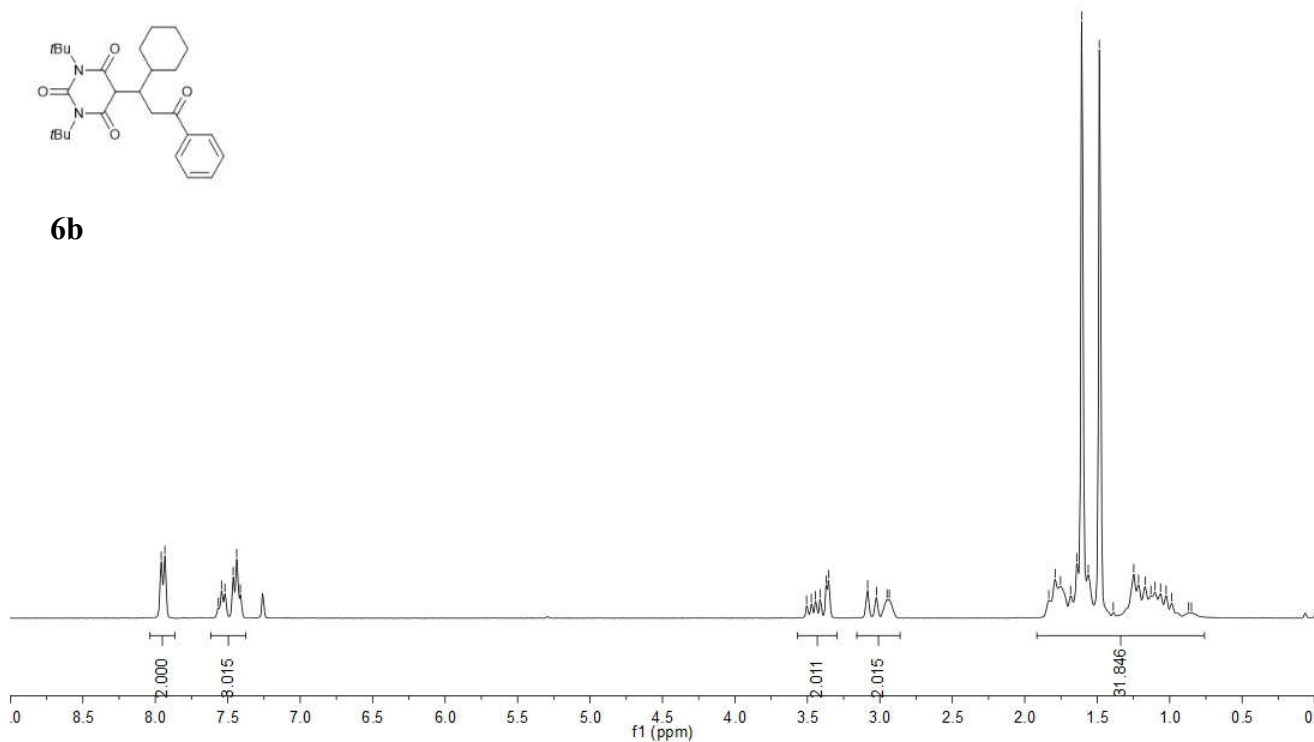

LY-3-27B 75M NMR CDCL3

199.0928

169.9765  
167.7812

153.0537

136.8426  
133.0686  
128.5503  
128.0625

77.4724  
77.0491  
76.6257

61.7075  
61.5154

54.3625

41.0448  
40.1192  
37.4377

31.7876  
29.3338  
29.1305  
26.6283  
26.4073  
26.3569

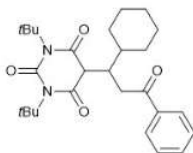

6b

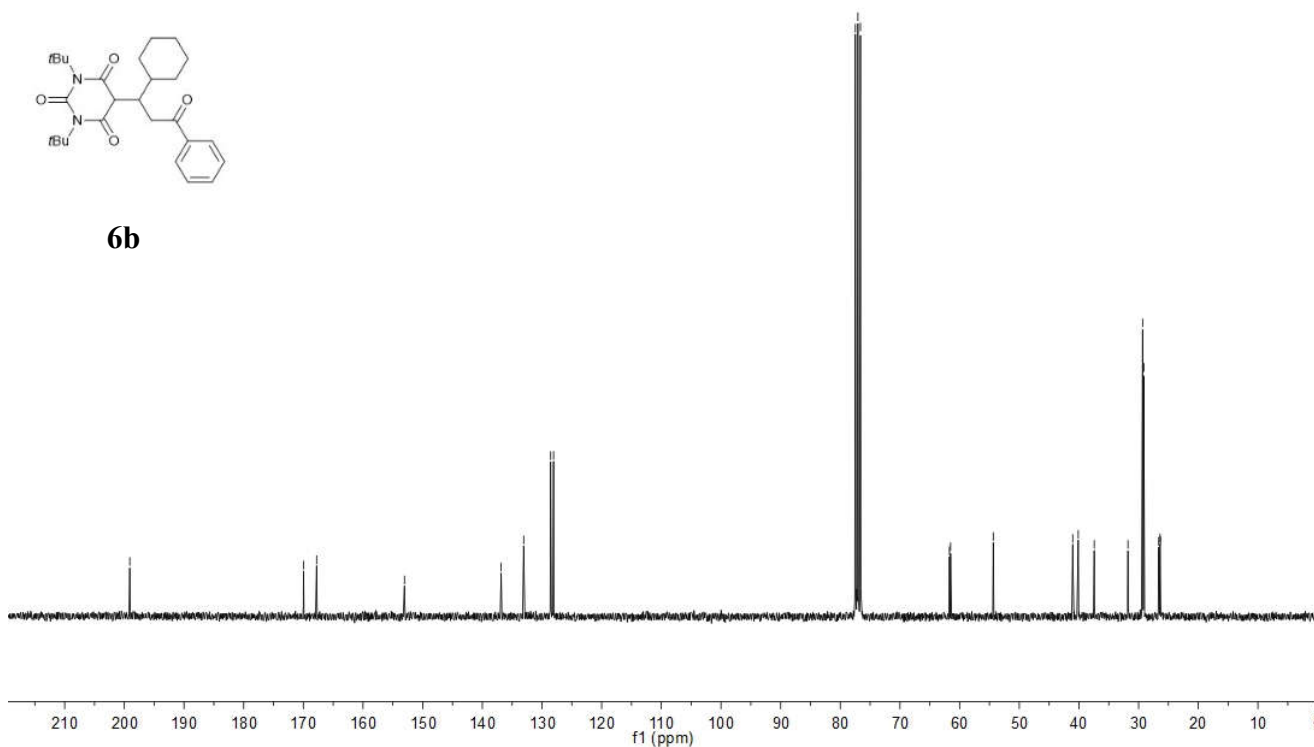

1y-3-37 300M NMR CDCl3

7.9578  
7.9337  
7.5625  
7.4777  
7.4549  
7.2509  
7.2484  
7.1670  
7.1452

3.5355  
3.4990  
3.4463  
3.1507  
3.1039  
2.6967  
2.6745  
2.6498  
2.6270  
1.8418  
1.8259  
1.7979  
1.7740  
1.5772  
1.5542

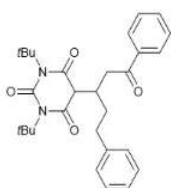

6c

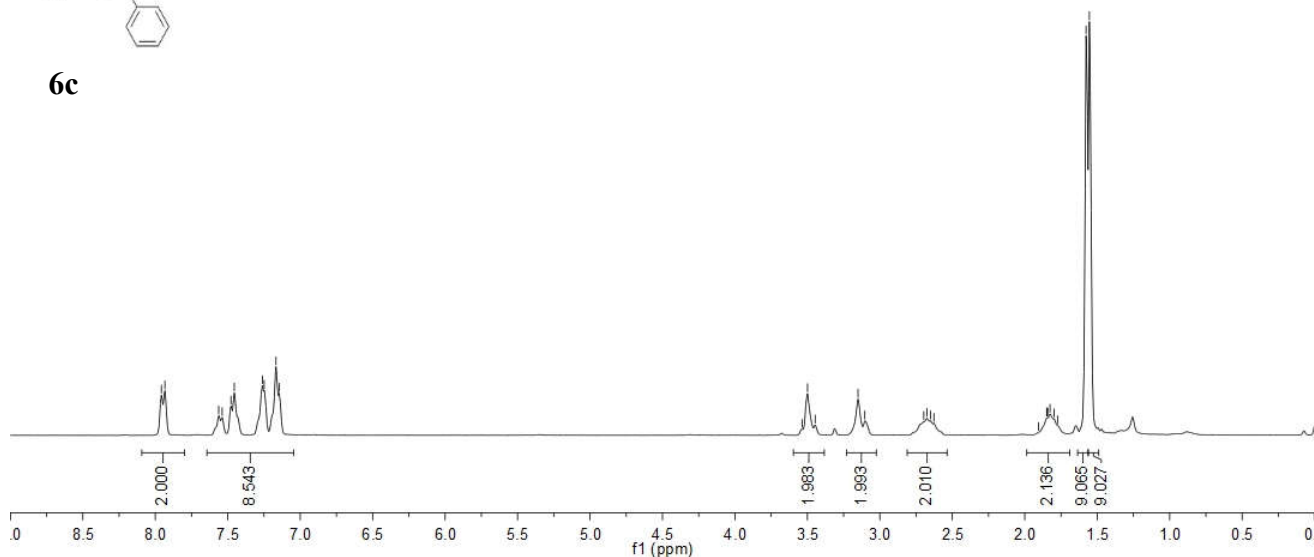

1y-3-37 1H in CDCl3 300M NMR

198.7709  
168.8266  
167.9199  
152.8087  
141.4297  
136.8306  
133.2195  
128.6373  
128.5104  
128.3091  
128.0826  
126.0536  
77.4847  
77.0612  
76.6380  
61.8743  
61.7837  
55.1048  
40.1272  
33.6987  
29.3244  
29.2235

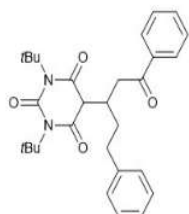

6c

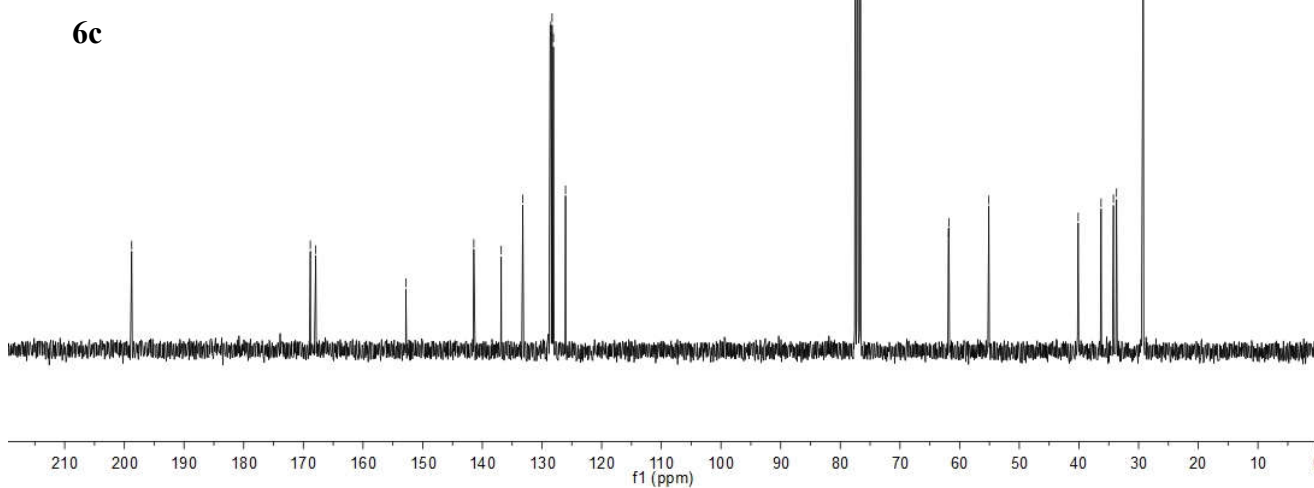

-7.2598

3.2184  
3.1958  
2.7275  
2.7076  
2.3403  
2.2555  
2.1634  
2.0902  
1.8763  
1.7863  
1.5746

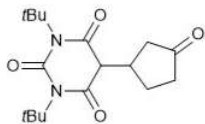

7

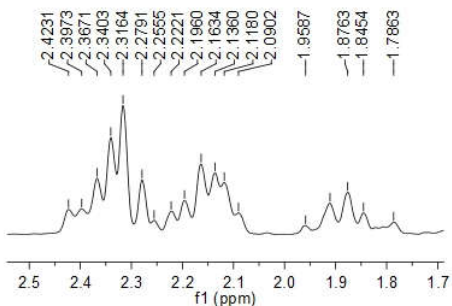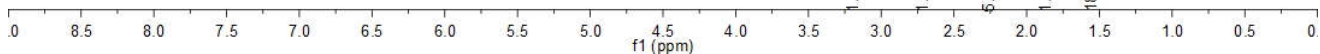

LY-3-21A-C 75M NMR CDCL3

-216.0149

167.5628  
167.3369

153.1660

77.4684  
77.0451  
76.6216

62.1634  
56.8012

42.1320  
36.6275  
36.2847

29.2491  
26.9643

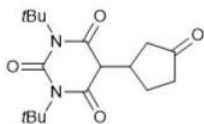

7

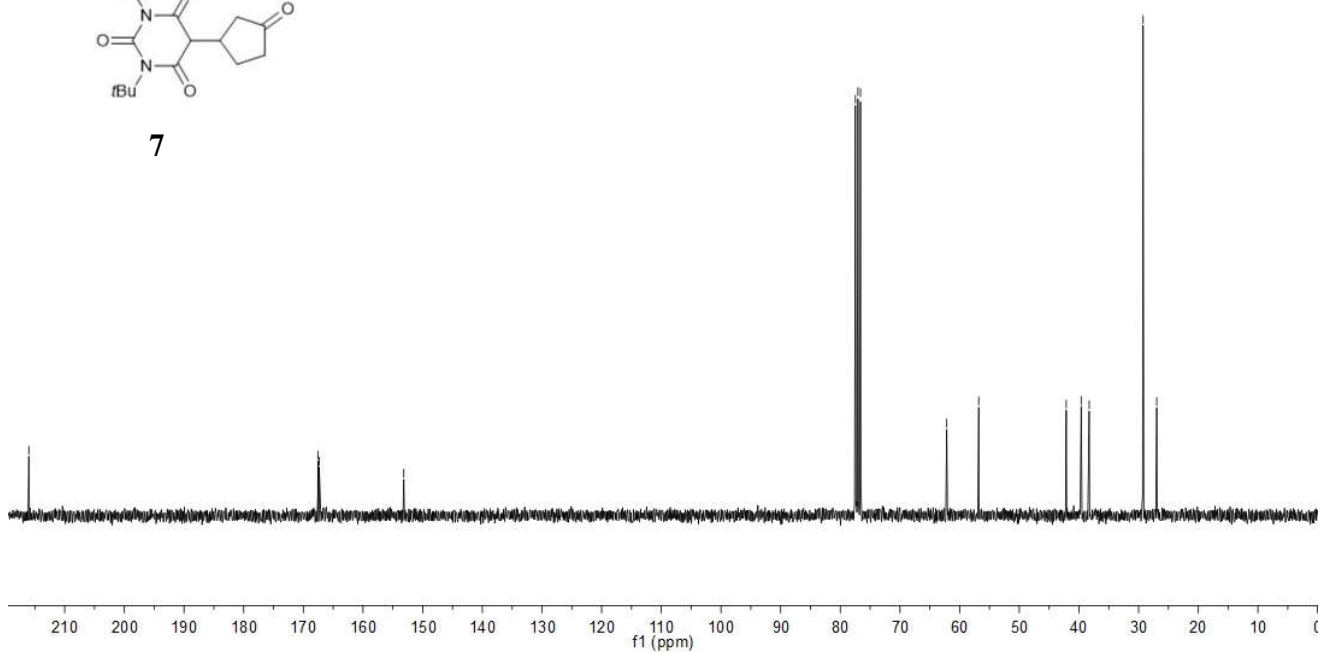

LY-3-Me 300M CDCL3 1H in NMR

7.9510  
7.9269  
7.5473  
7.5232  
7.4987  
7.4438  
7.4181  
7.3941  
7.2595  
7.2013  
7.1754  
7.1706

4.1702  
4.1565  
4.1361  
4.1245  
3.8998  
3.8675  
3.8400  
3.8078  
3.7630  
3.7493  
3.7033  
3.6895

1.5960  
1.5323  
1.3888

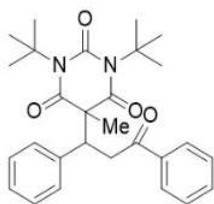

9

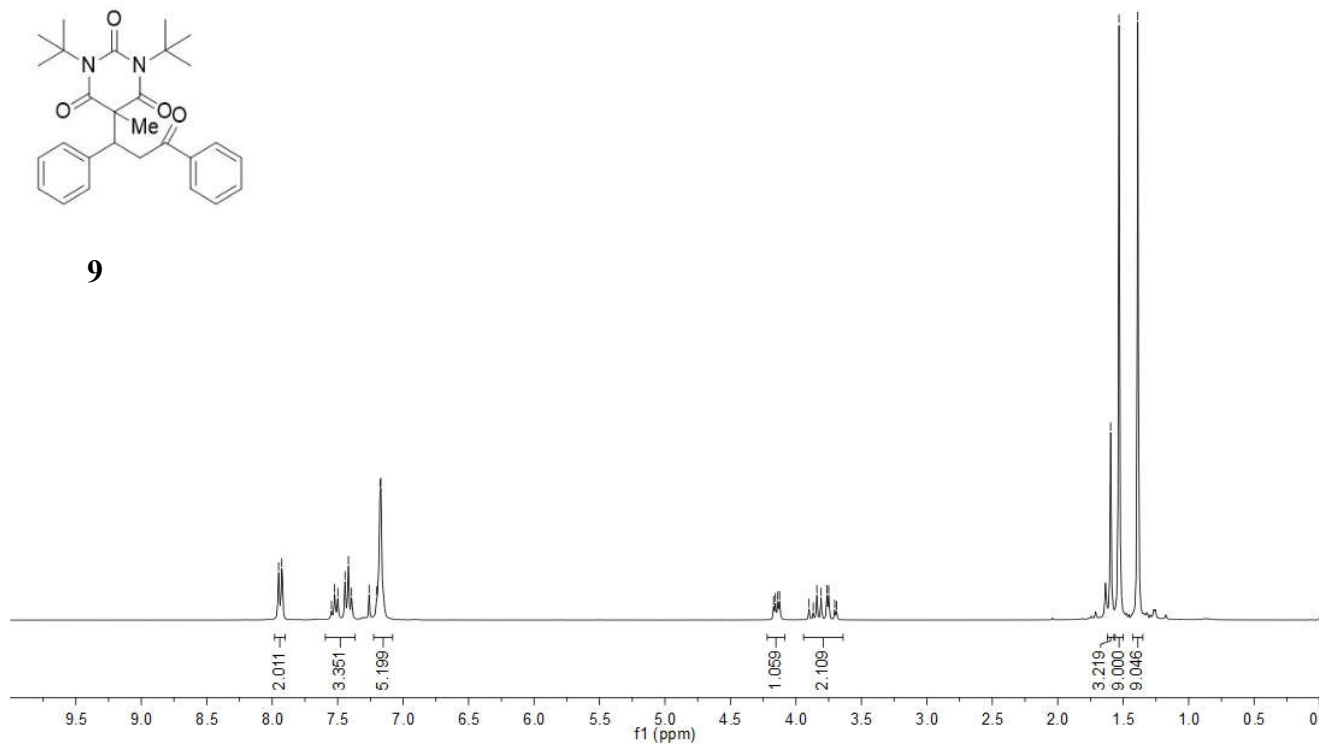

LY-3-Me 75M NMR CDCL3 1H in CDC13

197.8856

171.3833  
170.8855

151.6461

138.9518  
137.0362

132.9840

128.8928  
128.5711  
128.5106  
128.0522  
127.7314

77.4496  
77.0252  
76.6028

61.8039

56.4354

48.1598

39.1226

29.0463  
28.9218

23.4775

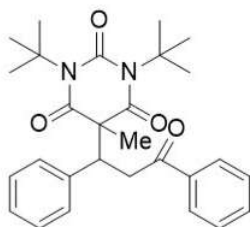

9

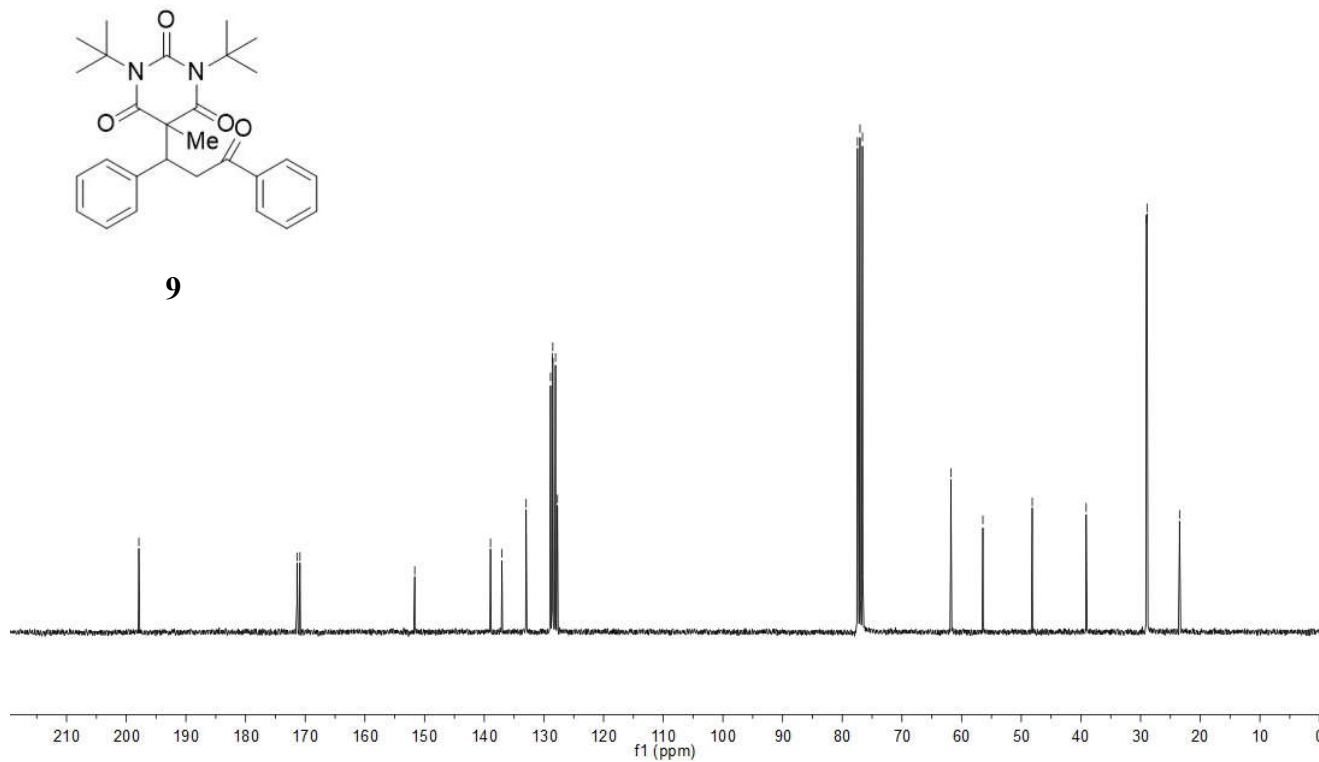

## Copy of HPLC for Chiral Michael Products

### HPLC for racemic and pure enantioenriched sample **3a**

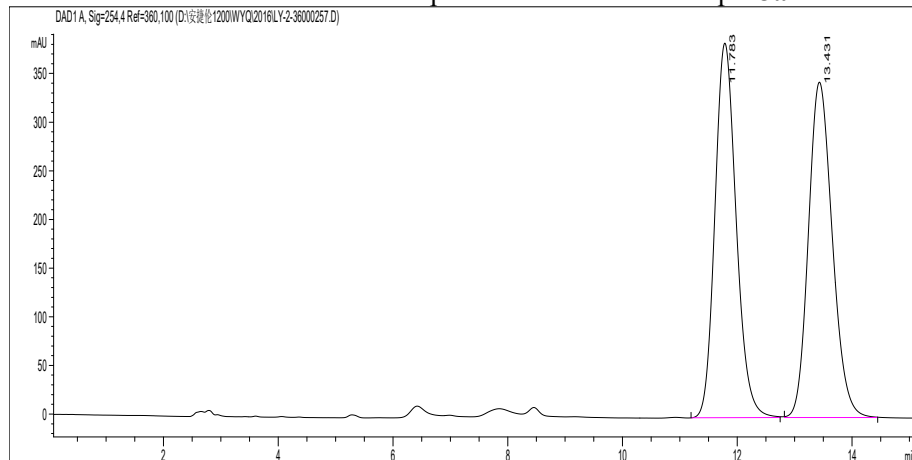

| 编号 | 时间     | 峰面积    | 峰高    | 峰宽     | 对称因子  | 峰面积 %  |
|----|--------|--------|-------|--------|-------|--------|
| 1  | 11.783 | 9907.3 | 385   | 0.3982 | 0.824 | 49.845 |
| 2  | 13.431 | 9968.8 | 344.8 | 0.4493 | 0.809 | 50.155 |

### HPLC for racemic and pure enantioenriched sample **3b**

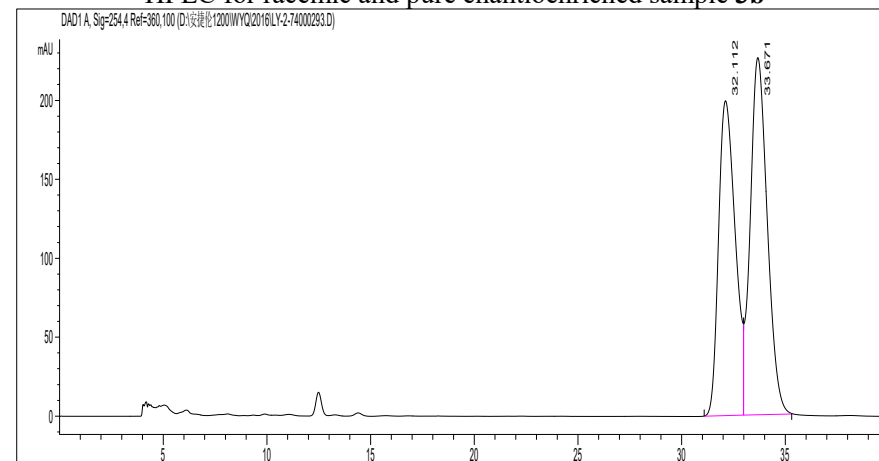

| 编号 | 时间     | 峰面积     | 峰高    | 峰宽     | 对称因子  | 峰面积 %  |
|----|--------|---------|-------|--------|-------|--------|
| 1  | 32.112 | 11170.3 | 199.5 | 0.8772 | 0.687 | 46.289 |
| 2  | 33.671 | 12961.2 | 226.4 | 0.8721 | 0.771 | 53.711 |

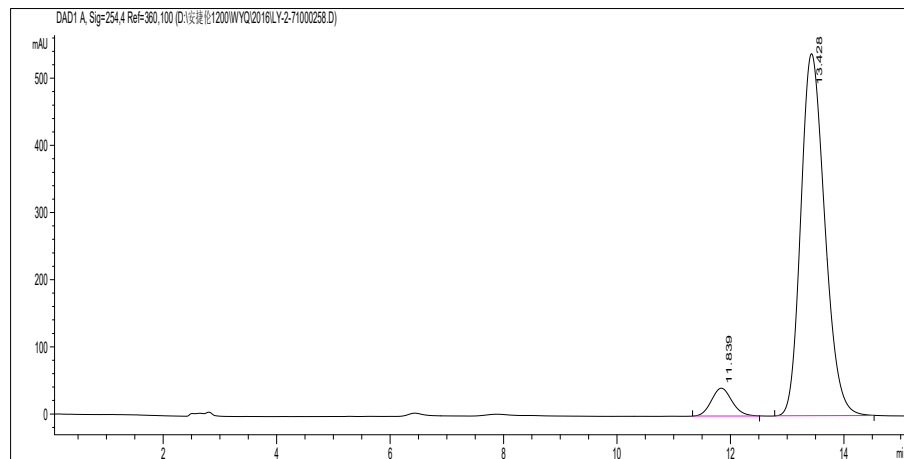

| 编号 | 时间     | 峰面积     | 峰高    | 峰宽     | 对称因子  | 峰面积 %  |
|----|--------|---------|-------|--------|-------|--------|
| 1  | 11.839 | 1059.8  | 41.7  | 0.3928 | 0.895 | 6.271  |
| 2  | 13.428 | 15839.3 | 539.4 | 0.4566 | 0.767 | 93.729 |

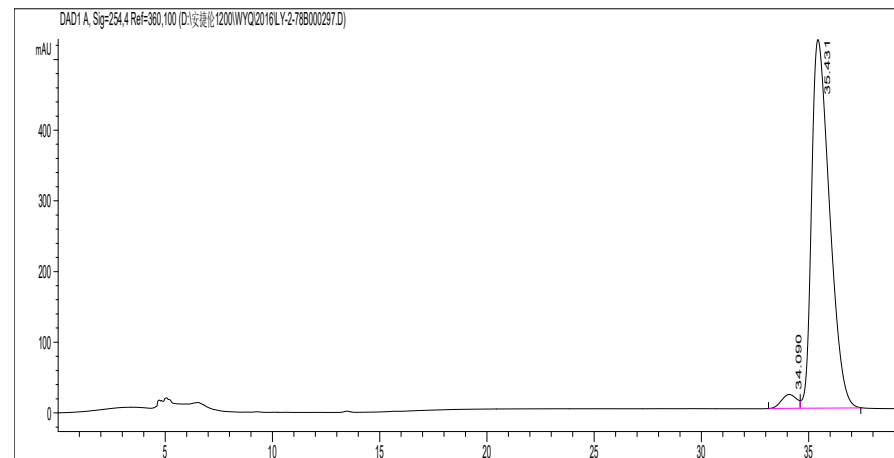

| 编号 | 时间     | 峰面积     | 峰高    | 峰宽     | 对称因子  | 峰面积 %  |
|----|--------|---------|-------|--------|-------|--------|
| 1  | 34.09  | 974.1   | 19.8  | 0.7232 | 1.045 | 3.097  |
| 2  | 35.431 | 30475.5 | 521.7 | 0.8995 | 0.523 | 96.903 |

HPLC for racemic and pure enantioenriched sample 3c

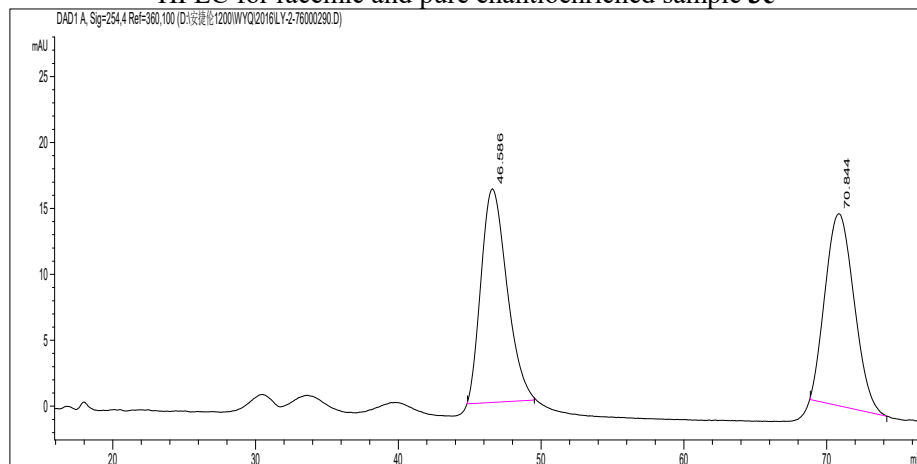

| 编号 | 时间     | 峰面积    | 峰高   | 峰宽     | 对称因子  | 峰面积 %  |
|----|--------|--------|------|--------|-------|--------|
| 1  | 46.586 | 2048   | 16.2 | 1.4912 | 0.75  | 49.926 |
| 2  | 70.844 | 2054.1 | 14.6 | 1.6584 | 0.853 | 50.074 |

HPLC for racemic and pure enantioenriched sample 4a

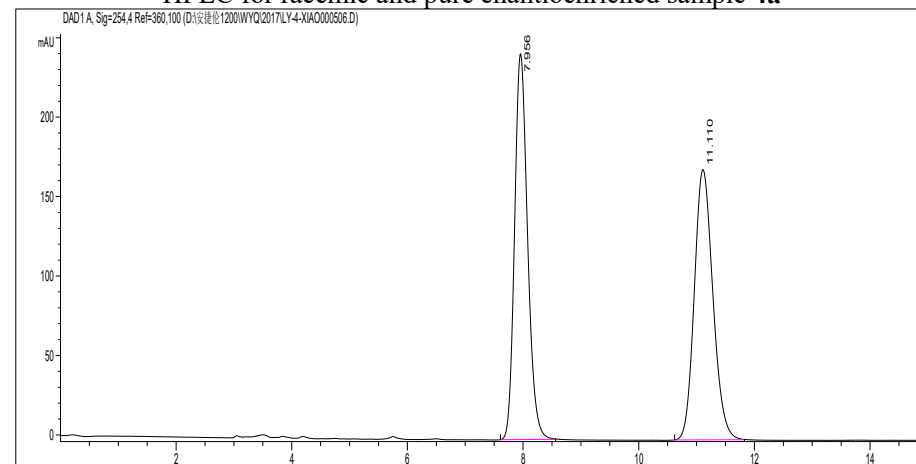

| 编号 | 时间    | 峰面积    | 峰高    | 峰宽     | 对称因子  | 峰面积 %  |
|----|-------|--------|-------|--------|-------|--------|
| 1  | 7.956 | 3790   | 243   | 0.24   | 0.793 | 49.916 |
| 2  | 11.11 | 3802.7 | 170.3 | 0.3445 | 0.822 | 50.084 |

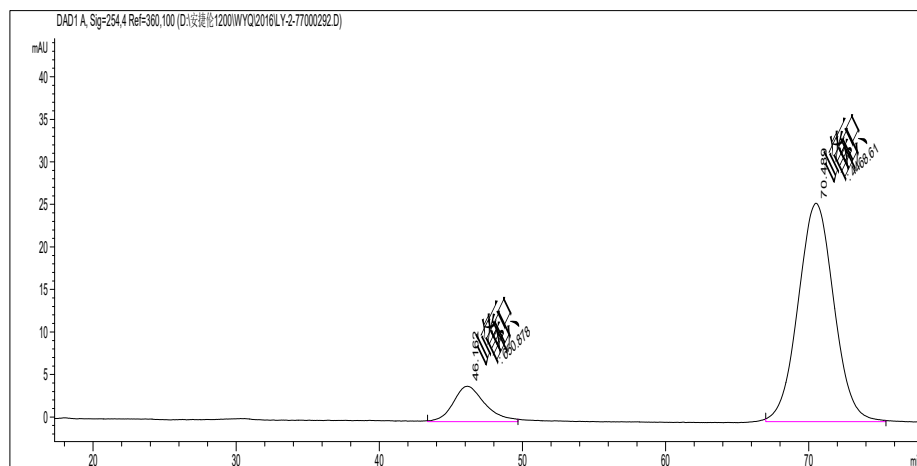

| 编号 | 时间     | 峰面积    | 峰高   | 峰宽     | 对称因子  | 峰面积 %  |
|----|--------|--------|------|--------|-------|--------|
| 1  | 46.162 | 650.9  | 4.2  | 2.5986 | 0.793 | 12.714 |
| 2  | 70.489 | 4468.6 | 25.7 | 2.8995 | 0.943 | 87.286 |

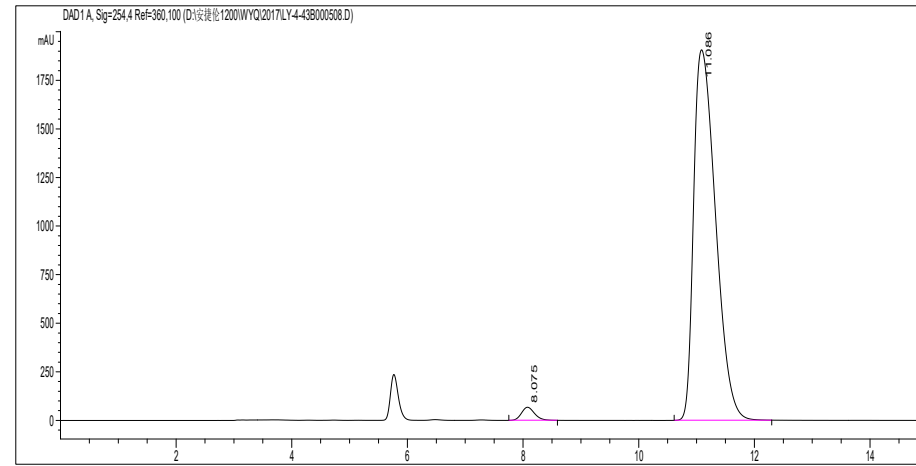

| 编号 | 时间     | 峰面积     | 峰高     | 峰宽     | 对称因子  | 峰面积 %  |
|----|--------|---------|--------|--------|-------|--------|
| 1  | 8.075  | 1069.5  | 67.6   | 0.2426 | 0.807 | 2.085  |
| 2  | 11.086 | 50235.8 | 1906.8 | 0.4154 | 0.536 | 97.915 |

HPLC for racemic and pure enantioenriched sample **4b**

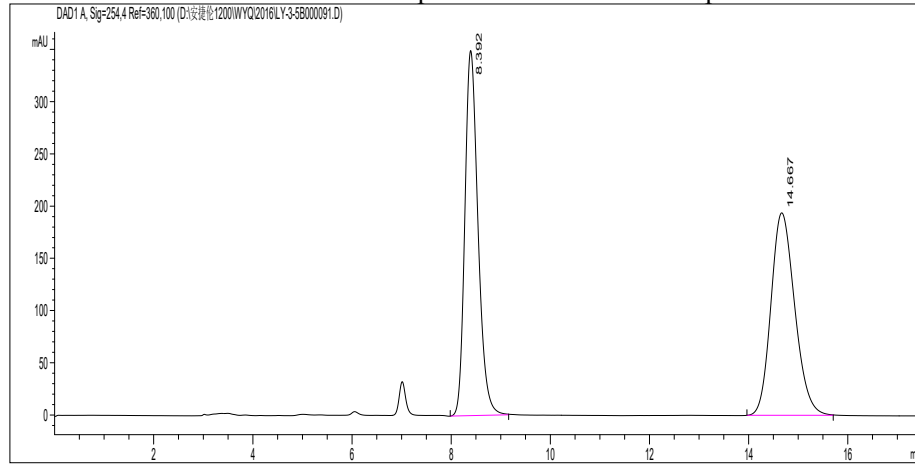

| 编号 | 时间     | 峰面积    | 峰高    | 峰宽     | 对称因子  | 峰面积 %  |
|----|--------|--------|-------|--------|-------|--------|
| 1  | 8.392  | 6427.2 | 349.5 | 0.2825 | 0.744 | 49.886 |
| 2  | 14.667 | 6456.6 | 193.9 | 0.5144 | 0.795 | 50.114 |

HPLC for racemic and pure enantioenriched sample **4c**

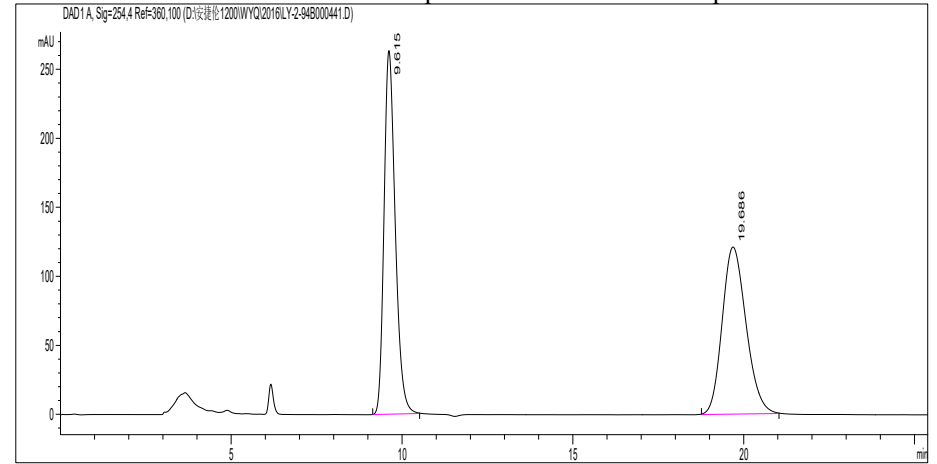

| 编号 | 时间     | 峰面积    | 峰高    | 峰宽     | 对称因子  | 峰面积 %  |
|----|--------|--------|-------|--------|-------|--------|
| 1  | 9.615  | 6014.7 | 263.6 | 0.3482 | 0.727 | 50.534 |
| 2  | 19.686 | 5887.5 | 121.2 | 0.7509 | 0.794 | 49.466 |

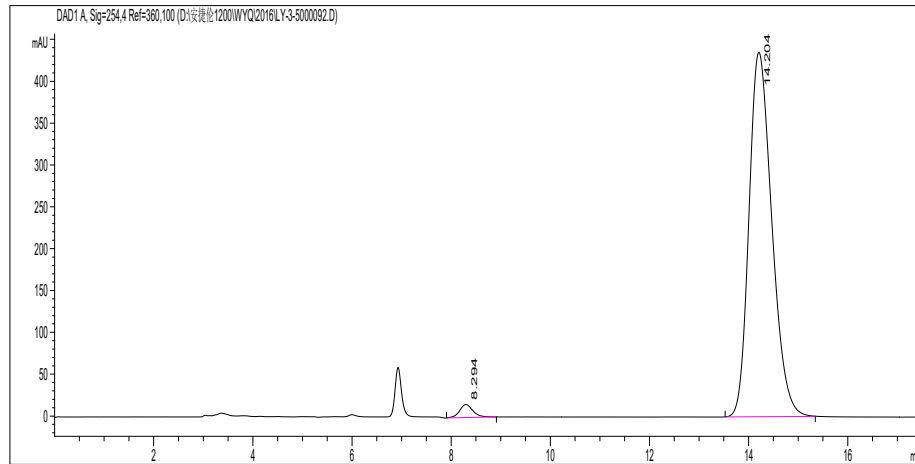

| 编号 | 时间     | 峰面积     | 峰高    | 峰宽     | 对称因子  | 峰面积 %  |
|----|--------|---------|-------|--------|-------|--------|
| 1  | 8.294  | 298.8   | 15.6  | 0.2888 | 0.829 | 2.099  |
| 2  | 14.204 | 13939.2 | 435.6 | 0.4953 | 0.725 | 97.901 |

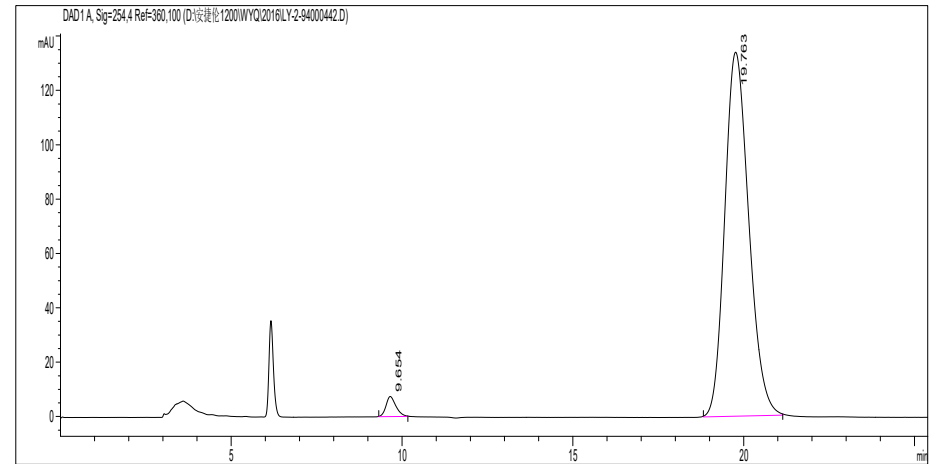

| 编号 | 时间     | 峰面积    | 峰高  | 峰宽     | 对称因子  | 峰面积 %  |
|----|--------|--------|-----|--------|-------|--------|
| 1  | 9.654  | 151.5  | 7.4 | 0.2979 | 0.703 | 2.263  |
| 2  | 19.763 | 6545.9 | 134 | 0.7541 | 0.784 | 97.737 |



HPLC for racemic and pure enantioenriched sample 4d

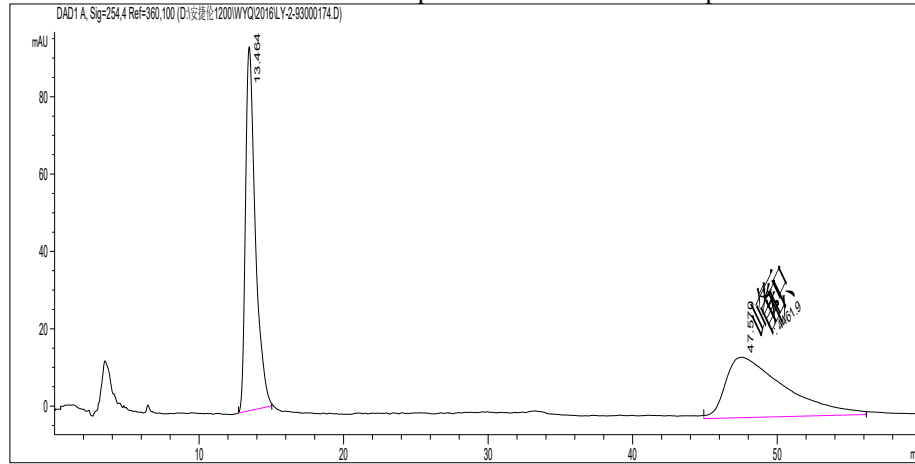

| 编号 | 时间     | 峰面积    | 峰高   | 峰宽     | 对称因子  | 峰面积 %  |
|----|--------|--------|------|--------|-------|--------|
| 1  | 13.464 | 4476.2 | 94.2 | 0.7027 | 0.56  | 50.080 |
| 2  | 47.57  | 4461.9 | 15.7 | 4.7505 | 0.382 | 49.920 |

HPLC for racemic and pure enantioenriched sample 4e

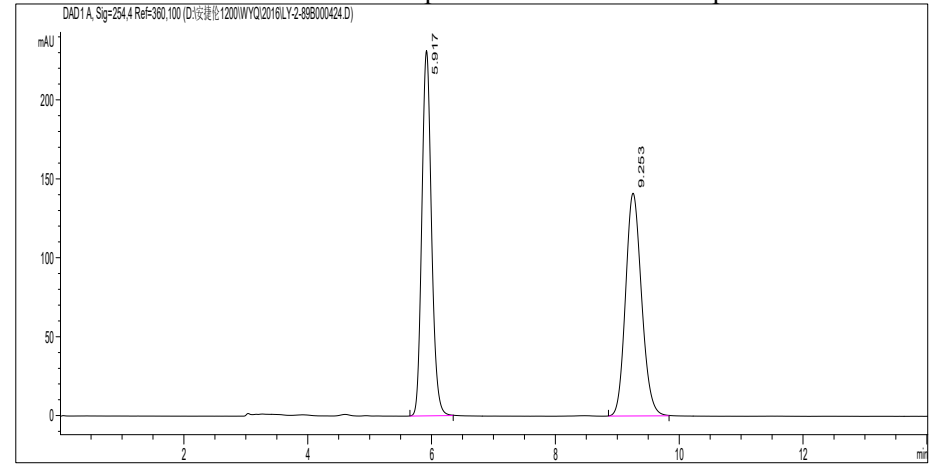

| 编号 | 时间    | 峰面积    | 峰高    | 峰宽     | 对称因子  | 峰面积 %  |
|----|-------|--------|-------|--------|-------|--------|
| 1  | 5.917 | 2509.8 | 231.5 | 0.1685 | 0.879 | 49.763 |
| 2  | 9.253 | 2533.7 | 141.2 | 0.2774 | 0.833 | 50.237 |

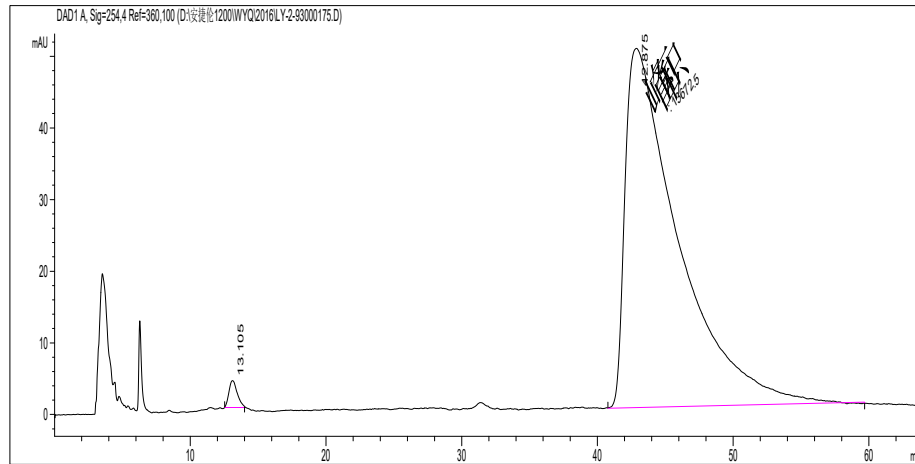

| 编号 | 时间     | 峰面积     | 峰高   | 峰宽     | 对称因子  | 峰面积 %  |
|----|--------|---------|------|--------|-------|--------|
| 1  | 13.105 | 161.6   | 3.8  | 0.5182 | 0.692 | 1.168  |
| 2  | 42.875 | 13672.5 | 50.1 | 4.5446 | 0.263 | 98.832 |

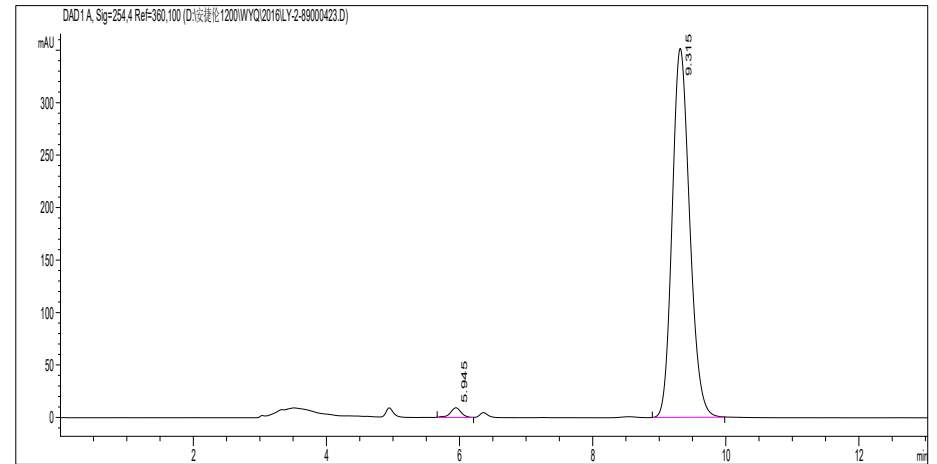

| 编号 | 时间    | 峰面积    | 峰高    | 峰宽     | 对称因子  | 峰面积 %  |
|----|-------|--------|-------|--------|-------|--------|
| 1  | 5.945 | 105.7  | 9.3   | 0.1731 | 1.056 | 1.617  |
| 2  | 9.315 | 6431.6 | 351.7 | 0.2834 | 0.806 | 98.383 |

HPLC for racemic and pure enantioenriched sample 4f

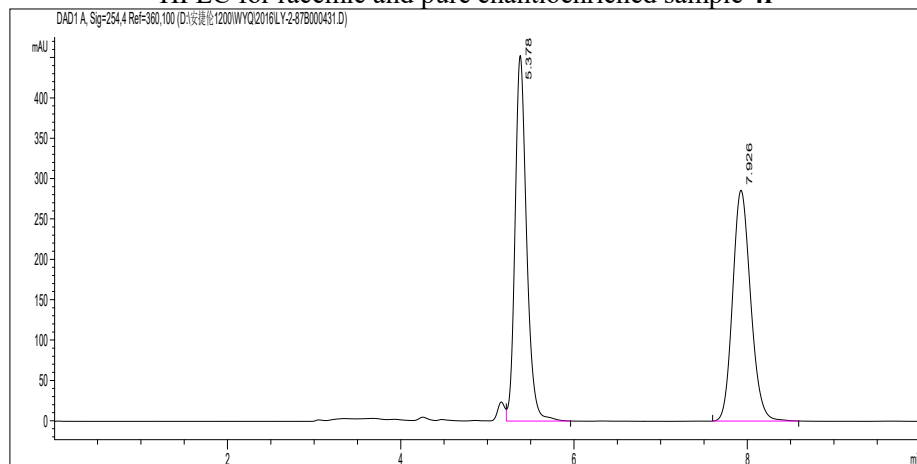

| 编号 | 时间    | 峰面积    | 峰高    | 峰宽     | 对称因子  | 峰面积 %  |
|----|-------|--------|-------|--------|-------|--------|
| 1  | 5.378 | 4190.4 | 453.4 | 0.1398 | 0.75  | 50.343 |
| 2  | 7.926 | 4133.4 | 286.1 | 0.2225 | 0.819 | 49.657 |

HPLC for racemic and pure enantioenriched sample 4g

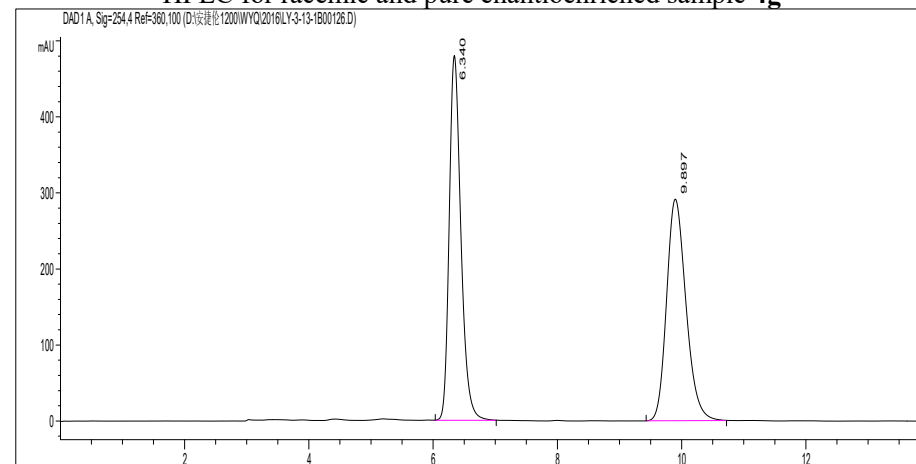

| 编号 | 时间    | 峰面积    | 峰高    | 峰宽     | 对称因子  | 峰面积 %  |
|----|-------|--------|-------|--------|-------|--------|
| 1  | 6.34  | 6268.8 | 479.9 | 0.2004 | 0.728 | 49.837 |
| 2  | 9.897 | 6309.8 | 291.5 | 0.3325 | 0.769 | 50.163 |

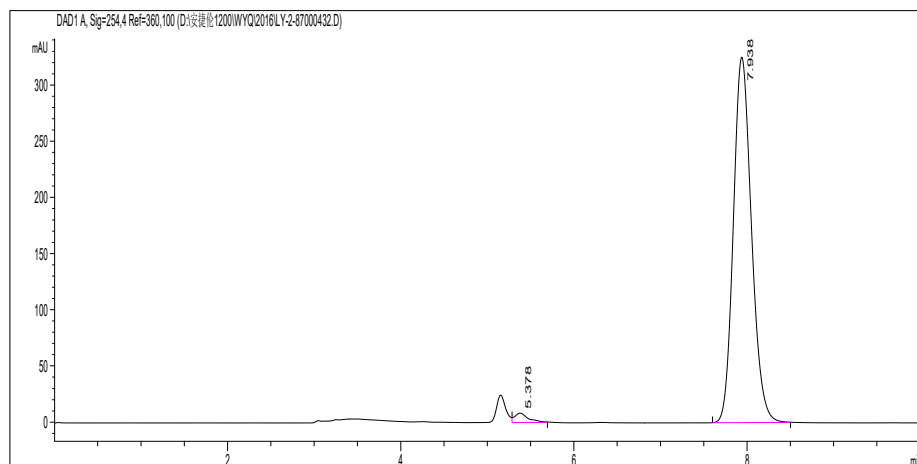

| 编号 | 时间    | 峰面积    | 峰高    | 峰宽     | 对称因子  | 峰面积 %  |
|----|-------|--------|-------|--------|-------|--------|
| 1  | 5.378 | 92.5   | 8.4   | 0.1585 | 0.578 | 1.919  |
| 2  | 7.938 | 4725.1 | 325.5 | 0.2254 | 0.817 | 98.081 |

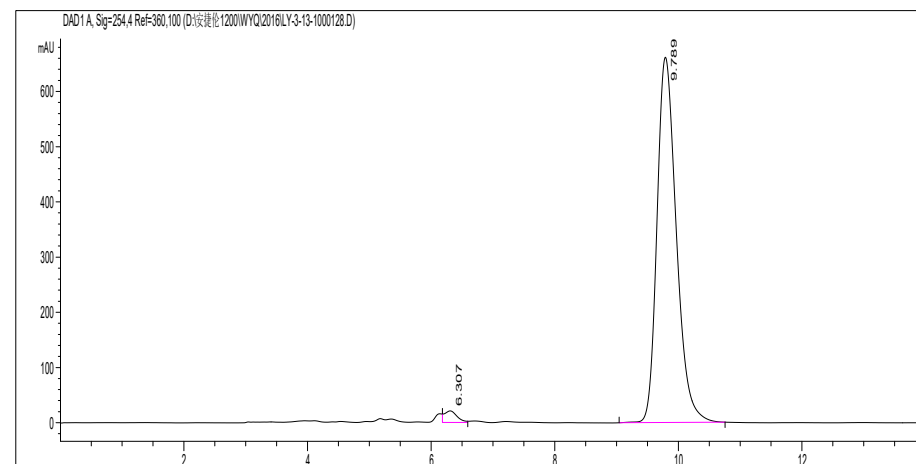

| 编号 | 时间    | 峰面积     | 峰高   | 峰宽     | 对称因子  | 峰面积 %  |
|----|-------|---------|------|--------|-------|--------|
| 1  | 6.307 | 307.6   | 21.3 | 0.2103 | 0.759 | 2.095  |
| 2  | 9.789 | 14373.4 | 662  | 0.3333 | 0.721 | 97.905 |

HPLC for racemic and pure enantioenriched sample 4h

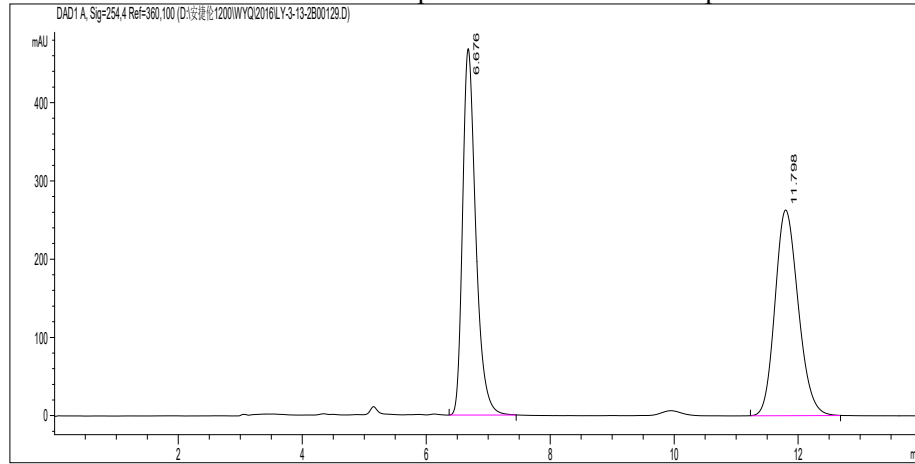

| 编号 | 时间     | 峰面积    | 峰高    | 峰宽     | 对称因子  | 峰面积 %  |
|----|--------|--------|-------|--------|-------|--------|
| 1  | 6.676  | 6923.8 | 468.3 | 0.2265 | 0.684 | 50.259 |
| 2  | 11.798 | 6852.5 | 262.9 | 0.404  | 0.806 | 49.741 |

HPLC for racemic and pure enantioenriched sample 4i

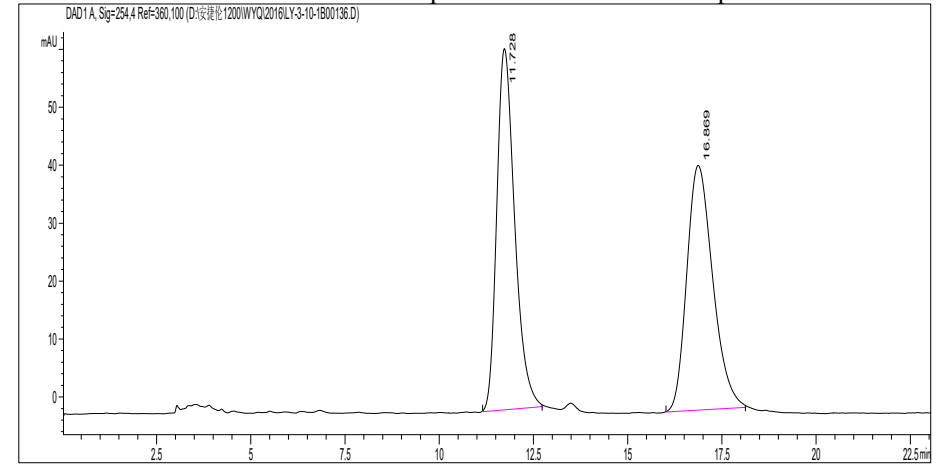

| 编号 | 时间     | 峰面积    | 峰高   | 峰宽     | 对称因子  | 峰面积 %  |
|----|--------|--------|------|--------|-------|--------|
| 1  | 11.728 | 2065.2 | 62.4 | 0.5063 | 0.699 | 50.432 |
| 2  | 16.869 | 2029.8 | 42.3 | 0.7281 | 0.742 | 49.568 |

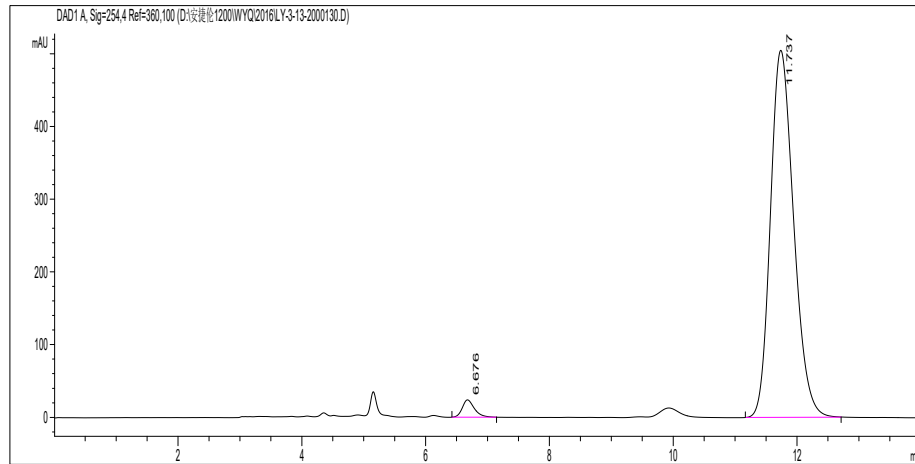

| 编号 | 时间     | 峰面积   | 峰高   | 峰宽     | 对称因子  | 峰面积 %  |
|----|--------|-------|------|--------|-------|--------|
| 1  | 6.676  | 333.2 | 24.1 | 0.2073 | 0.709 | 2.468  |
| 2  | 11.737 | 13165 | 505  | 0.4041 | 0.763 | 97.532 |

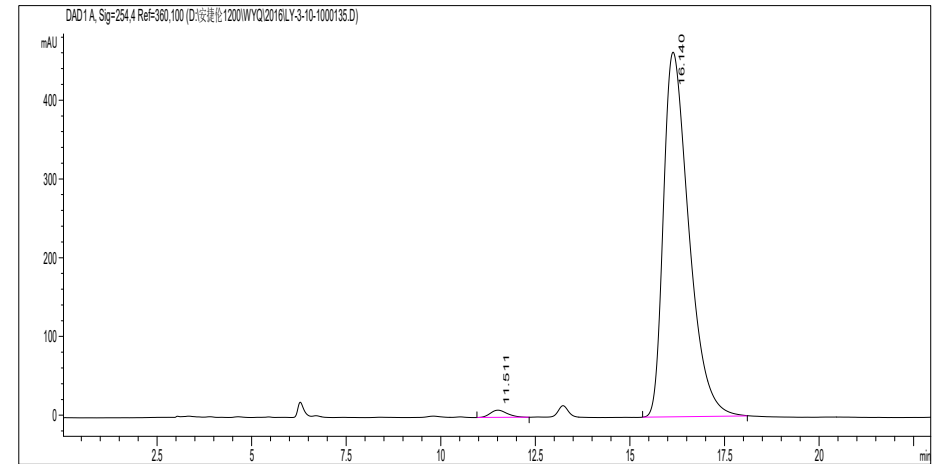

| 编号 | 时间     | 峰面积     | 峰高    | 峰宽     | 对称因子  | 峰面积 %  |
|----|--------|---------|-------|--------|-------|--------|
| 1  | 11.511 | 289.4   | 9.2   | 0.4656 | 0.789 | 1.319  |
| 2  | 16.14  | 21654.4 | 463.1 | 0.7136 | 0.571 | 98.681 |

HPLC for racemic and pure enantioenriched sample 4j

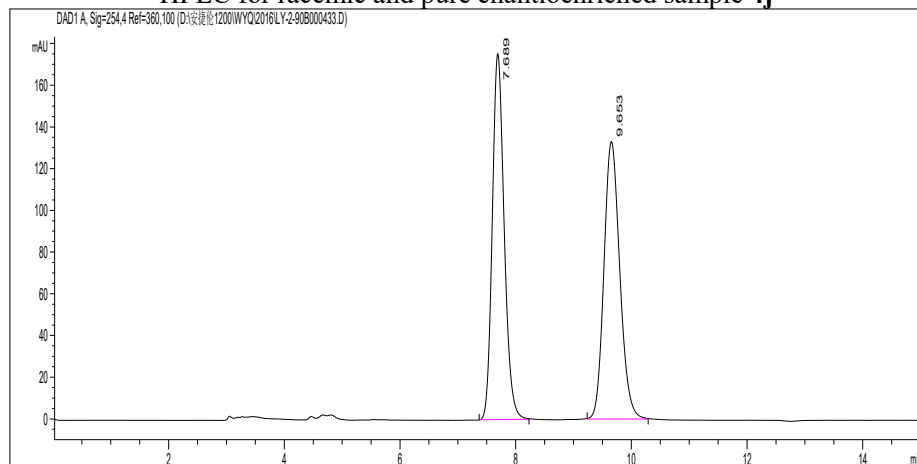

| 编号 | 时间    | 峰面积    | 峰高    | 峰宽     | 对称因子  | 峰面积 %  |
|----|-------|--------|-------|--------|-------|--------|
| 1  | 7.689 | 2507.4 | 175.5 | 0.2186 | 0.803 | 49.734 |
| 2  | 9.653 | 2534.3 | 133.1 | 0.2941 | 0.83  | 50.266 |

HPLC for racemic and pure enantioenriched sample 4k

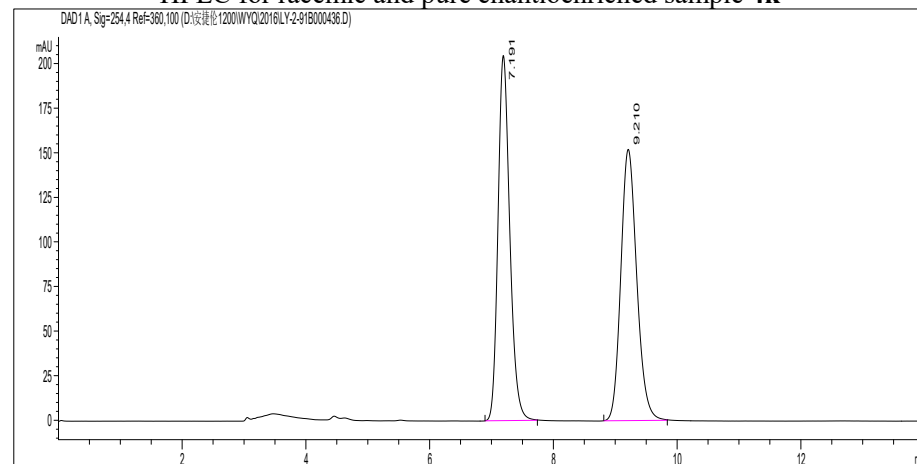

| 编号 | 时间    | 峰面积    | 峰高    | 峰宽     | 对称因子  | 峰面积 %  |
|----|-------|--------|-------|--------|-------|--------|
| 1  | 7.191 | 2712.1 | 204.9 | 0.2024 | 0.773 | 49.904 |
| 2  | 9.21  | 2722.5 | 152.3 | 0.2746 | 0.82  | 50.096 |

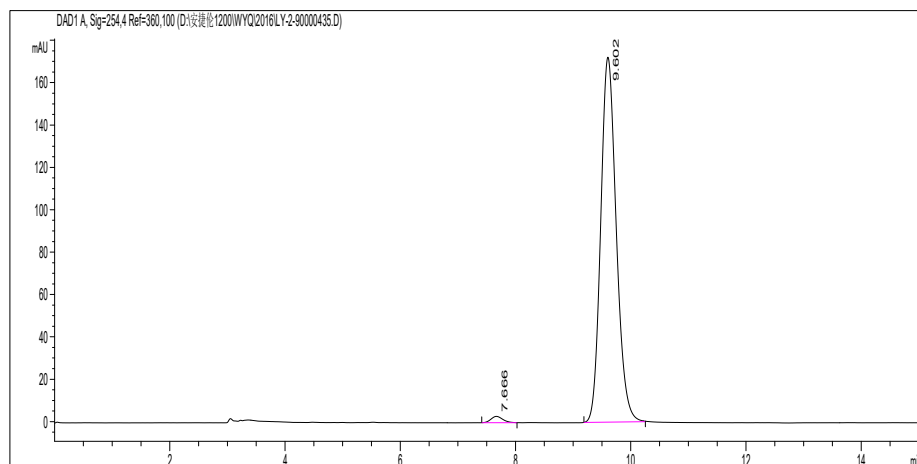

| 编号 | 时间    | 峰面积    | 峰高    | 峰宽     | 对称因子  | 峰面积 %  |
|----|-------|--------|-------|--------|-------|--------|
| 1  | 7.666 | 42.6   | 3     | 0.2162 | 0.804 | 1.300  |
| 2  | 9.602 | 3232.5 | 172.4 | 0.2888 | 0.819 | 98.700 |

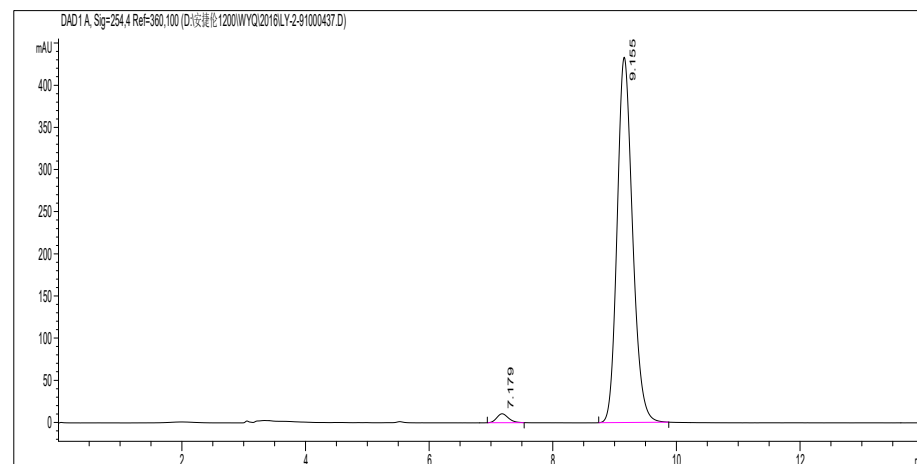

| 编号 | 时间    | 峰面积    | 峰高    | 峰宽     | 对称因子  | 峰面积 %  |
|----|-------|--------|-------|--------|-------|--------|
| 1  | 7.179 | 143.3  | 10.7  | 0.2042 | 0.789 | 1.871  |
| 2  | 9.155 | 7516.9 | 433.6 | 0.2663 | 0.799 | 98.129 |

HPLC for racemic and pure enantioenriched sample 4l

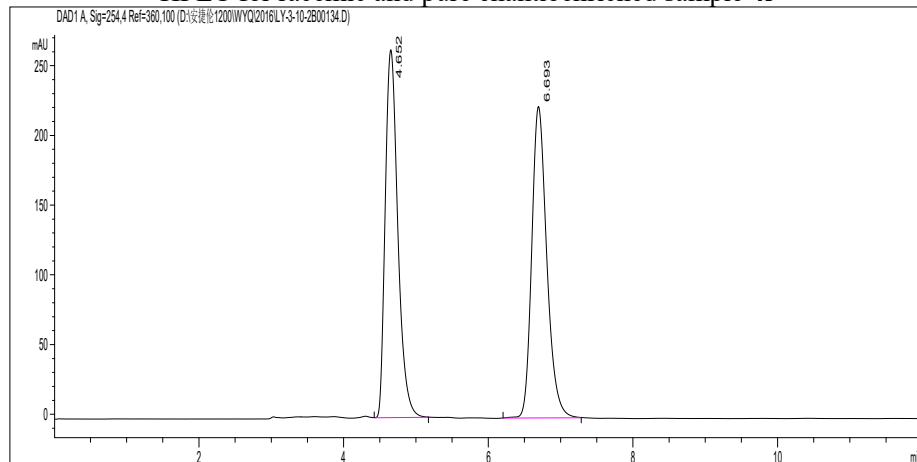

| 编号 | 时间    | 峰面积    | 峰高    | 峰宽     | 对称因子  | 峰面积 %  |
|----|-------|--------|-------|--------|-------|--------|
| 1  | 4.652 | 3191.1 | 263.9 | 0.1891 | 0.725 | 49.666 |
| 2  | 6.693 | 3234   | 223.5 | 0.2208 | 0.756 | 50.334 |

HPLC for racemic and pure enantioenriched sample 4m

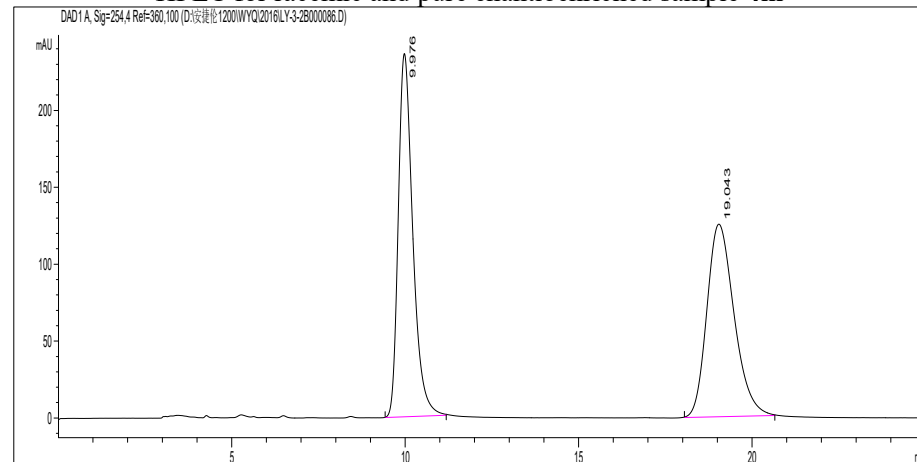

| 编号 | 时间     | 峰面积    | 峰高    | 峰宽     | 对称因子  | 峰面积 %  |
|----|--------|--------|-------|--------|-------|--------|
| 1  | 9.976  | 6868.3 | 236.3 | 0.4432 | 0.674 | 50.097 |
| 2  | 19.043 | 6841.8 | 125.3 | 0.8329 | 0.745 | 49.903 |

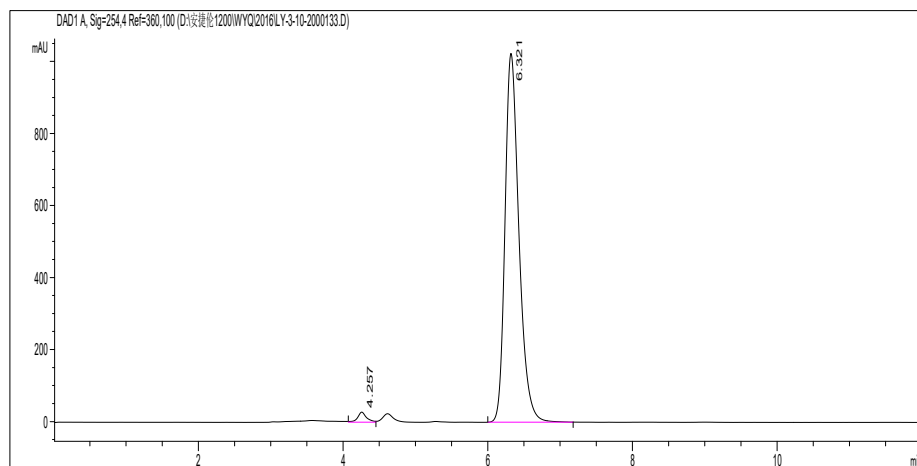

| 编号 | 时间    | 峰面积     | 峰高     | 峰宽     | 对称因子  | 峰面积 %  |
|----|-------|---------|--------|--------|-------|--------|
| 1  | 4.257 | 245.9   | 28.3   | 0.1255 | 0.821 | 1.764  |
| 2  | 6.321 | 13699.1 | 1024.3 | 0.204  | 0.703 | 98.236 |

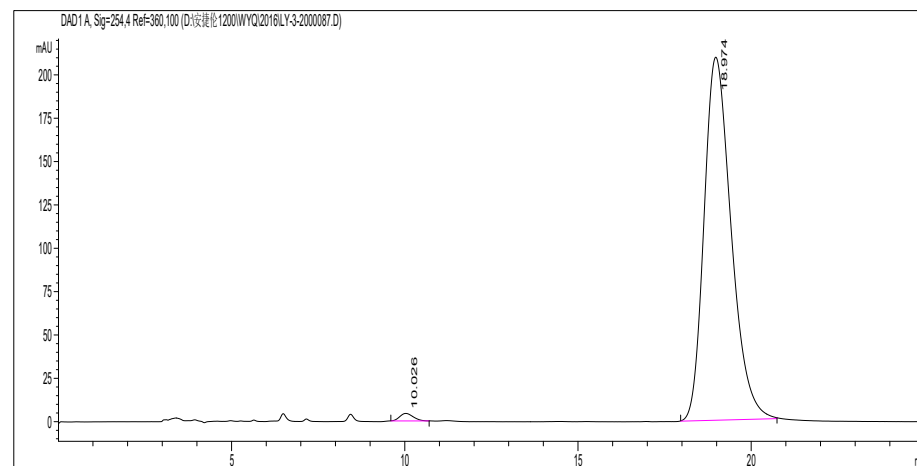

| 编号 | 时间     | 峰面积     | 峰高    | 峰宽     | 对称因子  | 峰面积 %  |
|----|--------|---------|-------|--------|-------|--------|
| 1  | 10.026 | 122.6   | 4.4   | 0.4197 | 0.777 | 1.064  |
| 2  | 18.974 | 11399.2 | 209.6 | 0.8324 | 0.718 | 98.936 |

HPLC for racemic and pure enantioenriched sample 4n

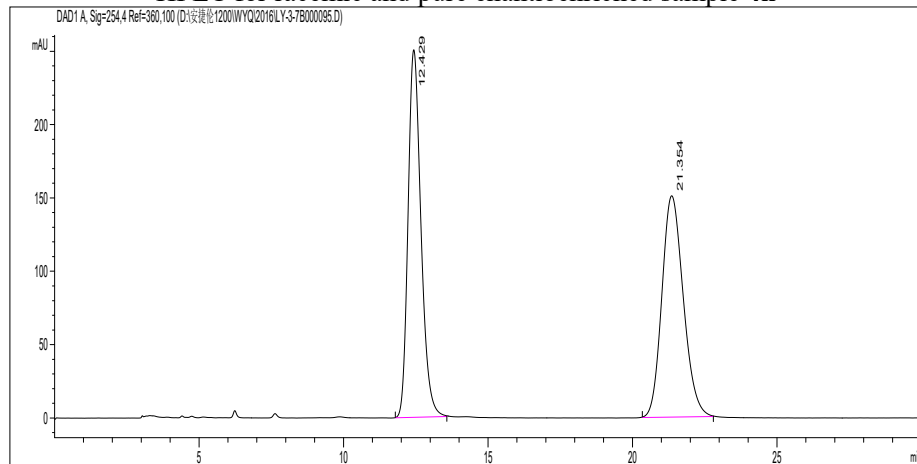

| 编号 | 时间     | 峰面积    | 峰高    | 峰宽     | 对称因子  | 峰面积 %  |
|----|--------|--------|-------|--------|-------|--------|
| 1  | 12.429 | 7769.5 | 250.6 | 0.4777 | 0.749 | 49.951 |
| 2  | 21.354 | 7784.8 | 151   | 0.7936 | 0.806 | 50.049 |

HPLC for racemic and pure enantioenriched sample 4o

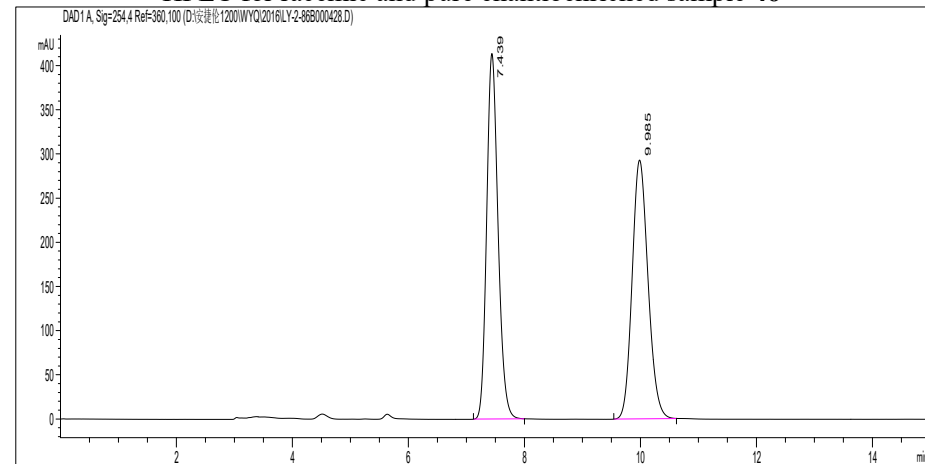

| 编号 | 时间    | 峰面积    | 峰高    | 峰宽    | 对称因子  | 峰面积 %  |
|----|-------|--------|-------|-------|-------|--------|
| 1  | 7.439 | 5643.6 | 414.1 | 0.211 | 0.804 | 50.296 |
| 2  | 9.985 | 5577.1 | 293.1 | 0.294 | 0.834 | 49.704 |

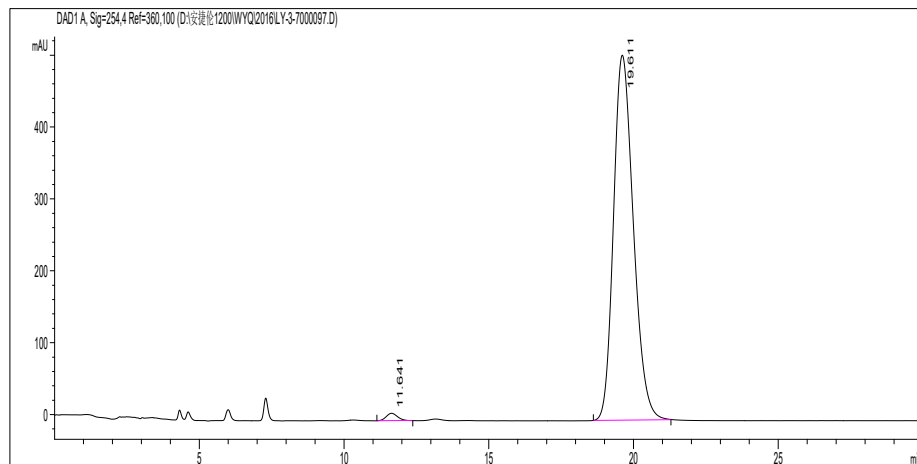

| 编号 | 时间     | 峰面积     | 峰高   | 峰宽     | 对称因子  | 峰面积 %  |
|----|--------|---------|------|--------|-------|--------|
| 1  | 11.641 | 284.6   | 10.4 | 0.4166 | 0.842 | 1.160  |
| 2  | 19.611 | 24249.9 | 508  | 0.7369 | 0.752 | 98.840 |

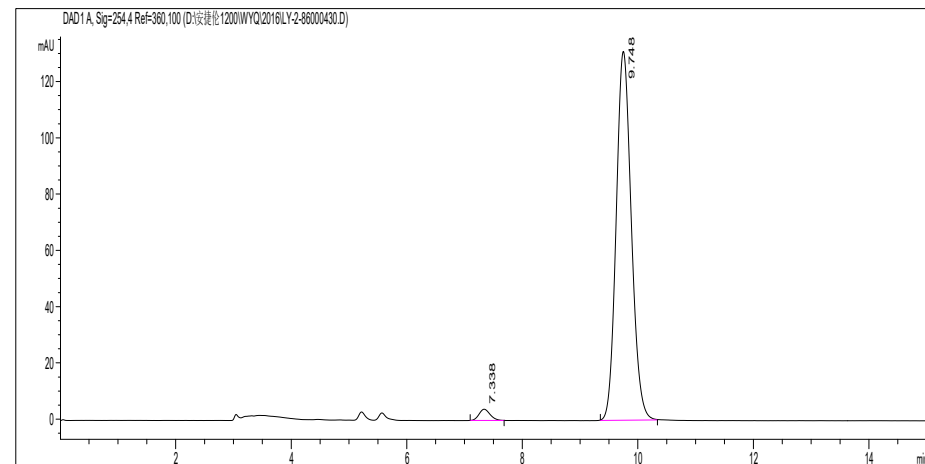

| 编号 | 时间    | 峰面积    | 峰高    | 峰宽     | 对称因子  | 峰面积 %  |
|----|-------|--------|-------|--------|-------|--------|
| 1  | 7.338 | 54     | 4     | 0.2088 | 0.811 | 2.216  |
| 2  | 9.748 | 2383.3 | 131.1 | 0.28   | 0.851 | 97.784 |

HPLC for racemic and pure enantioenriched sample 4p

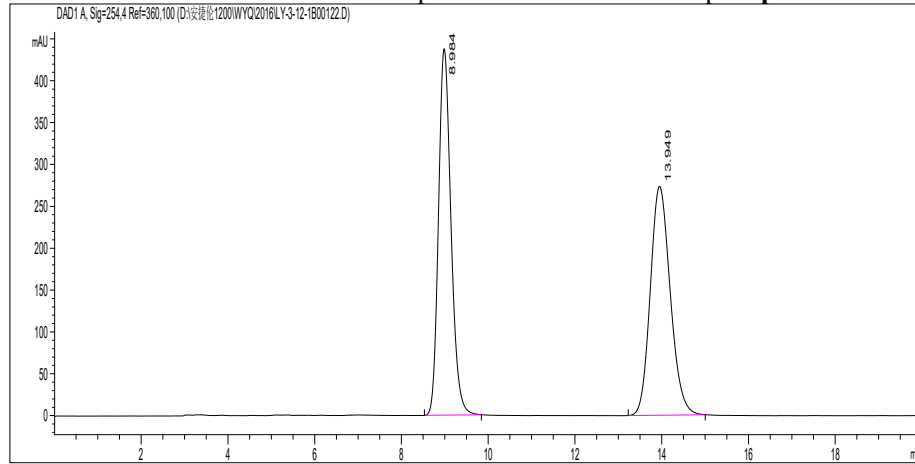

| 编号 | 时间     | 峰面积    | 峰高    | 峰宽     | 对称因子  | 峰面积 %  |
|----|--------|--------|-------|--------|-------|--------|
| 1  | 8.984  | 8752.4 | 437.9 | 0.3072 | 0.786 | 50.025 |
| 2  | 13.949 | 8743.8 | 273.5 | 0.4949 | 0.821 | 49.975 |

HPLC for racemic and pure enantioenriched sample 4q

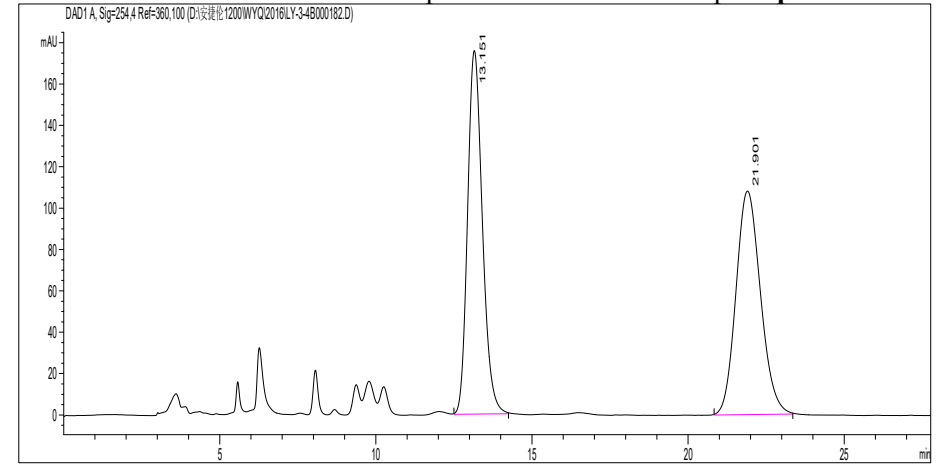

| 编号 | 时间     | 峰面积    | 峰高    | 峰宽     | 对称因子  | 峰面积 %  |
|----|--------|--------|-------|--------|-------|--------|
| 1  | 13.151 | 5794.9 | 175.9 | 0.5085 | 0.788 | 49.551 |
| 2  | 21.901 | 5899.8 | 108.1 | 0.8346 | 0.845 | 50.449 |

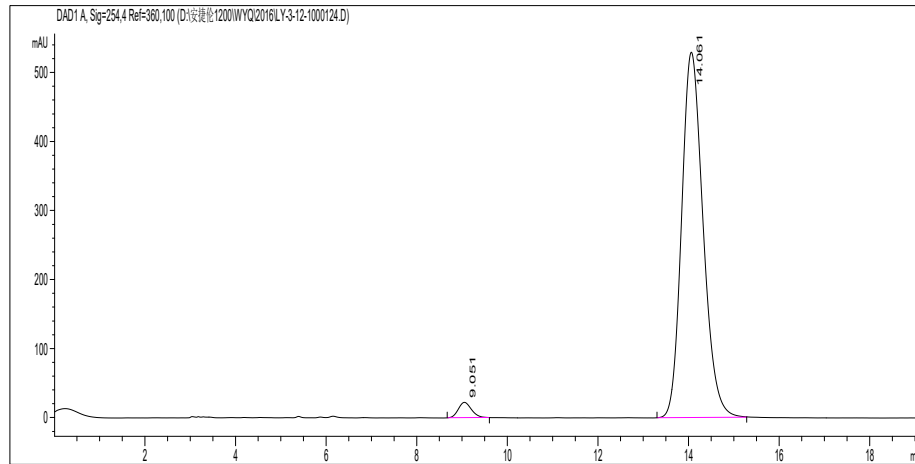

| 编号 | 时间     | 峰面积   | 峰高    | 峰宽     | 对称因子  | 峰面积 %  |
|----|--------|-------|-------|--------|-------|--------|
| 1  | 9.051  | 456.8 | 22.4  | 0.3119 | 0.821 | 2.558  |
| 2  | 14.061 | 17400 | 529.5 | 0.5074 | 0.785 | 97.442 |

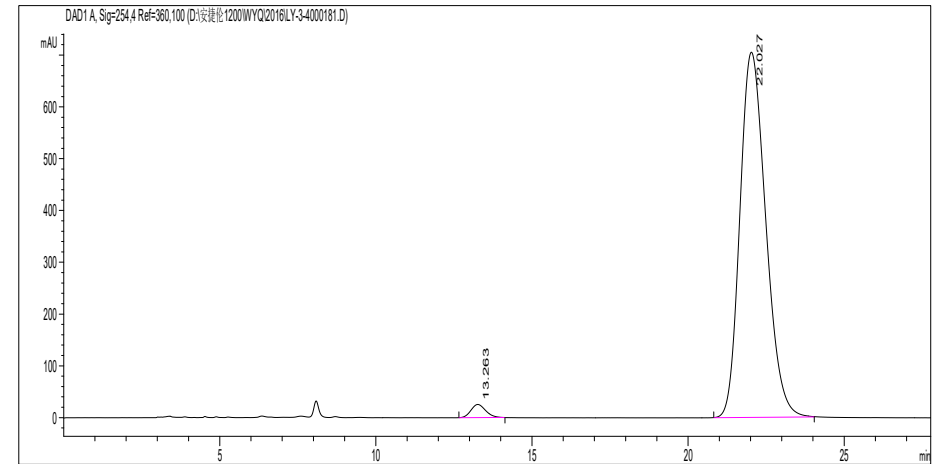

| 编号 | 时间     | 峰面积     | 峰高    | 峰宽     | 对称因子  | 峰面积 %  |
|----|--------|---------|-------|--------|-------|--------|
| 1  | 13.263 | 845.4   | 25.6  | 0.5098 | 0.818 | 2.043  |
| 2  | 22.027 | 40529.9 | 705.3 | 0.8964 | 0.759 | 97.957 |

### HPLC for racemic and pure enantioenriched sample 4r

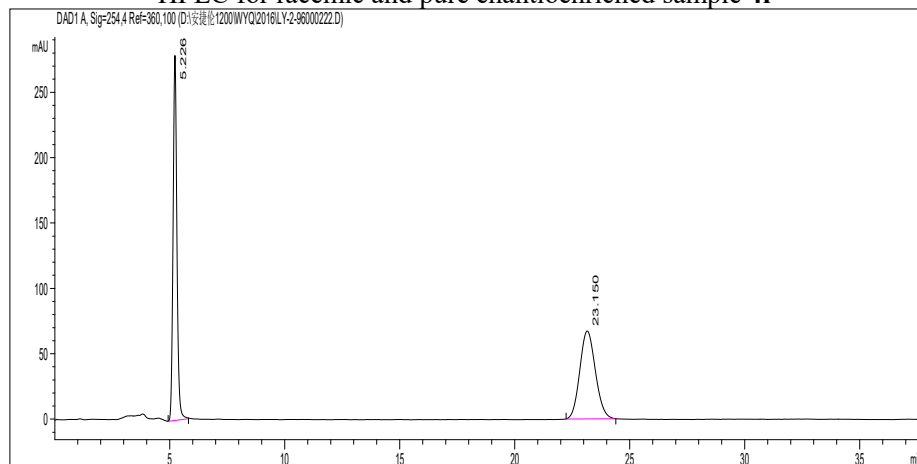

| 编号 | 时间    | 峰面积    | 峰高    | 峰宽     | 对称因子  | 峰面积 %  |
|----|-------|--------|-------|--------|-------|--------|
| 1  | 5.226 | 3234.2 | 279.2 | 0.1731 | 0.89  | 50.392 |
| 2  | 23.15 | 3183.8 | 67.4  | 0.7253 | 0.876 | 49.608 |

### HPLC for racemic and pure enantioenriched sample 4s

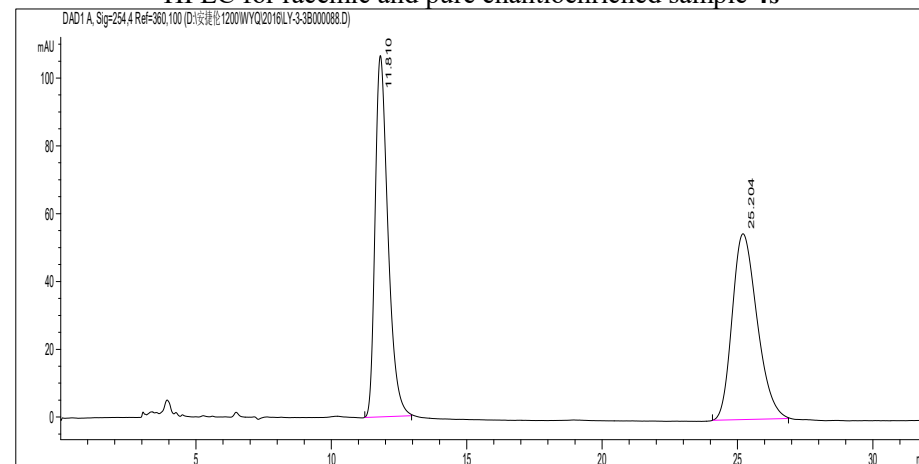

| 编号 | 时间     | 峰面积    | 峰高    | 峰宽     | 对称因子  | 峰面积 %  |
|----|--------|--------|-------|--------|-------|--------|
| 1  | 11.81  | 3518.6 | 106.6 | 0.503  | 0.643 | 50.054 |
| 2  | 25.204 | 3511   | 54.9  | 0.9646 | 0.736 | 49.946 |

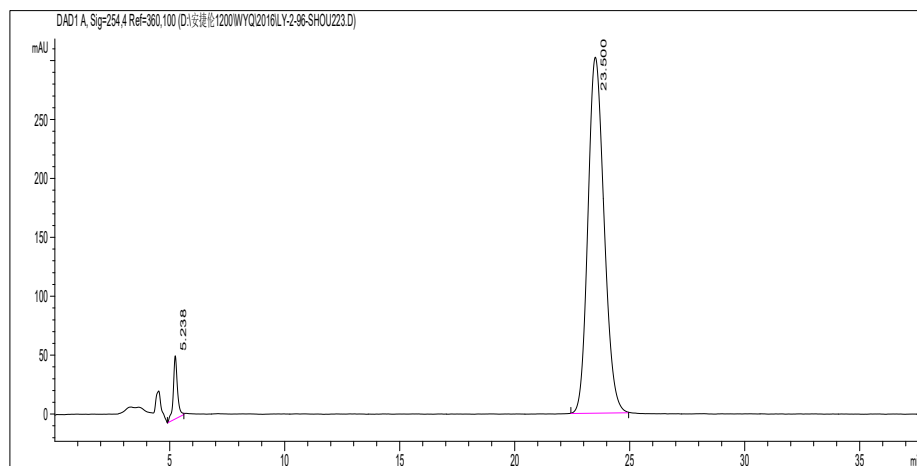

| 编号 | 时间    | 峰面积     | 峰高    | 峰宽     | 对称因子  | 峰面积 %  |
|----|-------|---------|-------|--------|-------|--------|
| 1  | 5.238 | 675.2   | 53.7  | 0.1826 | 0.877 | 4.377  |
| 2  | 23.5  | 14749.9 | 302.2 | 0.7535 | 0.803 | 95.623 |

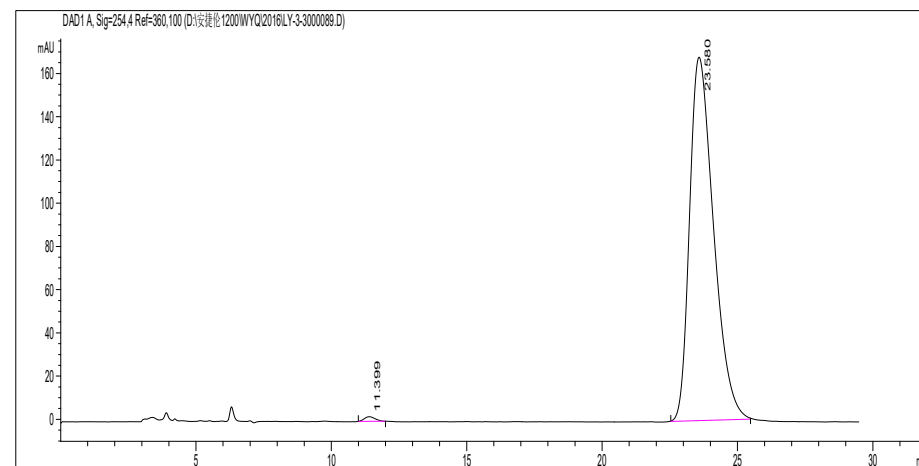

| 编号 | 时间     | 峰面积     | 峰高    | 峰宽     | 对称因子  | 峰面积 %  |
|----|--------|---------|-------|--------|-------|--------|
| 1  | 11.399 | 61.3    | 2.2   | 0.3892 | 0.789 | 0.589  |
| 2  | 23.58  | 10353.7 | 168.2 | 0.9302 | 0.62  | 99.411 |



HPLC for racemic and pure enantioenriched sample **4t**

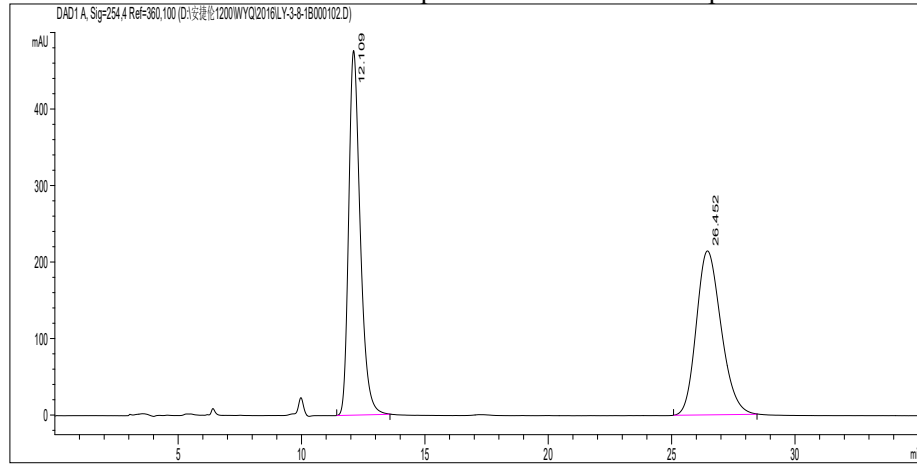

| 编号 | 时间     | 峰面积     | 峰高    | 峰宽     | 对称因子  | 峰面积 %  |
|----|--------|---------|-------|--------|-------|--------|
| 1  | 12.109 | 15512.1 | 476.7 | 0.4937 | 0.695 | 50.869 |
| 2  | 26.452 | 14982.2 | 214.5 | 1.071  | 0.782 | 49.131 |

HPLC for racemic and pure enantioenriched sample **4u**

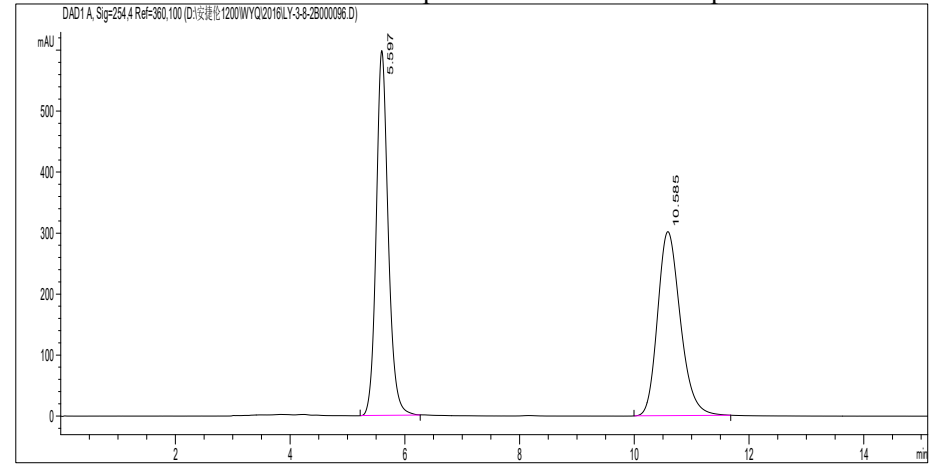

| 编号 | 时间     | 峰面积    | 峰高    | 峰宽     | 对称因子  | 峰面积 %  |
|----|--------|--------|-------|--------|-------|--------|
| 1  | 5.597  | 8692.7 | 598.7 | 0.2194 | 0.819 | 51.033 |
| 2  | 10.585 | 8341   | 302.2 | 0.4261 | 0.773 | 48.967 |

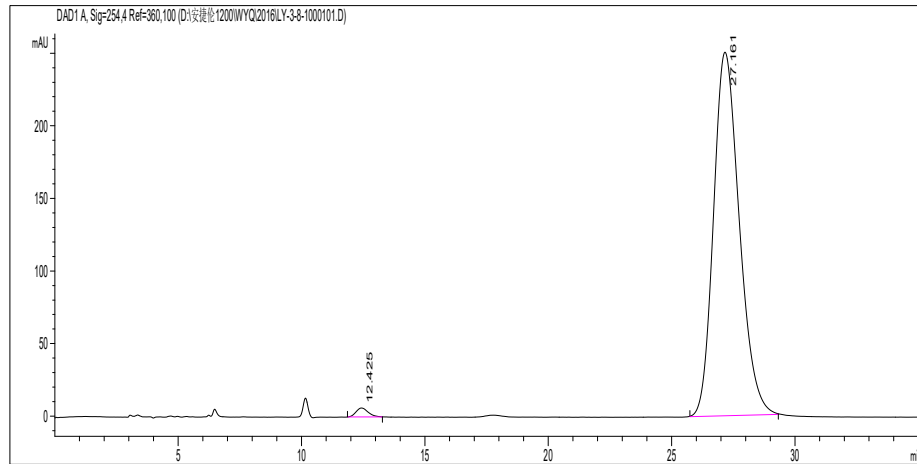

| 编号 | 时间     | 峰面积     | 峰高    | 峰宽     | 对称因子  | 峰面积 %  |
|----|--------|---------|-------|--------|-------|--------|
| 1  | 12.425 | 215.1   | 6.2   | 0.5223 | 0.765 | 1.169  |
| 2  | 27.161 | 18190.6 | 250.5 | 1.1111 | 0.761 | 98.831 |

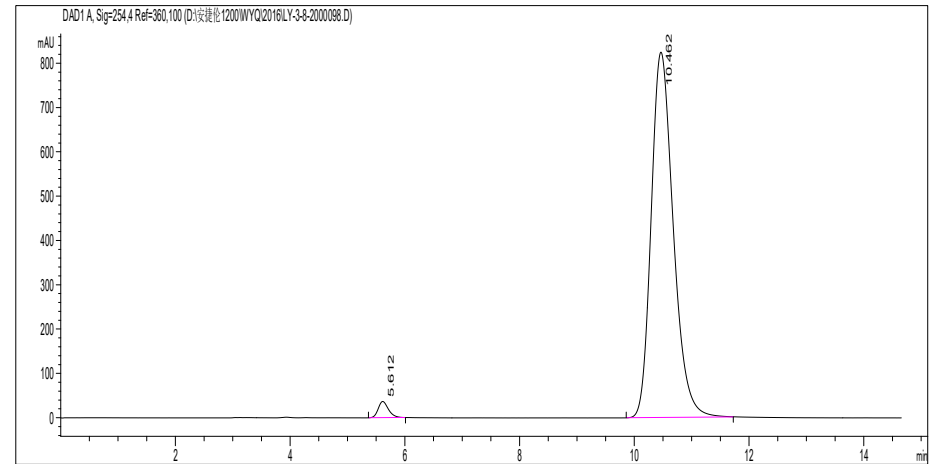

| 编号 | 时间     | 峰面积     | 峰高    | 峰宽     | 对称因子  | 峰面积 %  |
|----|--------|---------|-------|--------|-------|--------|
| 1  | 5.612  | 460.3   | 36.7  | 0.1922 | 0.742 | 2.046  |
| 2  | 10.462 | 22035.5 | 824.6 | 0.4118 | 0.744 | 97.954 |

HPLC for racemic and pure enantioenriched sample 4v

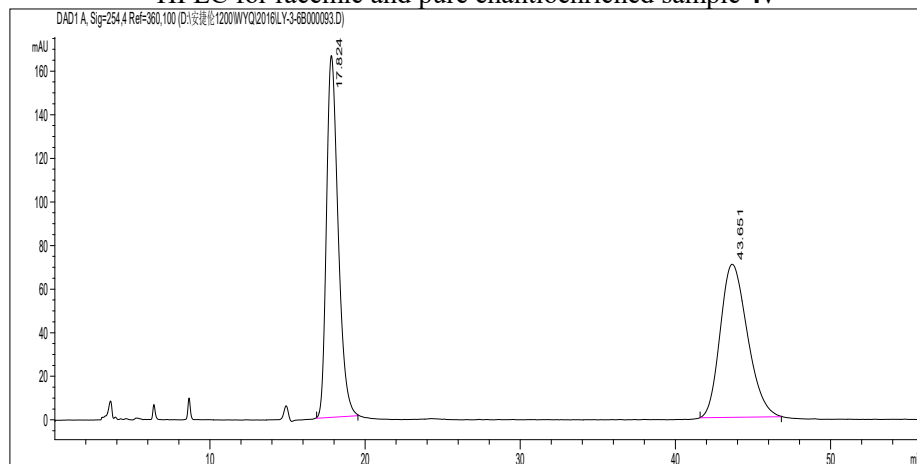

| 编号 | 时间     | 峰面积    | 峰高   | 峰宽     | 对称因子  | 峰面积 %  |
|----|--------|--------|------|--------|-------|--------|
| 1  | 17.824 | 8692.6 | 166  | 0.7988 | 0.68  | 50.310 |
| 2  | 43.651 | 8585.6 | 70.3 | 1.5992 | 0.726 | 49.690 |

HPLC for racemic and pure enantioenriched sample 4w

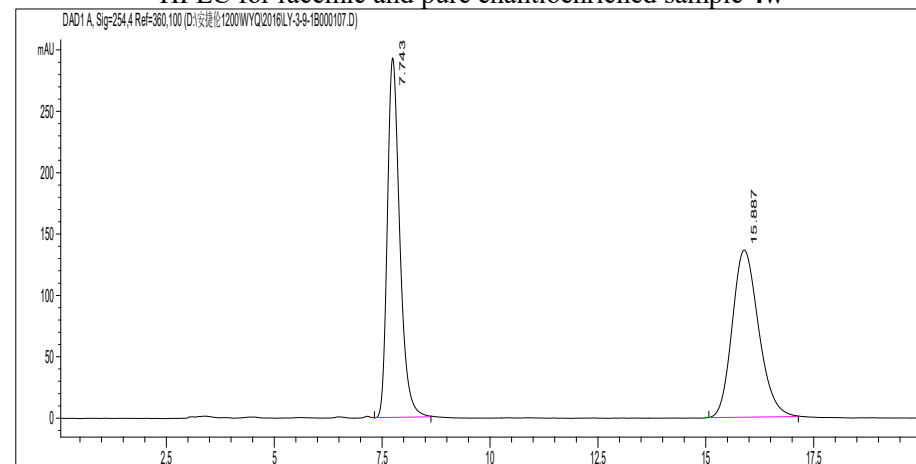

| 编号 | 时间     | 峰面积    | 峰高    | 峰宽     | 对称因子  | 峰面积 %  |
|----|--------|--------|-------|--------|-------|--------|
| 1  | 7.743  | 5853.5 | 293   | 0.305  | 0.699 | 50.193 |
| 2  | 15.887 | 5808.4 | 136.4 | 0.6589 | 0.791 | 49.807 |

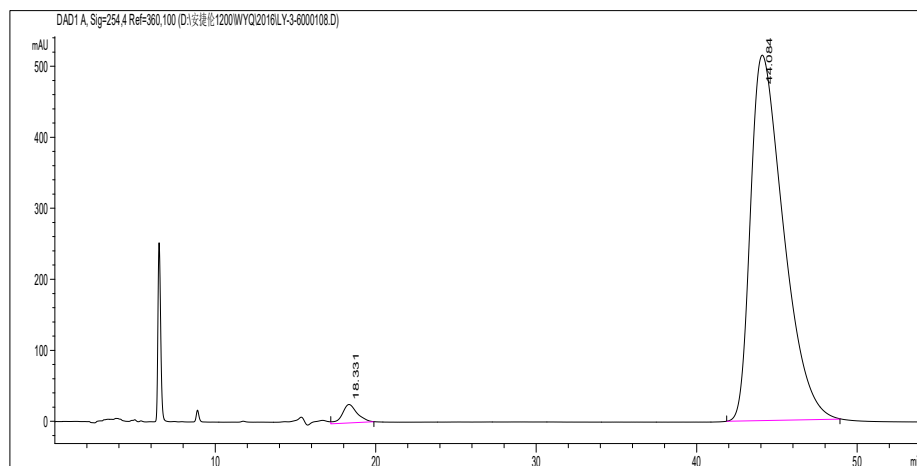

| 编号 | 时间     | 峰面积     | 峰高    | 峰宽     | 对称因子  | 峰面积 %  |
|----|--------|---------|-------|--------|-------|--------|
| 1  | 18.331 | 1715.6  | 26.2  | 0.9552 | 0.812 | 2.280  |
| 2  | 44.084 | 73526.2 | 514.8 | 2.0824 | 0.525 | 97.720 |

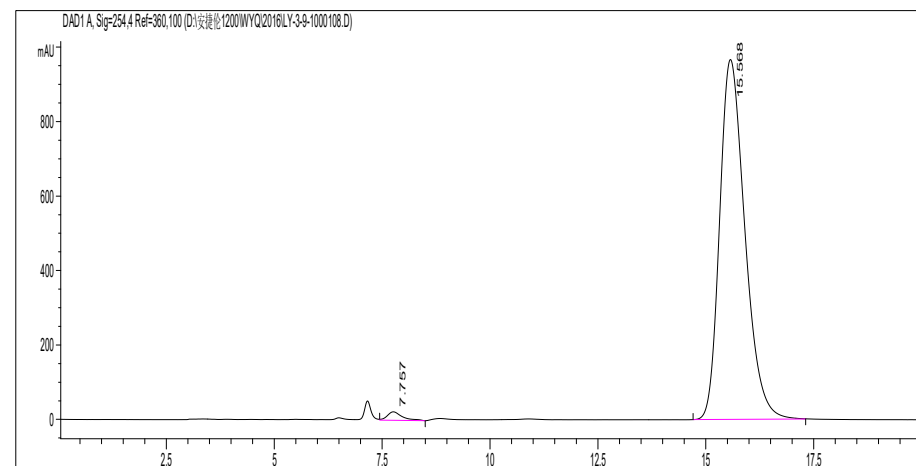

| 编号 | 时间     | 峰面积     | 峰高    | 峰宽     | 对称因子  | 峰面积 %  |
|----|--------|---------|-------|--------|-------|--------|
| 1  | 7.757  | 555.2   | 22.9  | 0.3548 | 0.619 | 1.392  |
| 2  | 15.568 | 39323.5 | 967.1 | 0.6264 | 0.702 | 98.608 |

HPLC for racemic and pure enantioenriched sample 4x

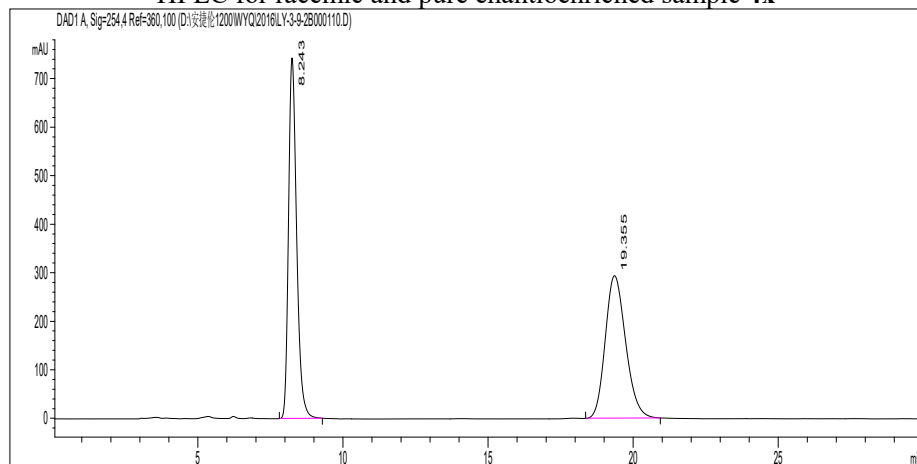

| 编号 | 时间     | 峰面积     | 峰高    | 峰宽     | 对称因子  | 峰面积 %  |
|----|--------|---------|-------|--------|-------|--------|
| 1  | 8.243  | 14458.3 | 743.2 | 0.299  | 0.716 | 50.193 |
| 2  | 19.355 | 14347.2 | 293.7 | 0.7558 | 0.793 | 49.807 |

HPLC for racemic and pure enantioenriched sample 4y

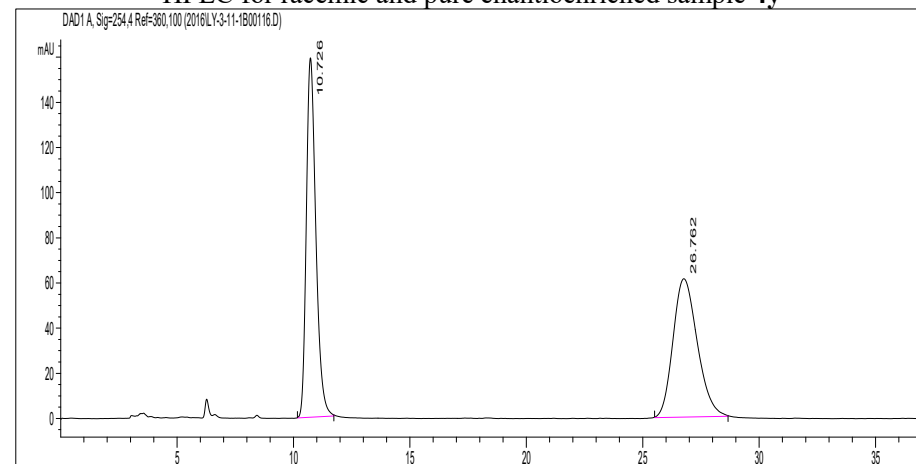

| 编号 | 时间     | 峰面积    | 峰高    | 峰宽     | 对称因子  | 峰面积 %  |
|----|--------|--------|-------|--------|-------|--------|
| 1  | 10.726 | 4526.5 | 159.2 | 0.4357 | 0.708 | 50.418 |
| 2  | 26.762 | 4451.4 | 61.3  | 1.0848 | 0.768 | 49.582 |

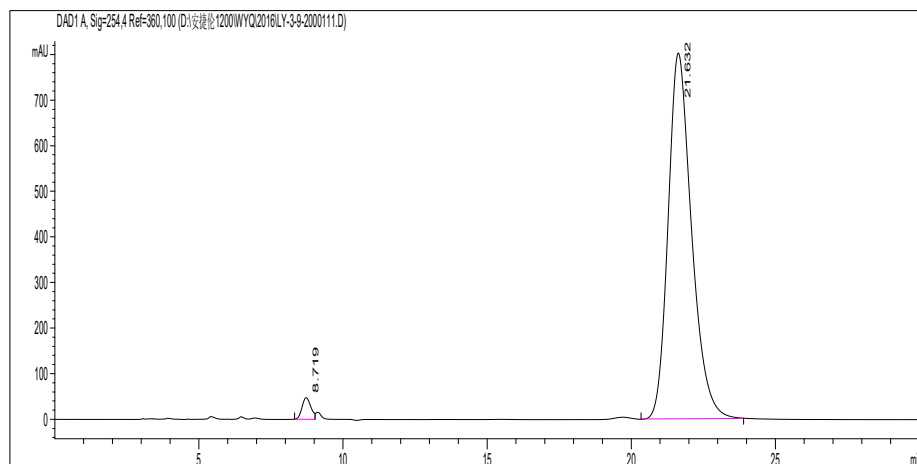

| 编号 | 时间     | 峰面积     | 峰高    | 峰宽     | 对称因子  | 峰面积 %  |
|----|--------|---------|-------|--------|-------|--------|
| 1  | 8.719  | 1018    | 47.6  | 0.3295 | 0.844 | 2.191  |
| 2  | 21.632 | 45441.3 | 802.6 | 0.8505 | 0.729 | 97.809 |

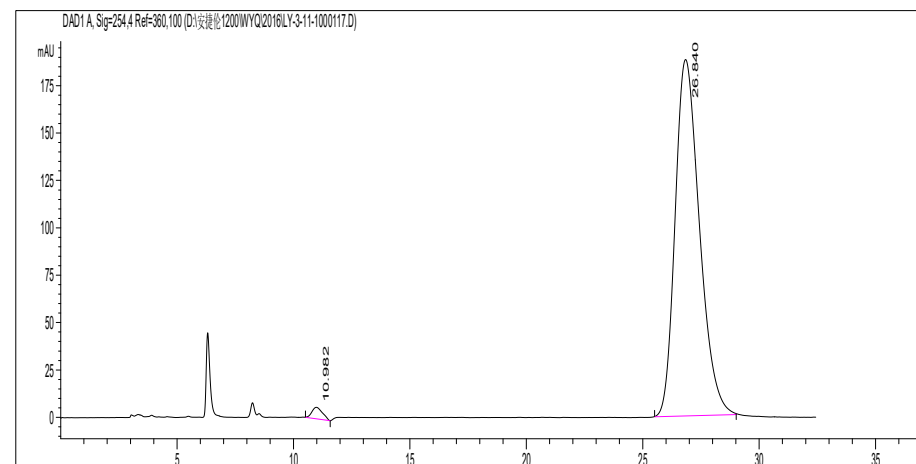

| 编号 | 时间     | 峰面积     | 峰高    | 峰宽     | 对称因子  | 峰面积 %  |
|----|--------|---------|-------|--------|-------|--------|
| 1  | 10.982 | 192.5   | 6.1   | 0.467  | 0.704 | 1.389  |
| 2  | 26.84  | 13672.7 | 188.2 | 1.1137 | 0.712 | 98.611 |

HPLC for racemic and pure enantioenriched sample 4z

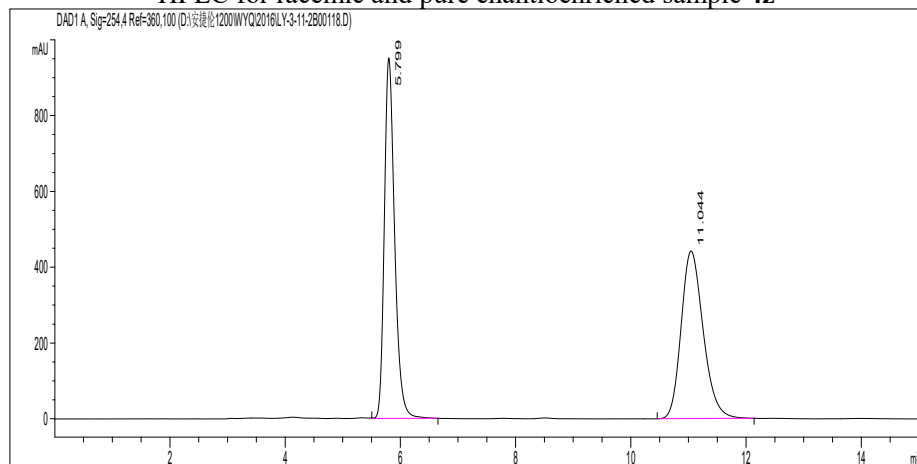

| 编号 | 时间     | 峰面积     | 峰高    | 峰宽     | 对称因子  | 峰面积 %  |
|----|--------|---------|-------|--------|-------|--------|
| 1  | 5.799  | 11817.1 | 951.7 | 0.1909 | 0.719 | 50.112 |
| 2  | 11.044 | 11764.3 | 442.4 | 0.4083 | 0.771 | 49.888 |

HPLC for racemic and pure enantioenriched sample 6a

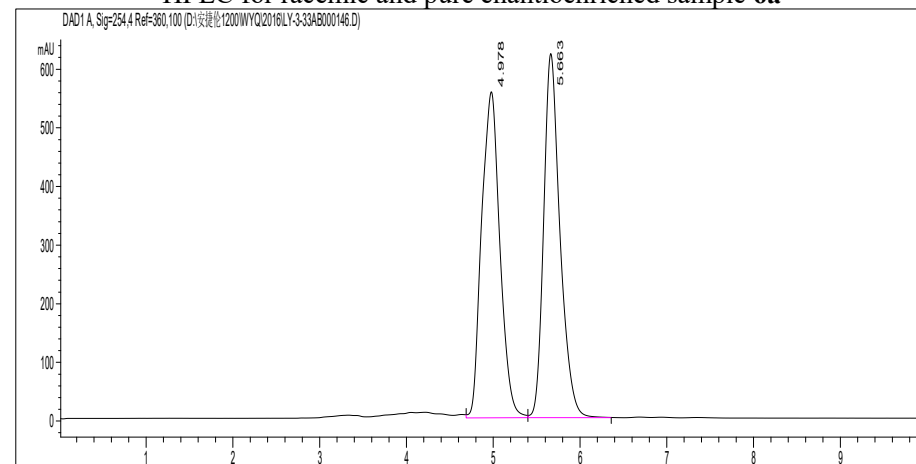

| 编号 | 时间    | 峰面积    | 峰高    | 峰宽     | 对称因子  | 峰面积 %  |
|----|-------|--------|-------|--------|-------|--------|
| 1  | 4.978 | 8157.4 | 556.4 | 0.235  | 1.042 | 50.097 |
| 2  | 5.663 | 8125.9 | 621.4 | 0.1946 | 0.717 | 49.903 |

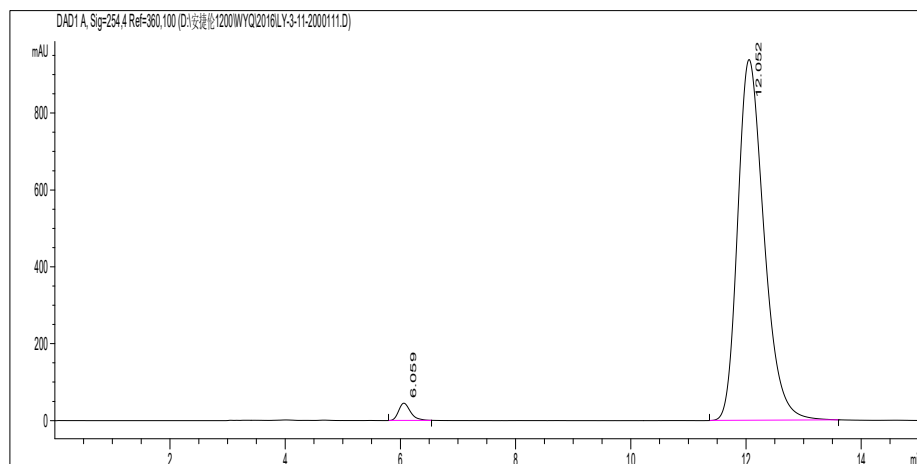

| 编号 | 时间     | 峰面积     | 峰高    | 峰宽     | 对称因子  | 峰面积 %  |
|----|--------|---------|-------|--------|-------|--------|
| 1  | 6.059  | 650     | 45.1  | 0.2201 | 0.73  | 2.136  |
| 2  | 12.052 | 29772.5 | 938.8 | 0.488  | 0.714 | 97.864 |

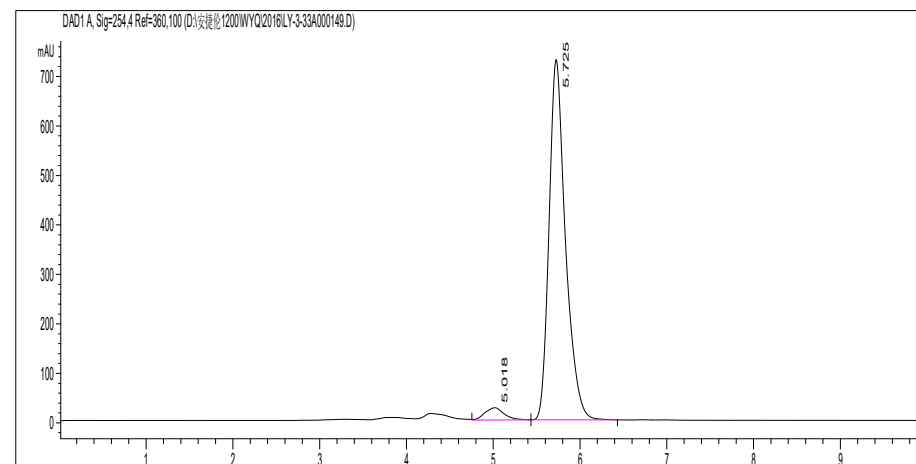

| 编号 | 时间    | 峰面积    | 峰高    | 峰宽     | 对称因子  | 峰面积 %  |
|----|-------|--------|-------|--------|-------|--------|
| 1  | 5.018 | 394.1  | 25.1  | 0.2471 | 0.965 | 3.945  |
| 2  | 5.725 | 9596.2 | 728.6 | 0.1937 | 0.706 | 96.055 |

HPLC for racemic and pure enantioenriched sample **6b**

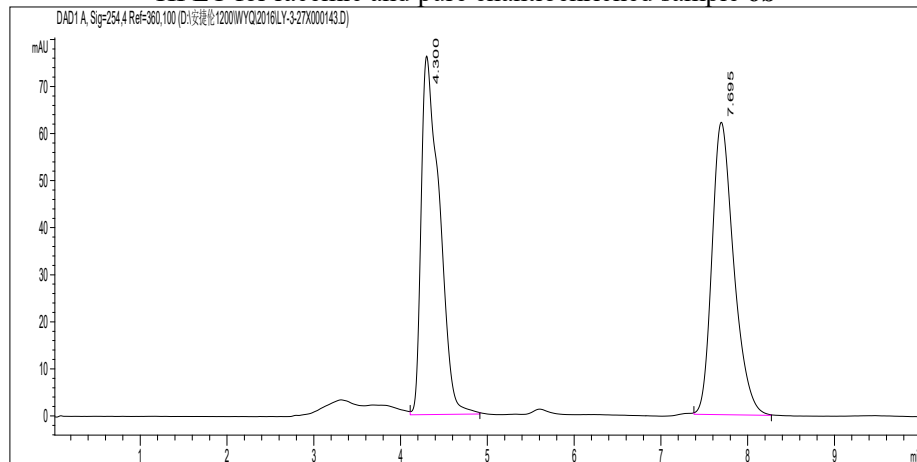

| 编号 | 时间    | 峰面积    | 峰高   | 峰宽     | 对称因子  | 峰面积 %  |
|----|-------|--------|------|--------|-------|--------|
| 1  | 4.3   | 1119.3 | 76.3 | 0.2032 | 0.407 | 50.757 |
| 2  | 7.695 | 1085.9 | 62.2 | 0.2638 | 0.701 | 49.243 |

HPLC for racemic and pure enantioenriched sample **6c**

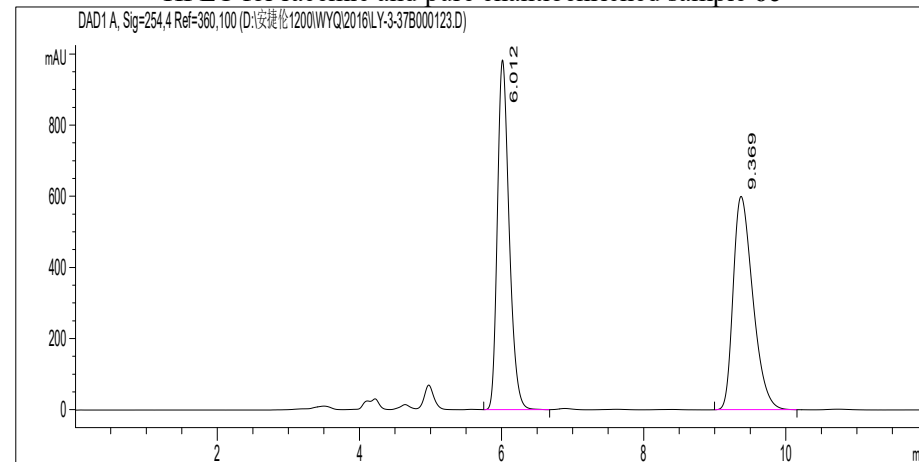

| 编号 | 时间    | 峰面积     | 峰高    | 峰宽     | 对称因子  | 峰面积 %  |
|----|-------|---------|-------|--------|-------|--------|
| 1  | 6.012 | 11331.3 | 984.1 | 0.1763 | 0.72  | 49.537 |
| 2  | 9.369 | 11543   | 600.2 | 0.2964 | 0.633 | 50.463 |

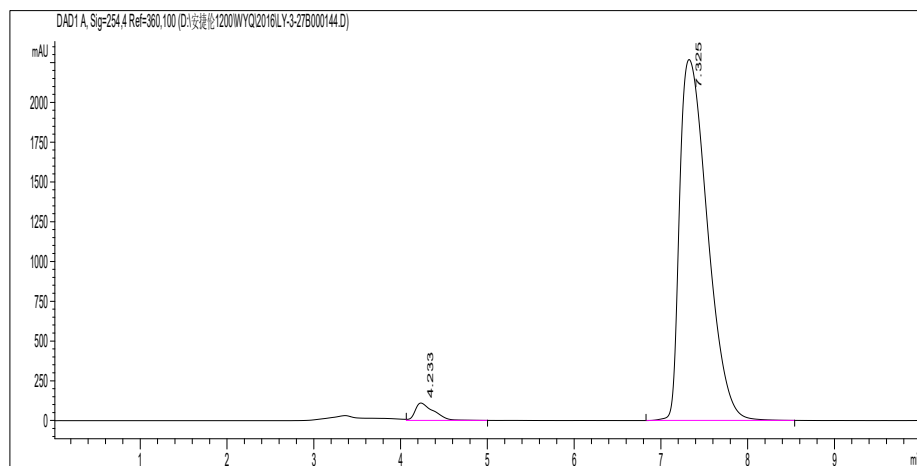

| 编号 | 时间    | 峰面积     | 峰高     | 峰宽     | 对称因子  | 峰面积 %  |
|----|-------|---------|--------|--------|-------|--------|
| 1  | 4.233 | 1655.3  | 109.9  | 0.2138 | 0.42  | 3.173  |
| 2  | 7.325 | 50507.5 | 2269.5 | 0.3516 | 0.485 | 96.827 |

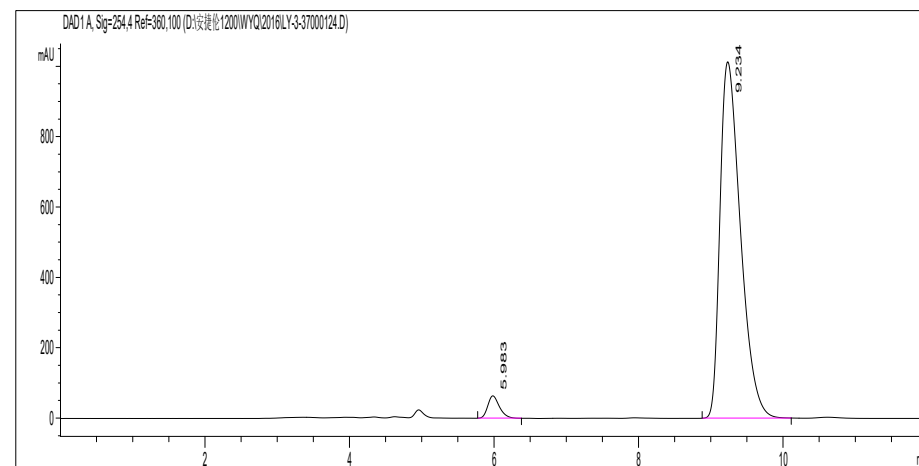

| 编号 | 时间    | 峰面积     | 峰高     | 峰宽     | 对称因子  | 峰面积 %  |
|----|-------|---------|--------|--------|-------|--------|
| 1  | 5.983 | 715.3   | 63.8   | 0.1708 | 0.717 | 3.458  |
| 2  | 9.234 | 19970.7 | 1013.6 | 0.3039 | 0.569 | 96.542 |

HPLC for racemic and pure enantioenriched sample 7

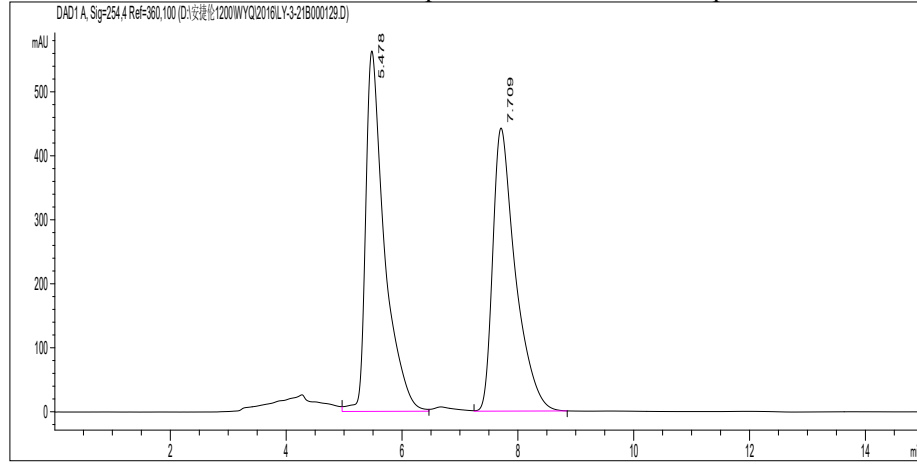

| 编号 | 时间    | 峰面积     | 峰高    | 峰宽     | 对称因子  | 峰面积 %  |
|----|-------|---------|-------|--------|-------|--------|
| 1  | 5.478 | 12698.5 | 563.5 | 0.3229 | 0.466 | 51.321 |
| 2  | 7.709 | 12044.9 | 442.4 | 0.3976 | 0.531 | 48.679 |

HPLC for racemic and pure enantioenriched sample 8

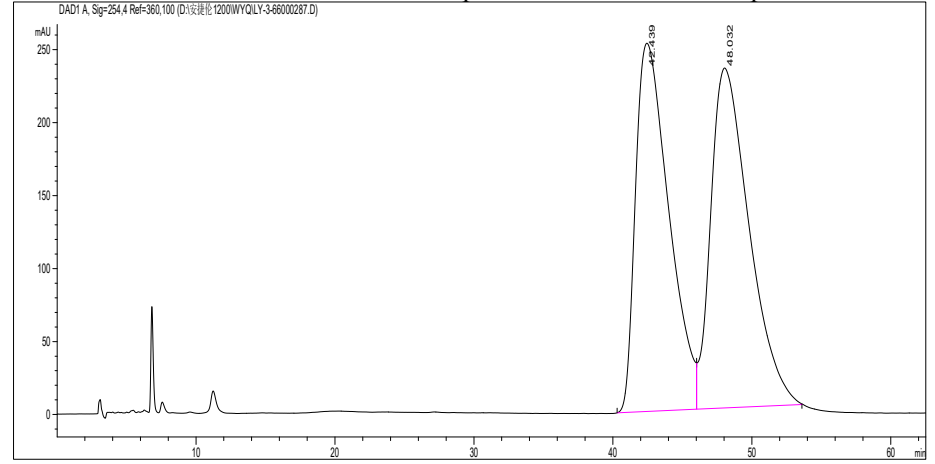

| 编号 | 时间     | 峰面积     | 峰高    | 峰宽     | 对称因子  | 峰面积 %  |
|----|--------|---------|-------|--------|-------|--------|
| 1  | 42.439 | 42073.1 | 252.4 | 2.3308 | 0.487 | 48.415 |
| 2  | 48.032 | 44827.9 | 233   | 2.6065 | 0.533 | 51.585 |

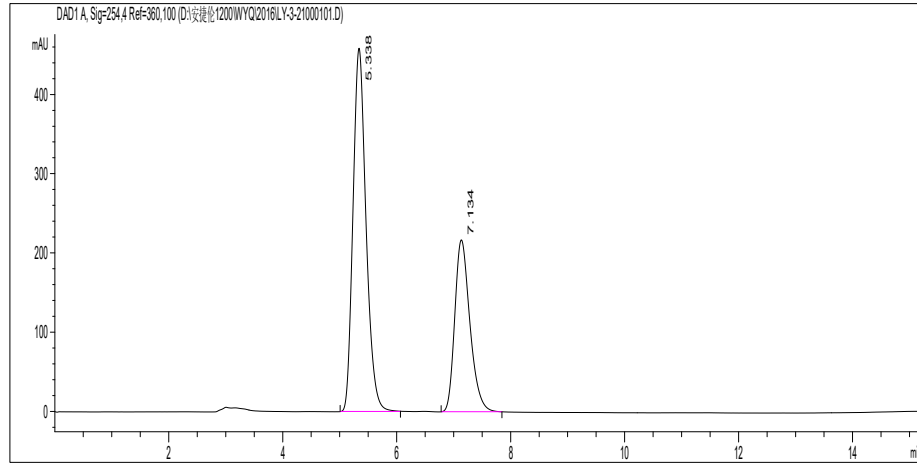

| 编号 | 时间    | 峰面积    | 峰高    | 峰宽     | 对称因子  | 峰面积 %  |
|----|-------|--------|-------|--------|-------|--------|
| 1  | 5.338 | 7285.7 | 458.6 | 0.2434 | 0.803 | 64.555 |
| 2  | 7.134 | 4000.4 | 217.1 | 0.281  | 0.718 | 35.445 |

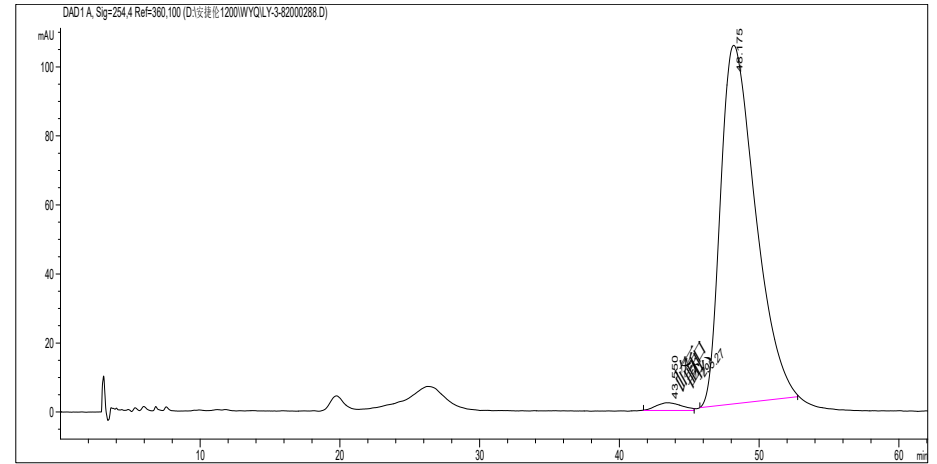

| 编号 | 时间     | 峰面积     | 峰高    | 峰宽     | 对称因子  | 峰面积 %  |
|----|--------|---------|-------|--------|-------|--------|
| 1  | 43.55  | 295.3   | 2.3   | 2.1621 | 0.944 | 1.611  |
| 2  | 48.175 | 18035.9 | 103.9 | 2.2031 | 0.552 | 98.389 |

### HPLC for racemic and pure enantioenriched sample 9

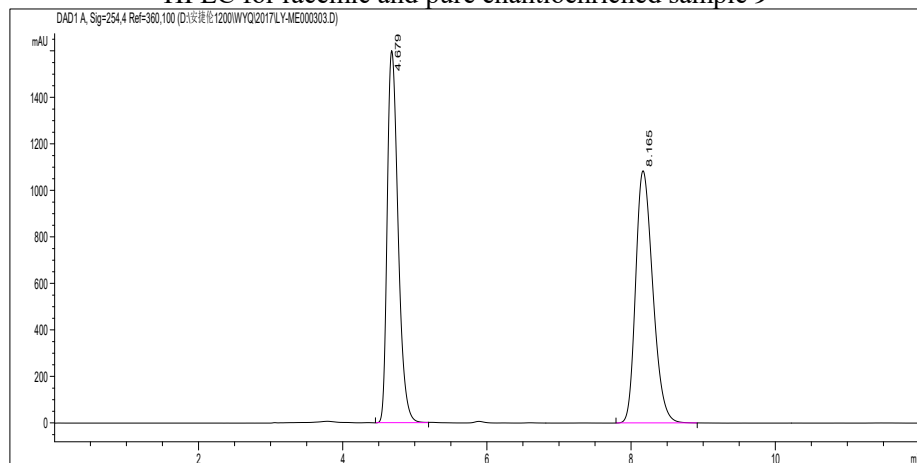

| 编号 | 时间    | 峰面积     | 峰高     | 峰宽     | 对称因子  | 峰面积 %  |
|----|-------|---------|--------|--------|-------|--------|
| 1  | 4.679 | 16730.5 | 1601.1 | 0.1639 | 0.656 | 48.283 |
| 2  | 8.165 | 17920.6 | 1085.1 | 0.2567 | 0.718 | 51.717 |

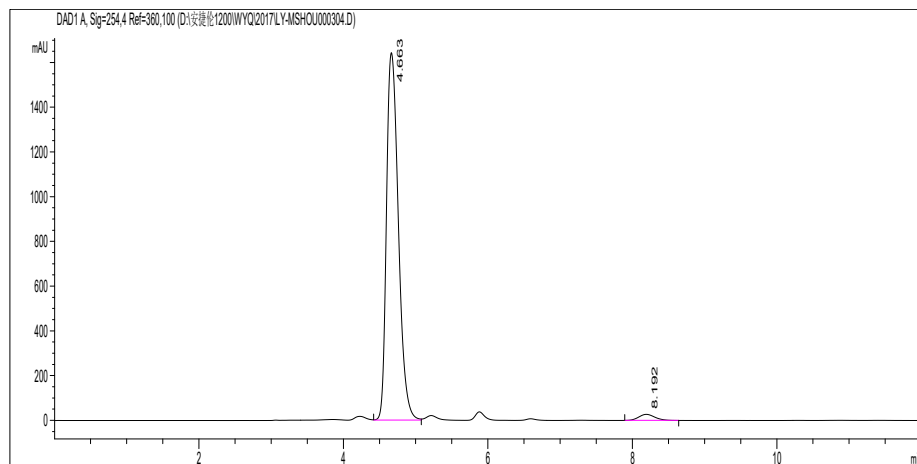

| 编号 | 时间    | 峰面积   | 峰高     | 峰宽     | 对称因子  | 峰面积 %  |
|----|-------|-------|--------|--------|-------|--------|
| 1  | 4.663 | 18776 | 1643.9 | 0.1813 | 0.656 | 97.775 |
| 2  | 8.192 | 427.2 | 27.3   | 0.2427 | 0.839 | 2.225  |

**LY-2-67:** HRMS (ESI)  $m/z$  calcd for  $C_{31}H_{37}N_2O_4^+$  (M+H)<sup>+</sup> 501.27478, found 501.27487.

00153 #6 RT: 0.09 AV: 1 NL: 4.80E6  
T: FTMS + p ESI Full ms [150.00-2000.00]

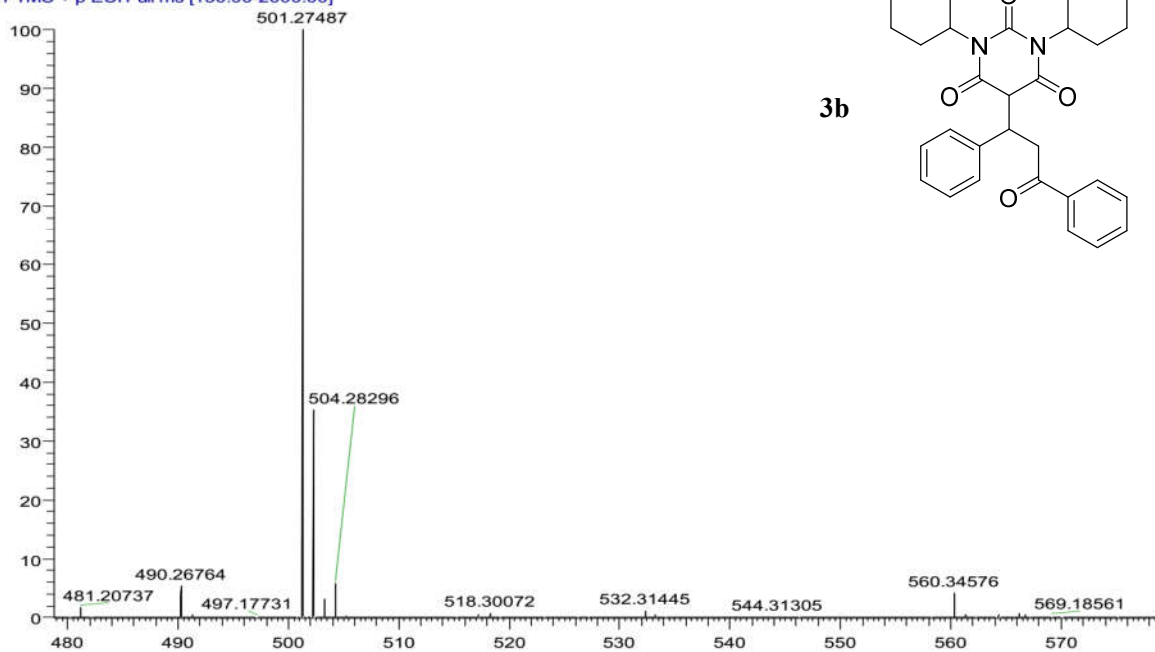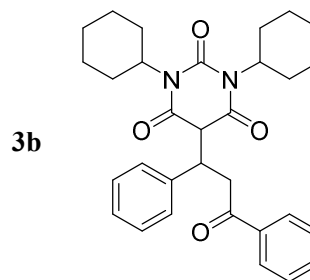

**LY-2-75:** HRMS (ESI)  $m/z$  calcd for  $C_{27}H_{33}N_2O_4^+$  (M+H)<sup>+</sup> 449.24348, found 449.24338.

00155 #13 RT: 0.21 AV: 1 NL: 8.75E7  
T: FTMS + p ESI Full ms [150.00-2000.00]

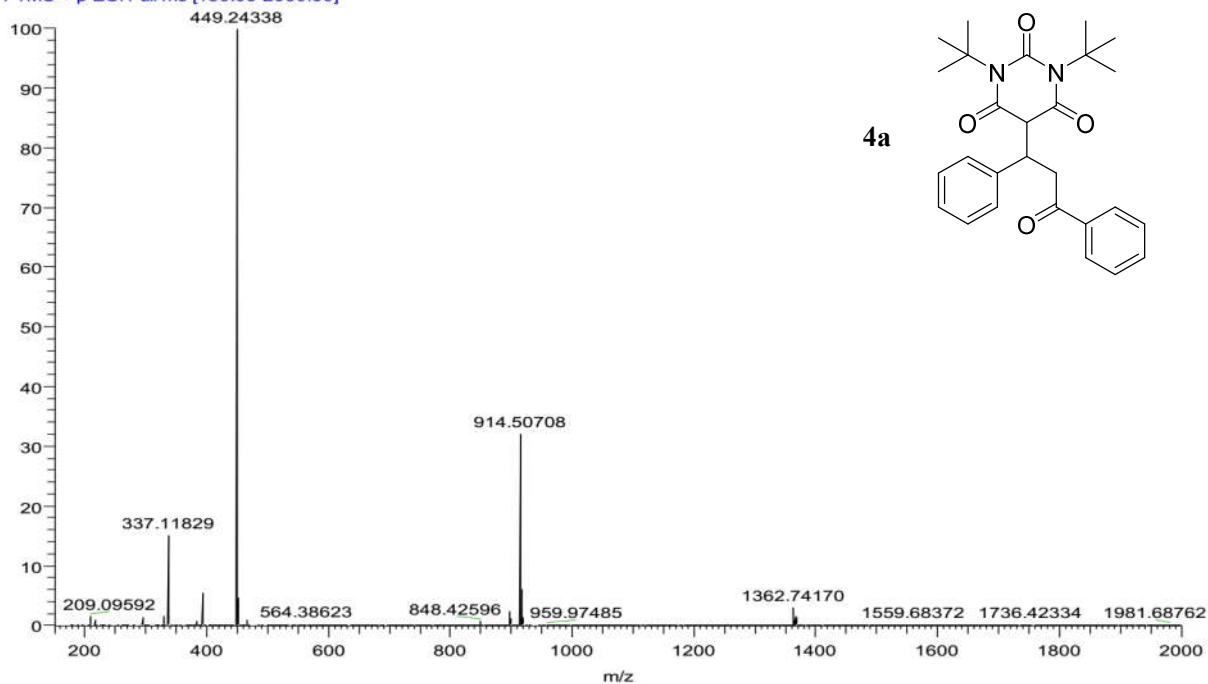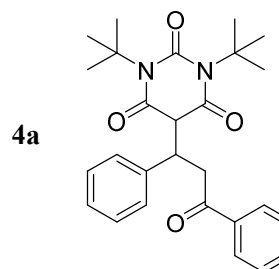



**LY-3-5: HRMS (ESI) m/z calcd for C<sub>28</sub>H<sub>35</sub>N<sub>2</sub>O<sub>4</sub><sup>+</sup> (M+H)<sup>+</sup> 463.25913, found 463.25897.**

00159 #5 RT: 0.07 AV: 1 NL: 4.81E7  
T: FTMS + p ESI Full ms [150.00-2000.00]

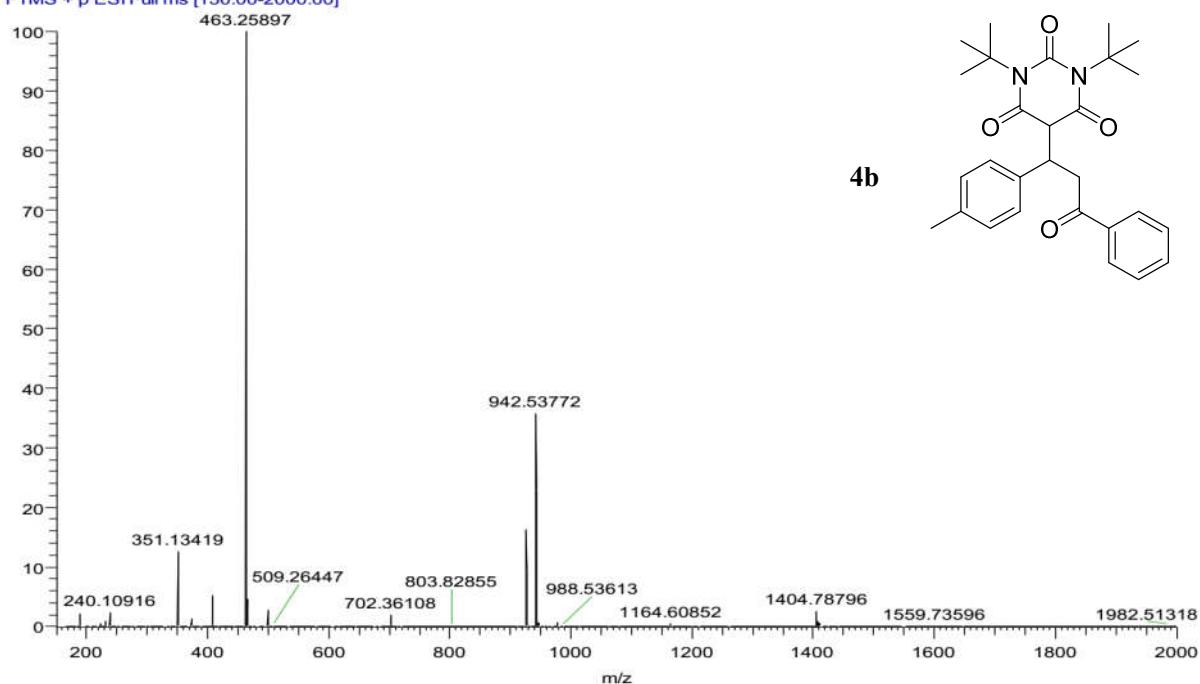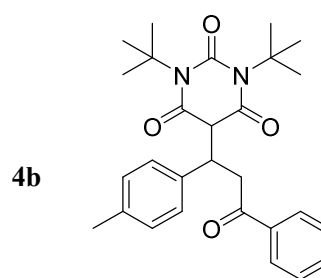

**LY-2-94 HRMS (ESI): m/z calcd for C<sub>28</sub>H<sub>35</sub>N<sub>2</sub>O<sub>5</sub><sup>+</sup> (M+H)<sup>+</sup> 479.25405, found: 479.25406**

00136 #11 RT: 0.16 AV: 1 NL: 1.01E7  
T: FTMS + p ESI Full ms [150.00-2000.00]

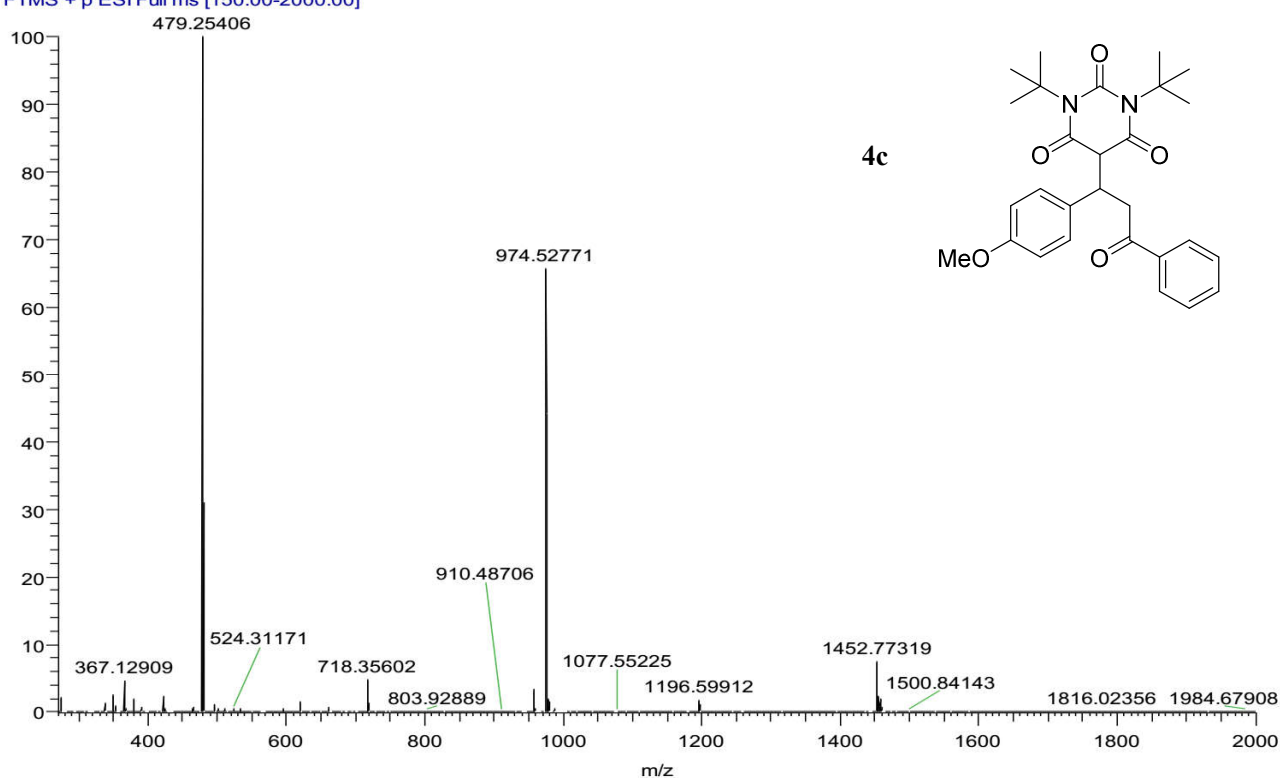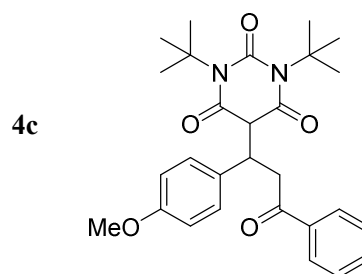

**LY-2-93:** HRMS (ESI)  $m/z$  calcd for  $C_{29}H_{37}N_2O_6^+$  (M+H)<sup>+</sup> 509.26461, found

509.26456.

00156 #9 RT: 0.14 AV: 1 NL: 8.70E7  
T: FTMS + p ESI Full ms [150.00-2000.00]

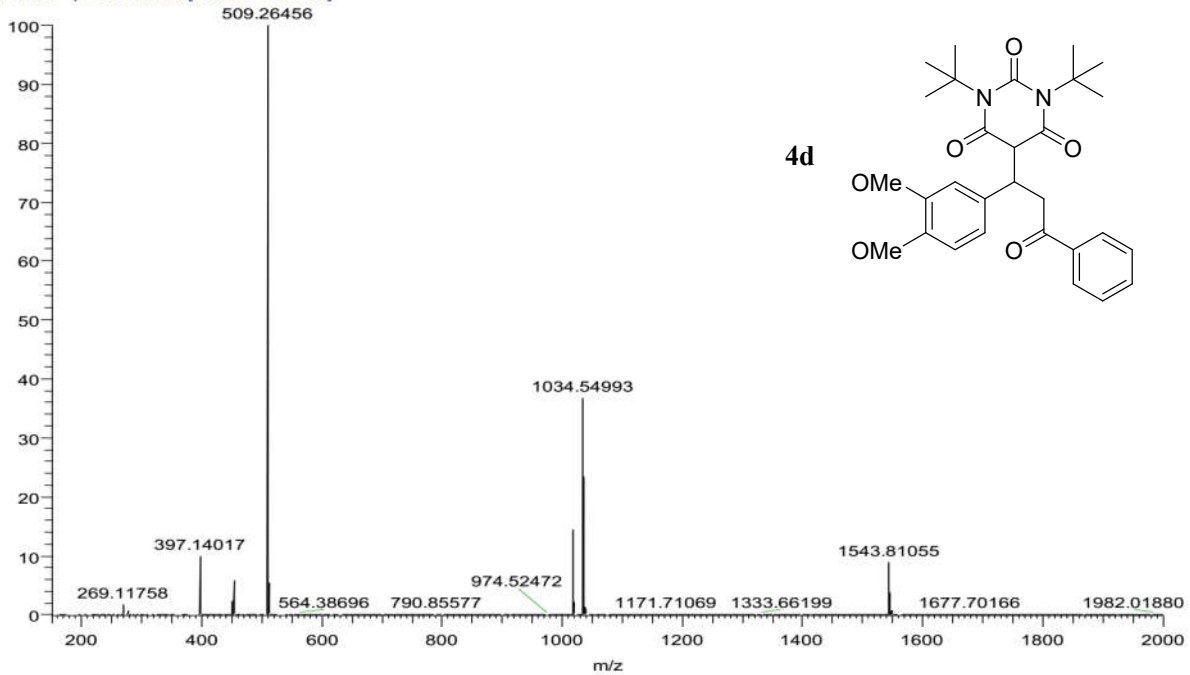

**LY-2-89:** HRMS (ESI)  $m/z$  calcd for  $C_{27}H_{32}FN_2O_4^+$  (M+H)<sup>+</sup> 467.23406, found

467.23398.

00158 #8 RT: 0.12 AV: 1 NL: 8.13E6  
T: FTMS + p ESI Full ms [150.00-2000.00]

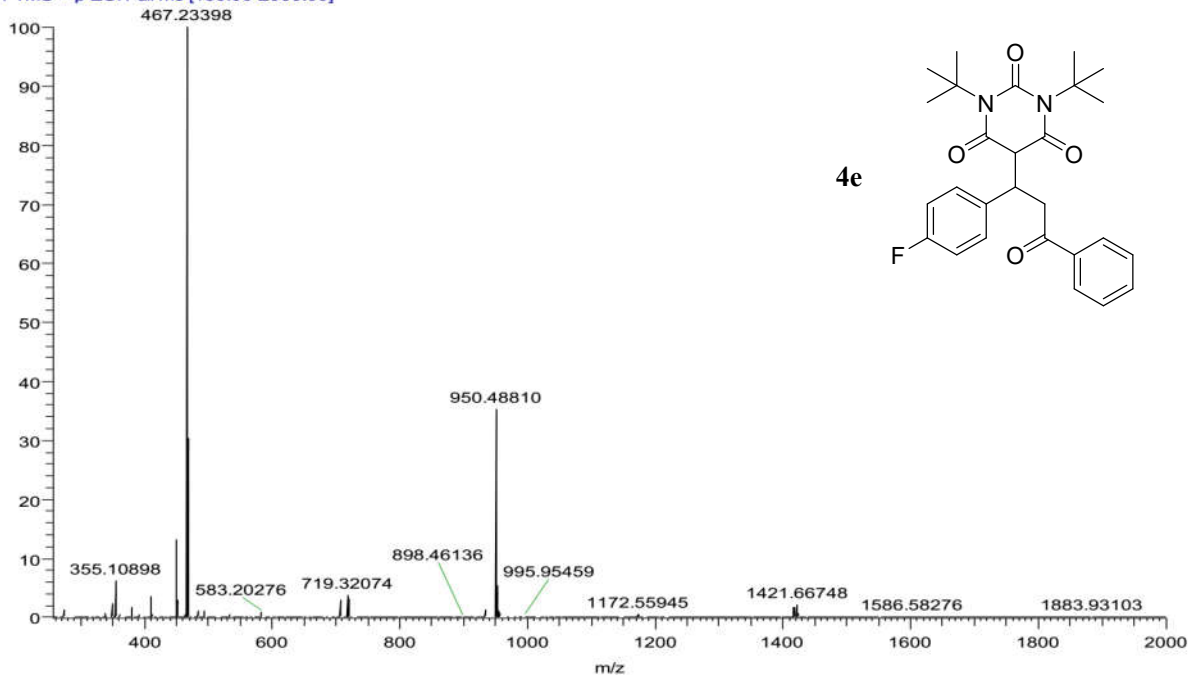

**LY-2-87:** HRMS (ESI)  $m/z$  calcd for  $C_{27}H_{32}ClN_2O_4^+$  (M+H)<sup>+</sup> 483.20451, found 483.20456.

00158 #11 RT: 0.15 AV: 1 NL: 2.63E7  
T: FTMS + p ESI Full ms [150.00-2000.00]

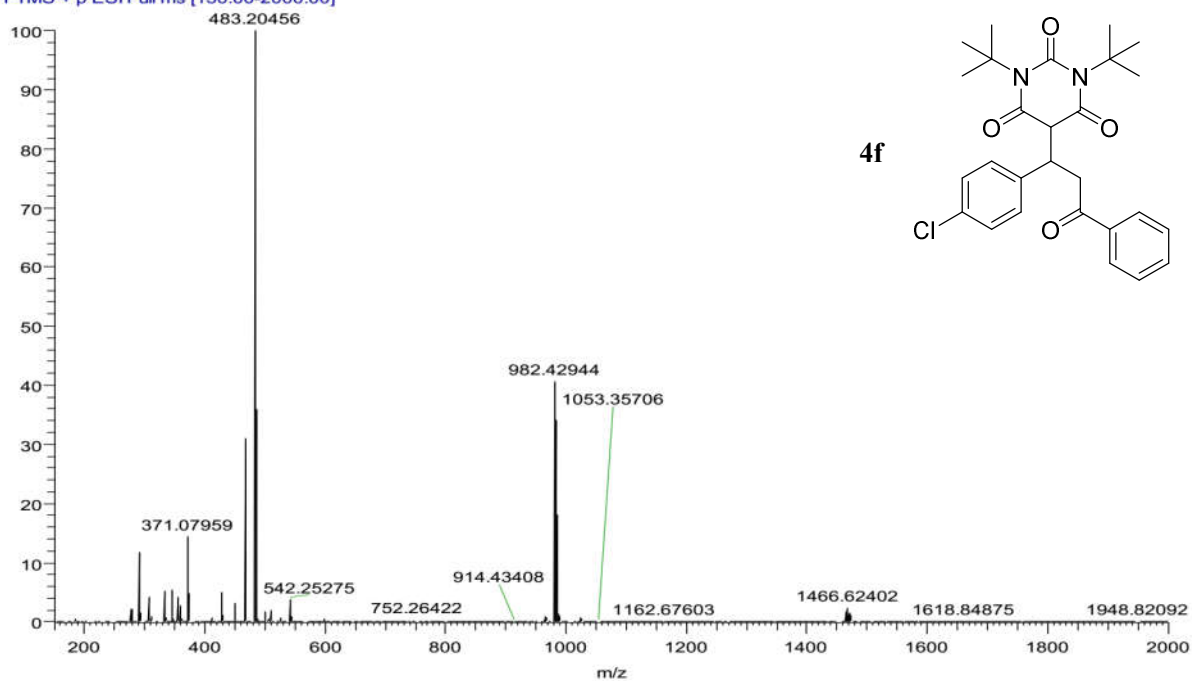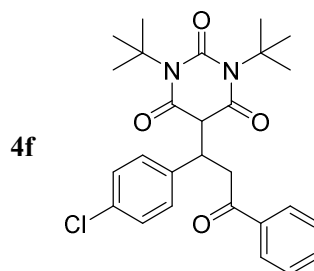

**LY-3-13-1:** HRMS (ESI)  $m/z$  calcd for  $C_{27}H_{32}ClN_2O_4^+$  (M+H)<sup>+</sup> 483.20451, found 483.20444.

00141 #12 RT: 0.19 AV: 1 NL: 5.00E6  
T: FTMS + p ESI Full ms [150.00-2000.00]

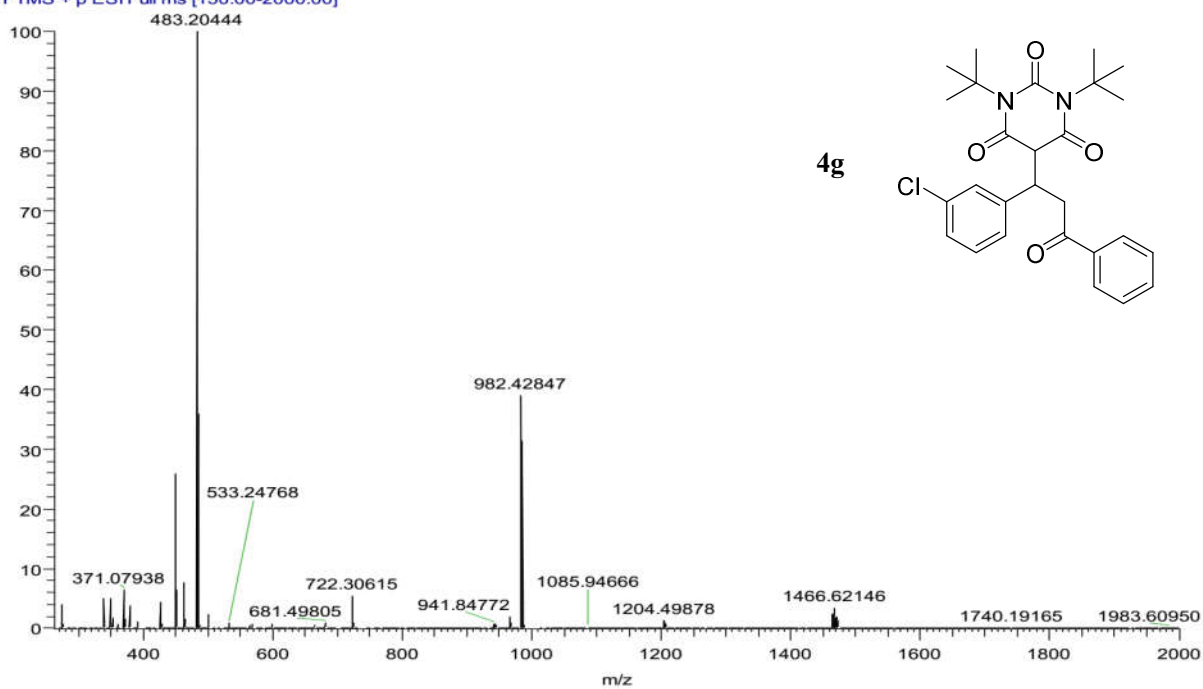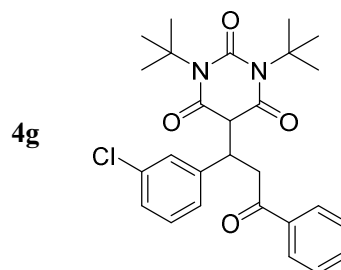

**LY-3-13-2:** HRMS (ESI) m/z calcd for C<sub>27</sub>H<sub>32</sub>ClN<sub>2</sub>O<sub>4</sub><sup>+</sup> (M+H)<sup>+</sup> 483.20451, found 483.20438.

00156 #12 RT: 0.18 AV: 1 NL: 5.70E6  
T: FTMS + p ESI Full ms [150.00-2000.00]

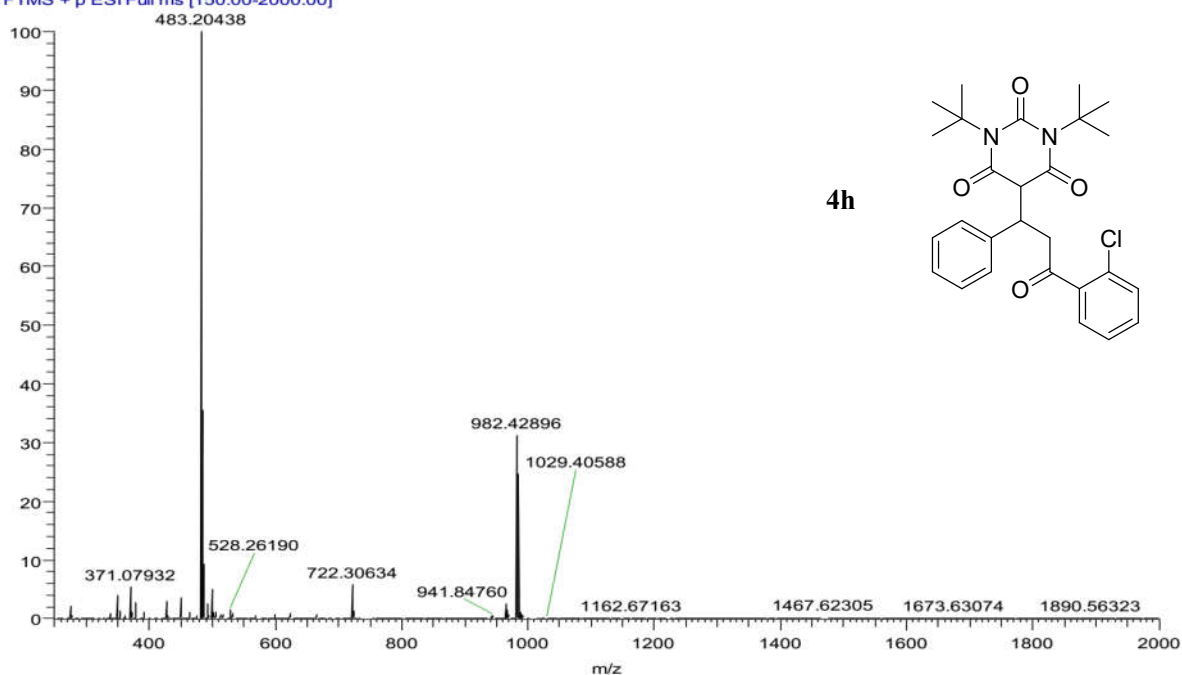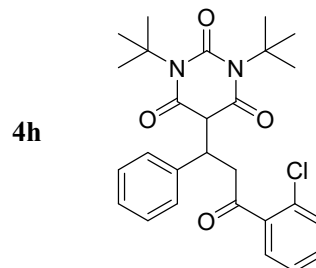

**LY-3-10-1:** HRMS (ESI) m/z calcd for C<sub>28</sub>H<sub>32</sub>N<sub>3</sub>O<sub>4</sub><sup>+</sup> (M+H)<sup>+</sup> 474.23873, found 474.23862.

00137 #7 RT: 0.12 AV: 1 NL: 1.37E6  
T: FTMS + p ESI Full ms [150.00-2000.00]

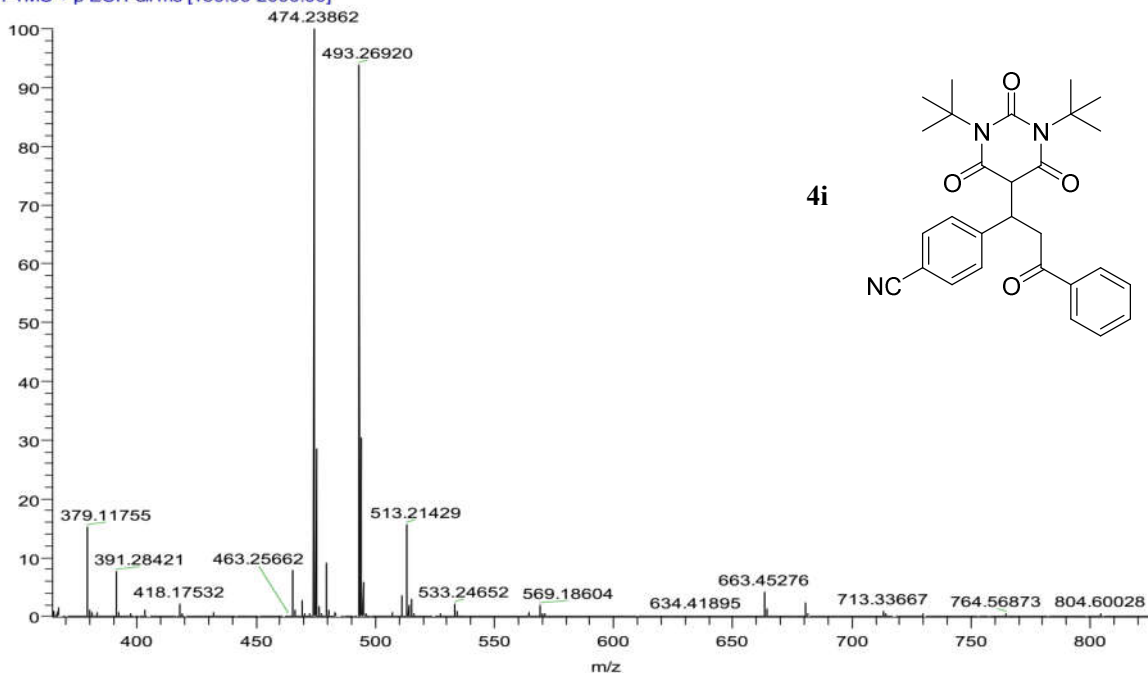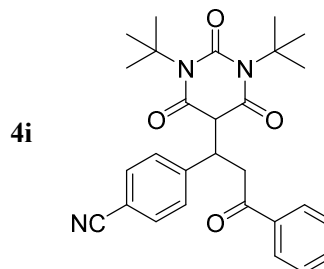

**LY-2-90:** HRMS (ESI)  $m/z$  calcd for  $C_{27}H_{32}N_3O_6^+$  (M+H)<sup>+</sup> 494.22856, found 494.22836.

00150 #9 RT: 0.16 AV: 1 NL: 1.30E6  
T: FTMS + p ESI Full ms [150.00-2000.00]

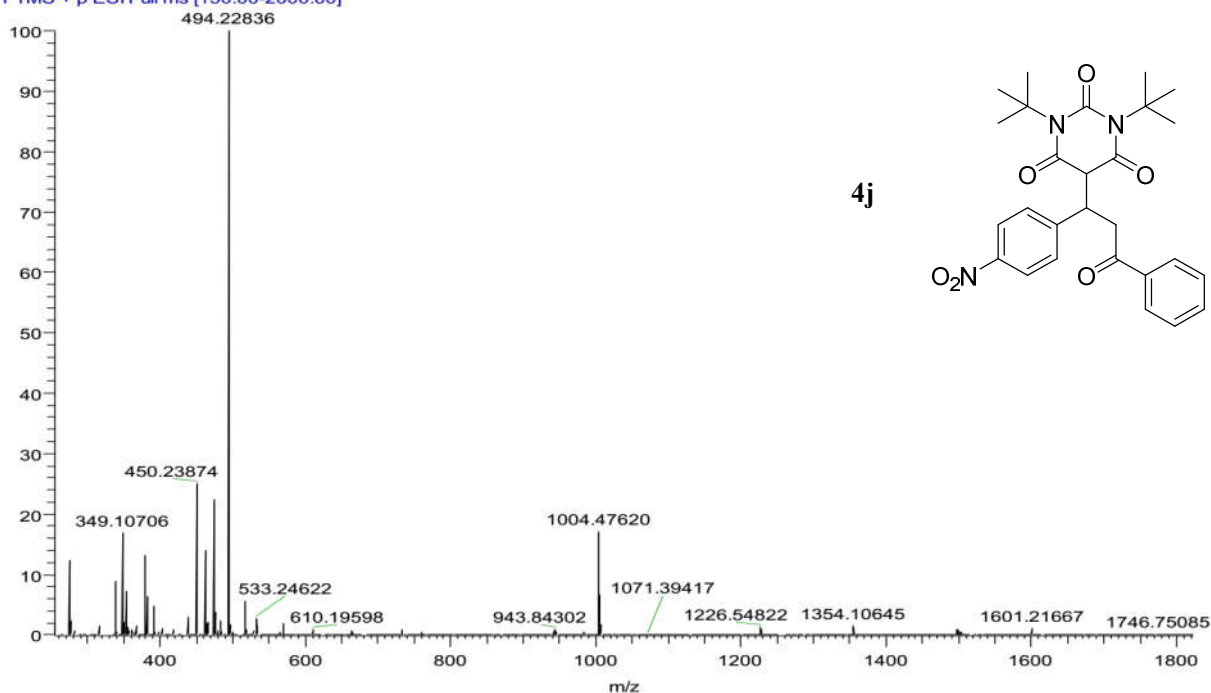

**LY-2-91:** HRMS (ESI)  $m/z$  calcd for  $C_{27}H_{32}N_3O_6^+$  (M+H)<sup>+</sup> 494.22856, found 494.22849.

00154 #4 RT: 0.06 AV: 1 NL: 4.29E6  
T: FTMS + p ESI Full ms [150.00-2000.00]

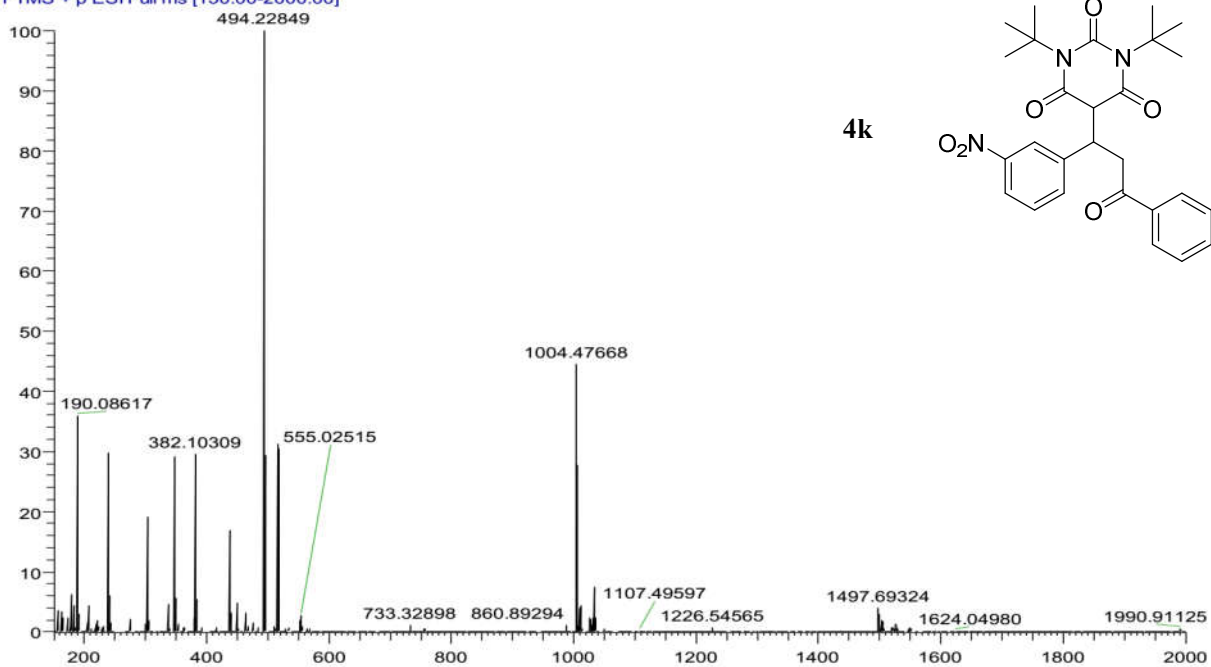

**LY-3-10-2:** HRMS (ESI)  $m/z$  calcd for  $C_{28}H_{32}F_3N_2O_4^+$  ( $M+H$ )<sup>+</sup> 517.23087, found 517.23047.

00142 #7 RT: 0.10 AV: 1 NL: 7.46E6  
T: FTMS + p ESI Full ms [150.00-2000.00]

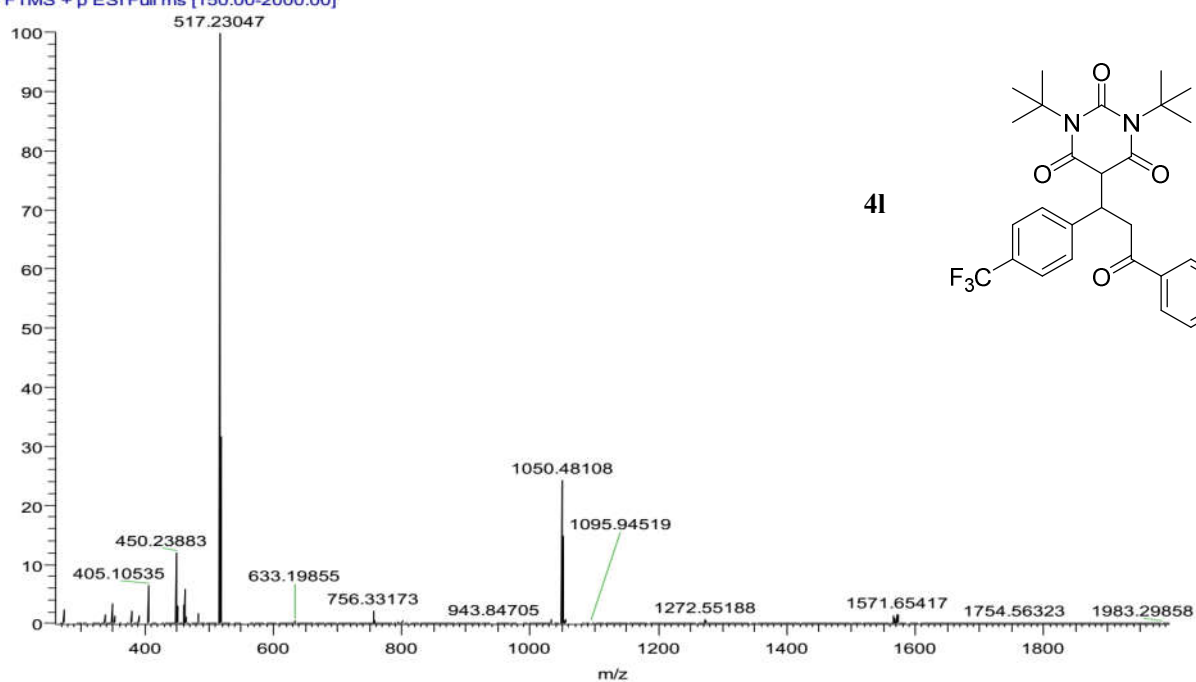

4l

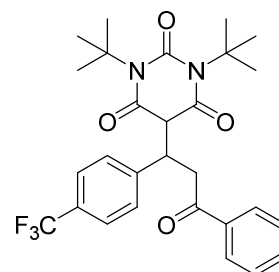

**LY-3-2:** HRMS (ESI)  $m/z$  calcd for  $C_{31}H_{35}N_2O_4^+$  ( $M+H$ )<sup>+</sup> 499.25913, found 499.25903.

00146 #7 RT: 0.10 AV: 1 NL: 8.58E6  
T: FTMS + p ESI Full ms [150.00-2000.00]

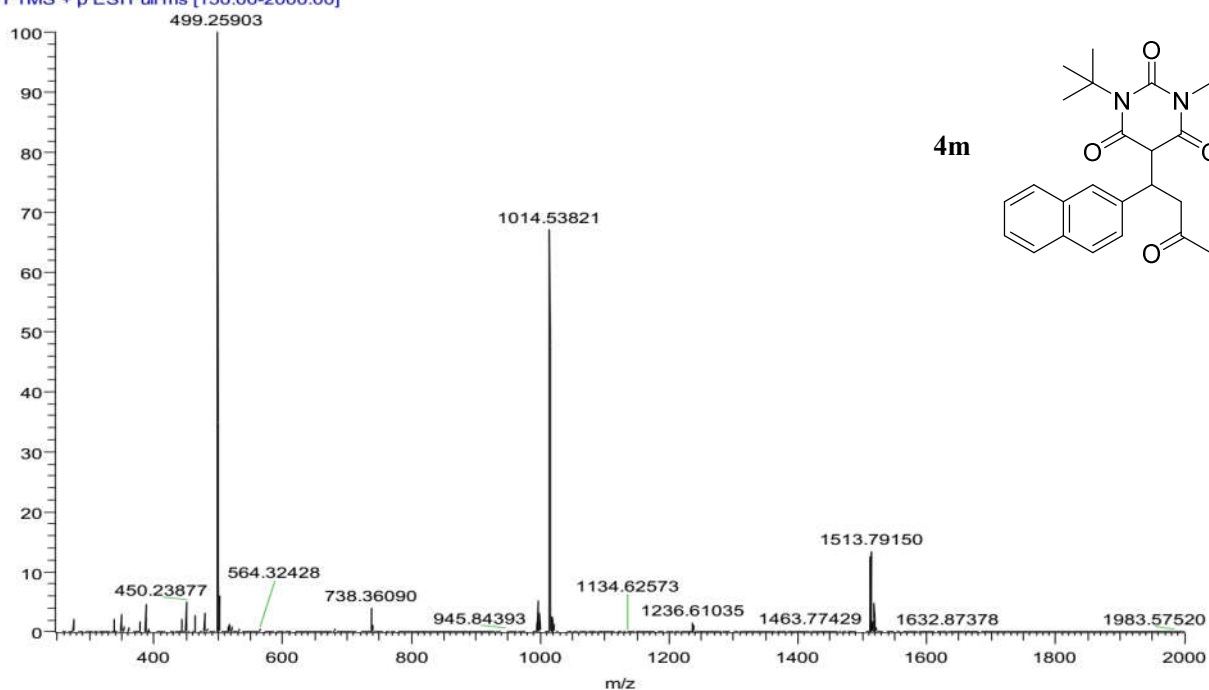

4m

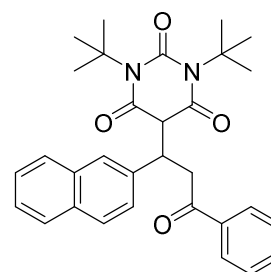

**LY-3-7:** HRMS (ESI)  $m/z$  calcd for  $C_{28}H_{35}N_2O_4^+$  ( $M+H$ ) $^+$  463.25913, found 463.25900.

00139 #11 RT: 0.16 AV: 1 NL: 1.86E7  
T: FTMS + p ESI Full ms [150.00-2000.00]

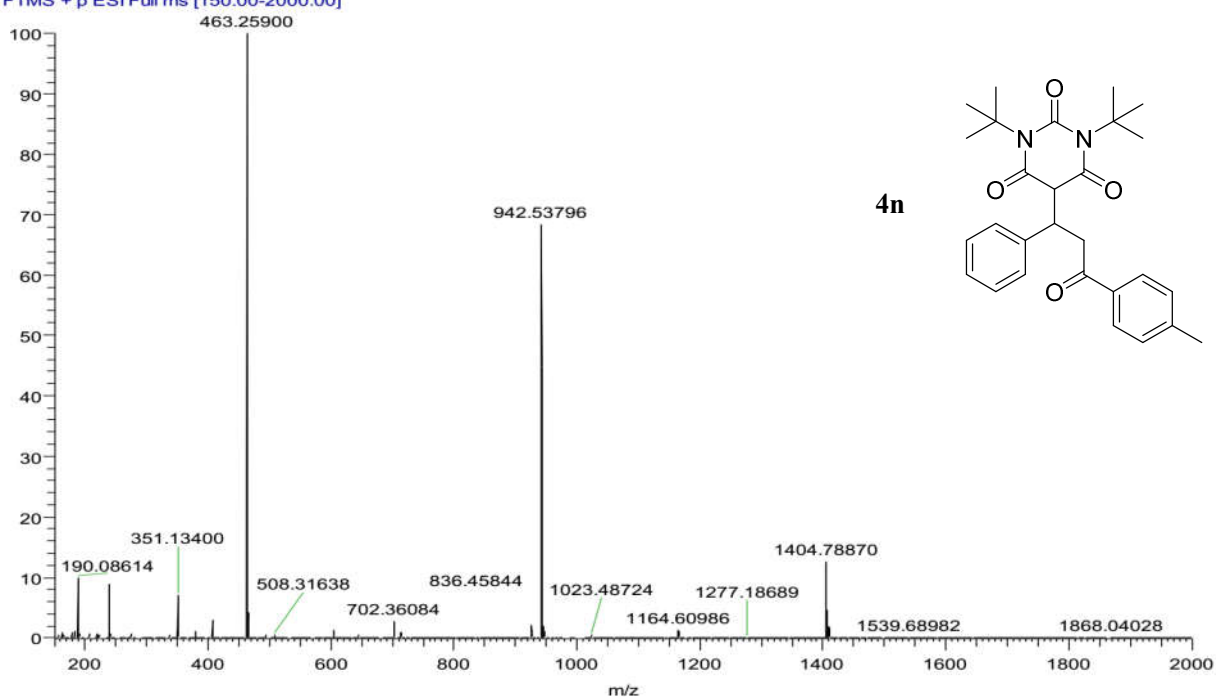

**LY-2-86:** HRMS (ESI)  $m/z$  calcd for  $C_{27}H_{32}FN_2O_4^+$  ( $M+H$ ) $^+$  467.23406, found 467.23413.

00157 #19 RT: 0.31 AV: 1 NL: 6.47E7  
T: FTMS + p ESI Full ms [150.00-2000.00]

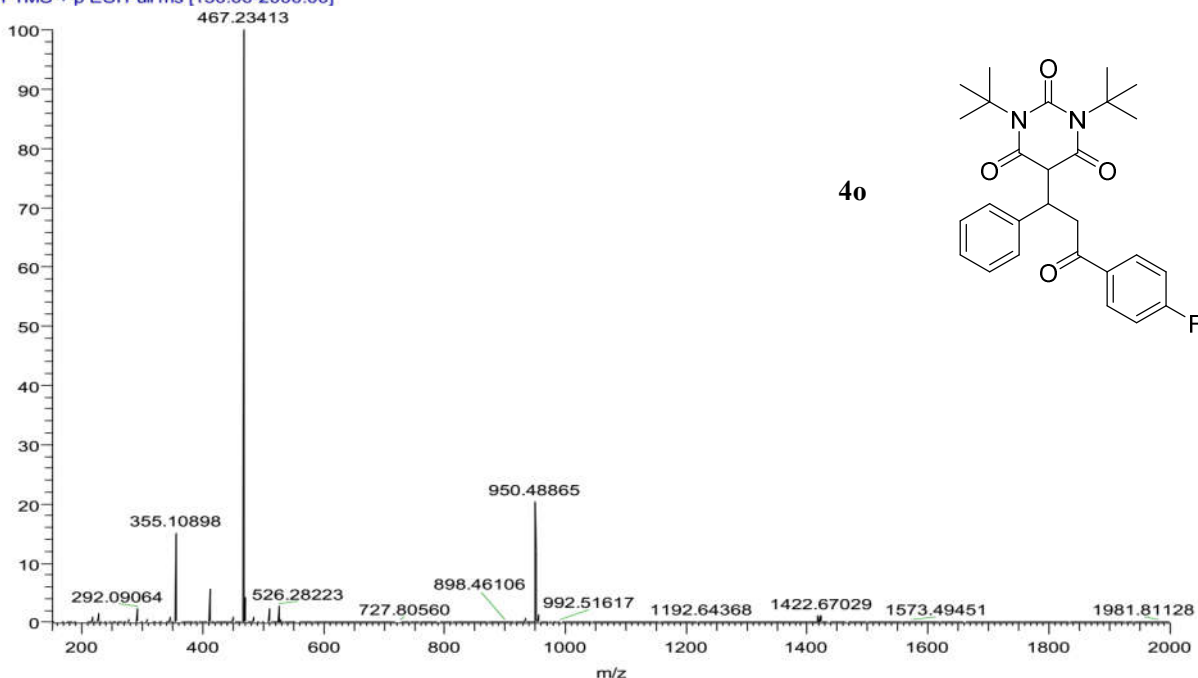

**LY-3-12-1:** HRMS (ESI)  $m/z$  calcd for  $C_{27}H_{32}BrN_2O_4^+$  (M+H)<sup>+</sup> 527.15400, found 527.15399.

00147 #7 RT: 0.11 AV: 1 NL: 7.91E6  
T: FTMS + p ESI Full ms [150.00-2000.00]

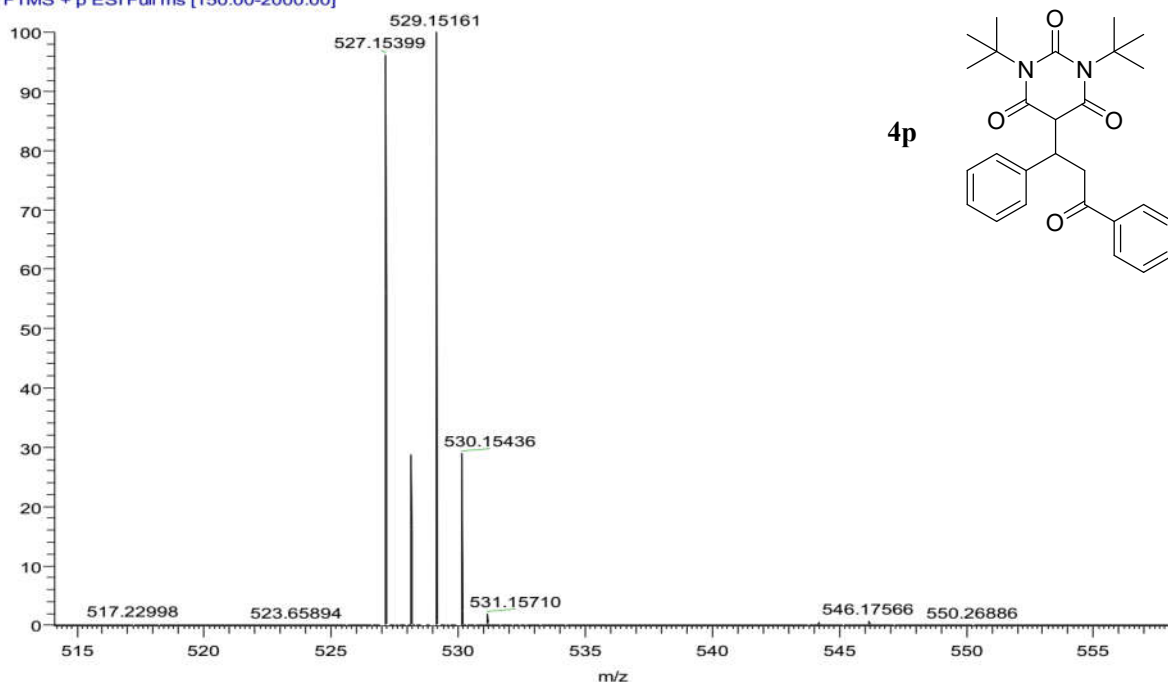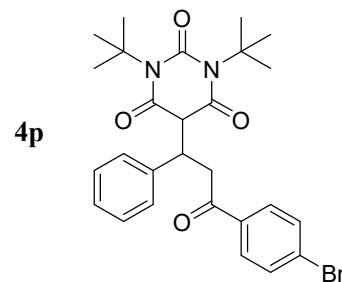

**LY-3-4:** HRMS (ESI)  $m/z$  calcd for  $C_{31}H_{35}N_2O_4^+$  (M+H)<sup>+</sup> 499.25913, found 499.25900.

00144 #7 RT: 0.11 AV: 1 NL: 2.02E7  
T: FTMS + p ESI Full ms [150.00-2000.00]

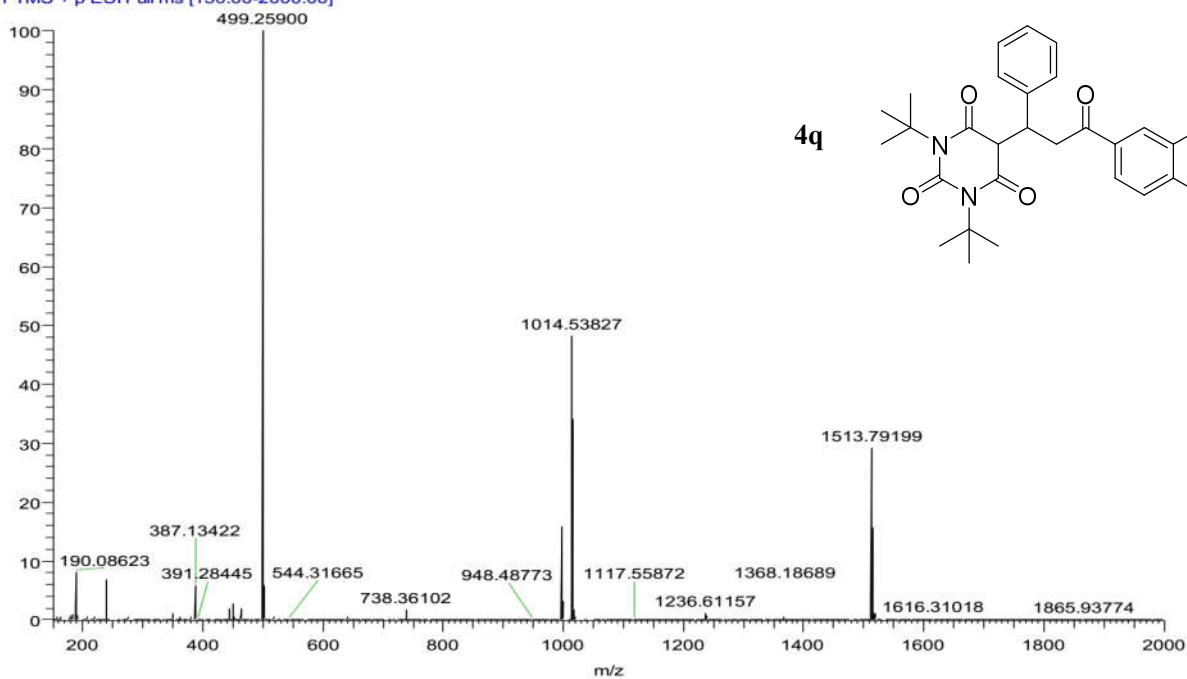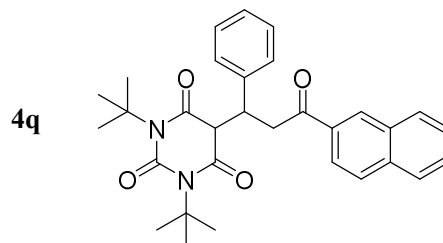



**LY-2-96:** HRMS (ESI) m/z calcd for  $C_{27}H_{33}N_2O_5^+$  (M+H)<sup>+</sup> 465.23840, found 465.23843.

00135\_170118182251 #13 RT: 0.20 AV: 1 NL: 3.33E6  
T: FTMS + p ESI Full ms [150.00-2000.00]

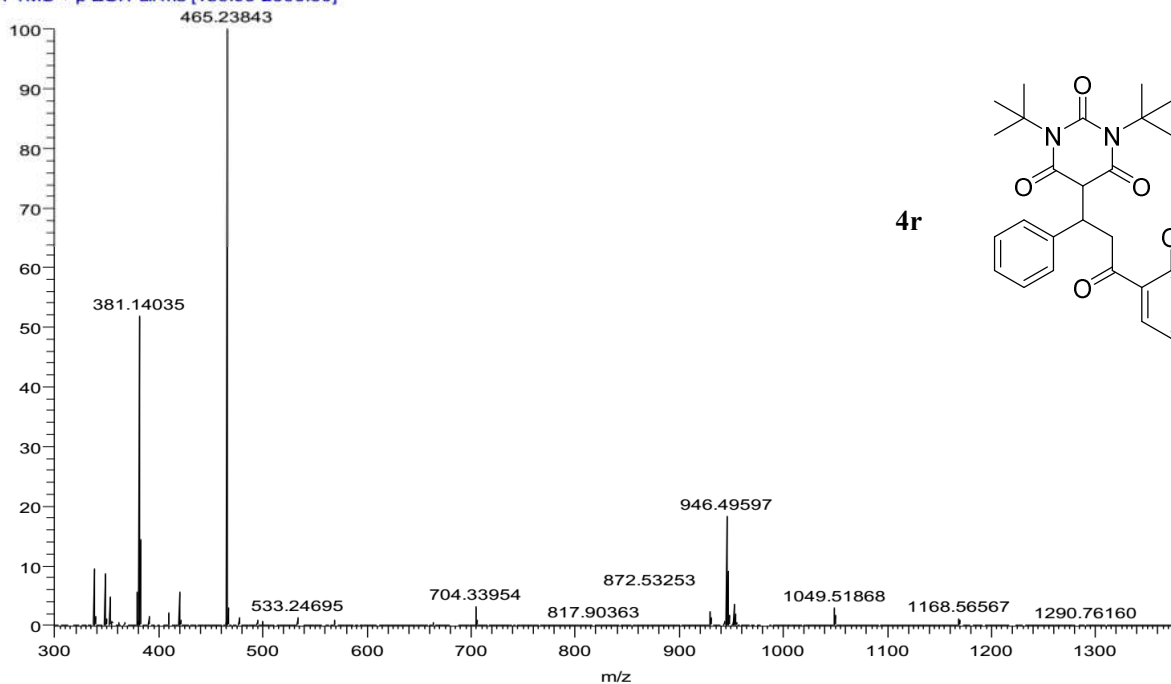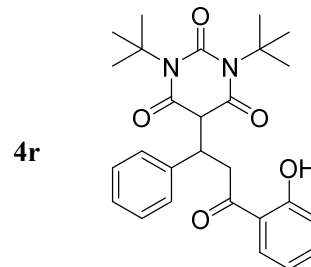

**LY-3-3:** HRMS (ESI) m/z calcd for  $C_{26}H_{32}N_3O_4^+$  (M+H)<sup>+</sup> 450.23873, found 450.23846.

00140 #15 RT: 0.24 AV: 1 NL: 7.57E6  
T: FTMS + p ESI Full ms [150.00-2000.00]

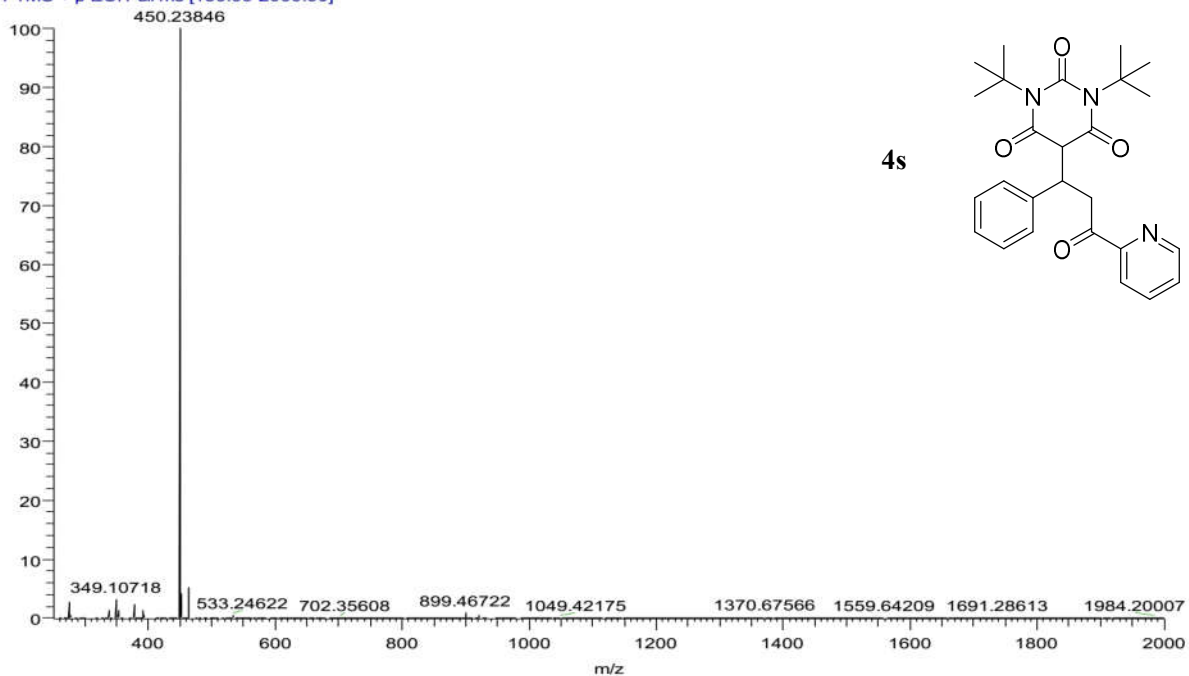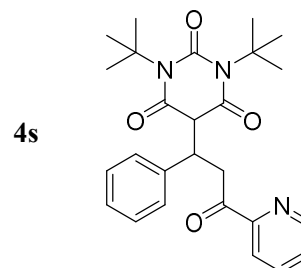

**LY-3-8-1:** HRMS (ESI)  $m/z$  calcd for  $C_{29}H_{37}N_2O_4^+$  (M+H)<sup>+</sup> 477.27478, found

477.27460.

00143 #9 RT: 0.14 AV: 1 NL: 9.69E6  
T: FTMS + p ESI Full ms [150.00-2000.00]

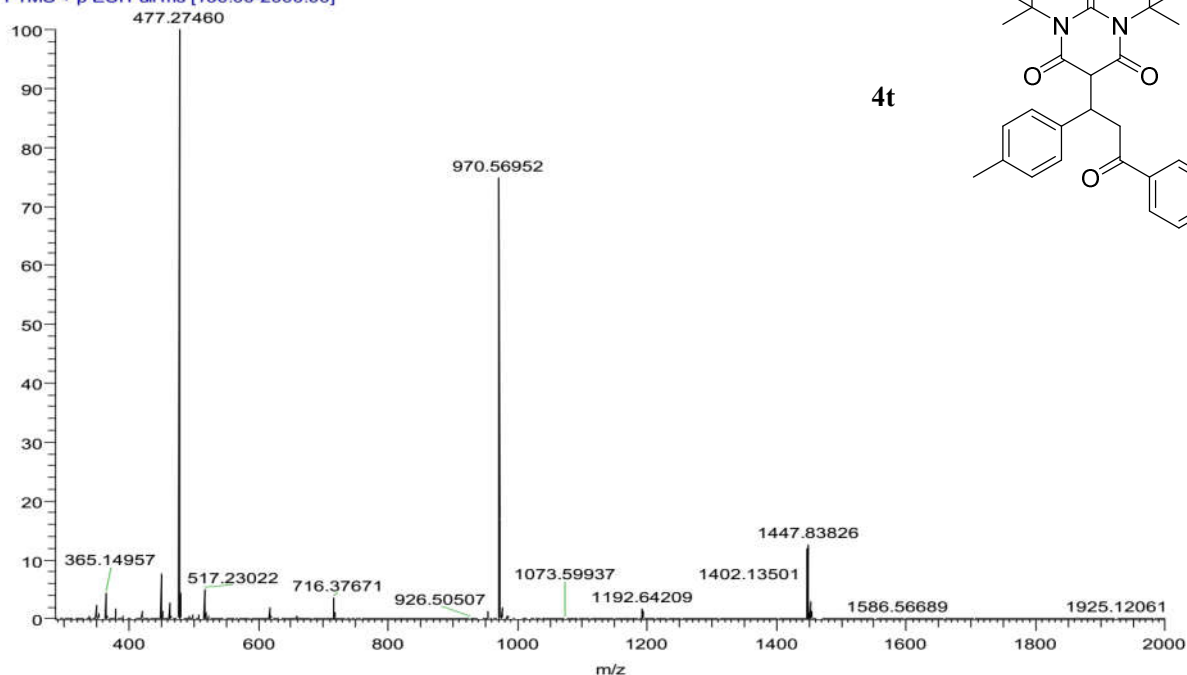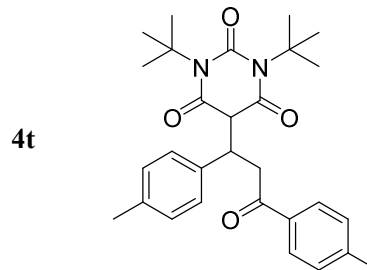

**LY-3-8-2:** HRMS (ESI)  $m/z$  calcd for  $C_{27}H_{31}Cl_2N_2O_4^+$  (M+H)<sup>+</sup> 517.16554, found

517.16547.

00152 #5 RT: 0.09 AV: 1 NL: 5.86E6  
T: FTMS + p ESI Full ms [150.00-2000.00]

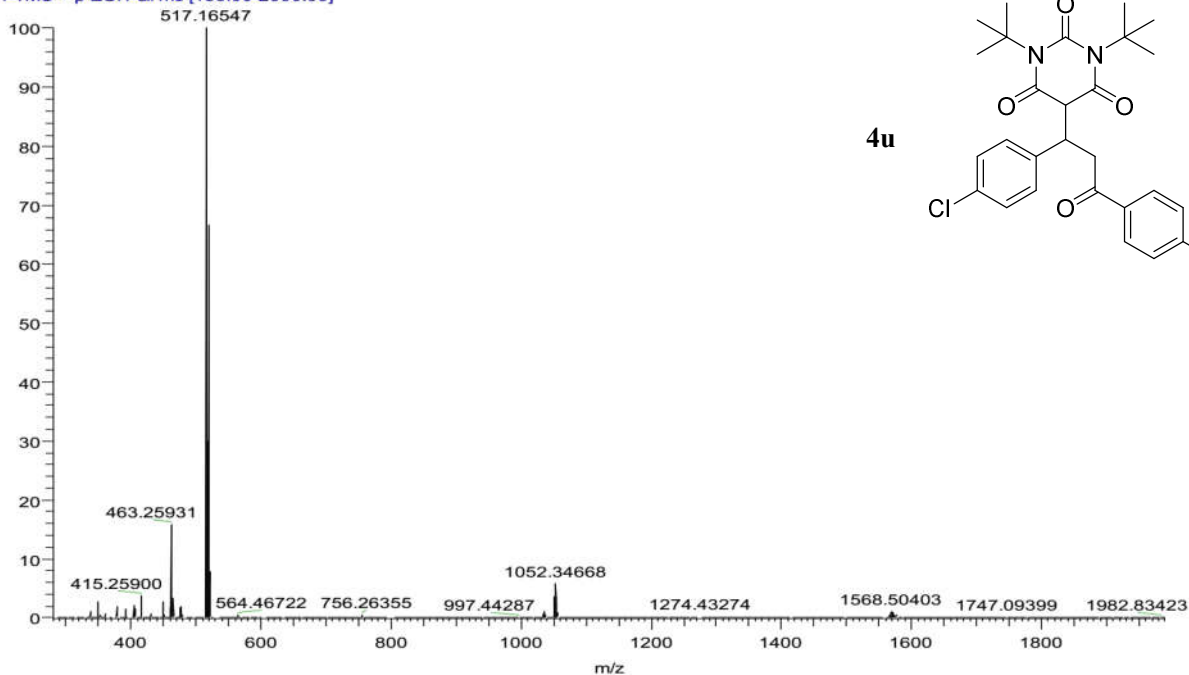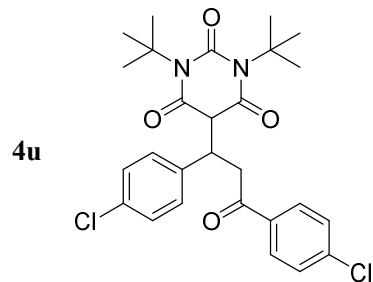

**LY-2-91:** HRMS (ESI)  $m/z$  calcd for  $C_{29}H_{37}N_2O_5^+$  (M+H)<sup>+</sup> 493.26970, found 493.26953.

00155 #11 RT: 0.16 AV: 1 NL: 1.69E7  
T: FTMS + p ESI Full ms [150.00-2000.00]

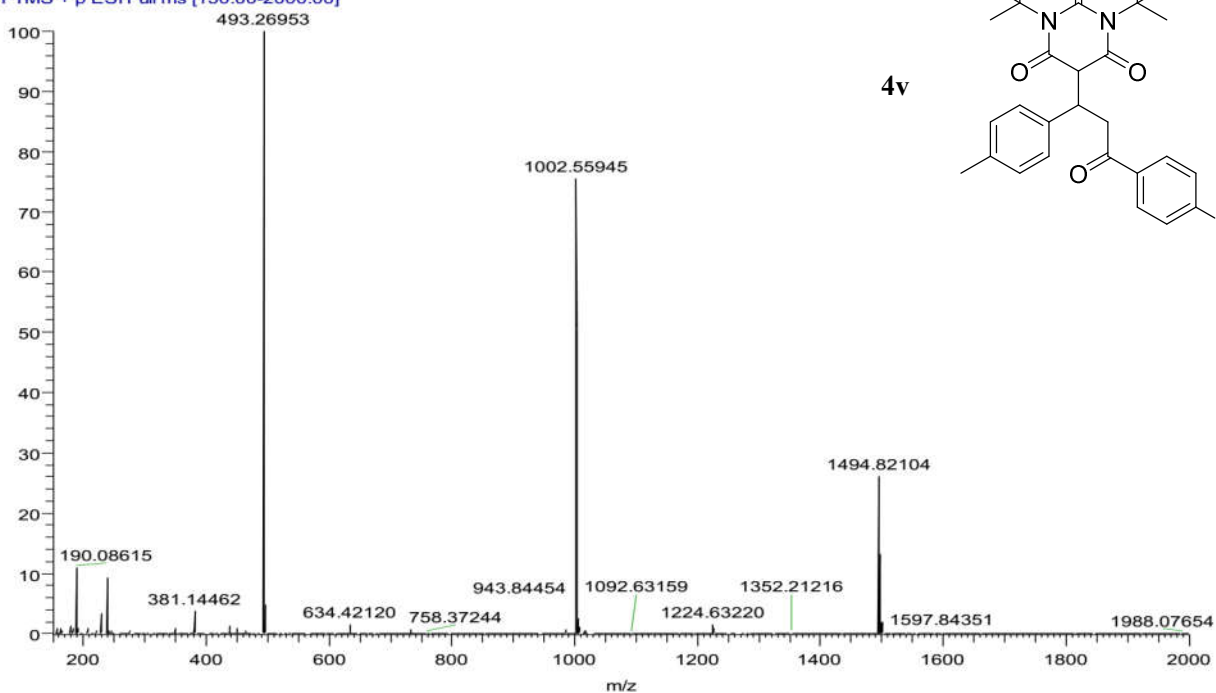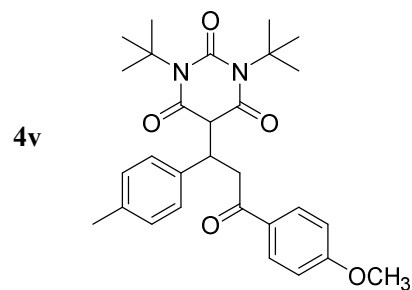

**LY-3-9-1:** HRMS (ESI)  $m/z$  calcd for  $C_{28}H_{34}ClN_2O_4^+$  (M+H)<sup>+</sup> 497.22016, found 497.22018.

00145 #11 RT: 0.17 AV: 1 NL: 5.83E6  
T: FTMS + p ESI Full ms [150.00-2000.00]

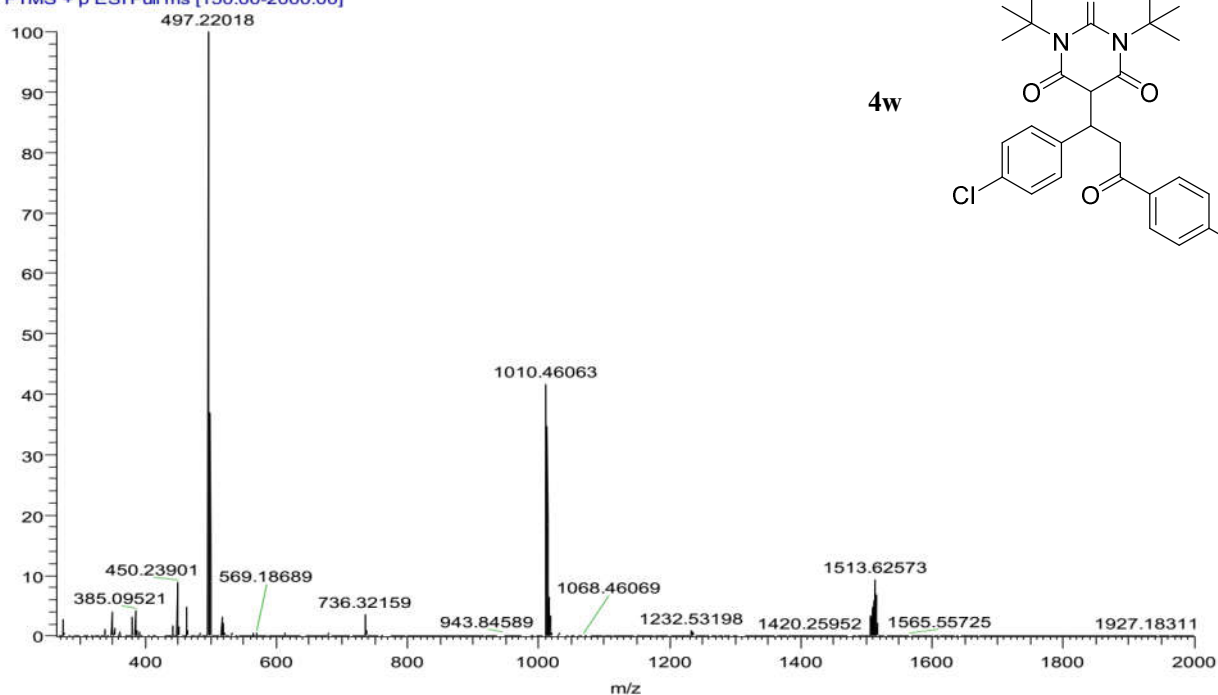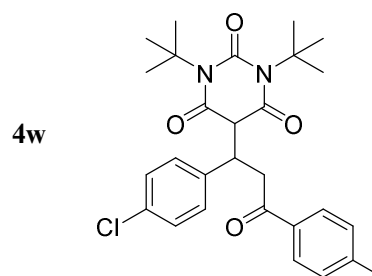

**LY-3-9-2:** HRMS (ESI)  $m/z$  calcd for  $C_{28}H_{34}ClN_2O_5^+$  (M+H)<sup>+</sup> 513.21508, found

513.21490.

00157 #10 RT: 0.15 AV: 1 NL: 3.43E6  
T: FTMS + p ESI Full ms [150.00-2000.00]

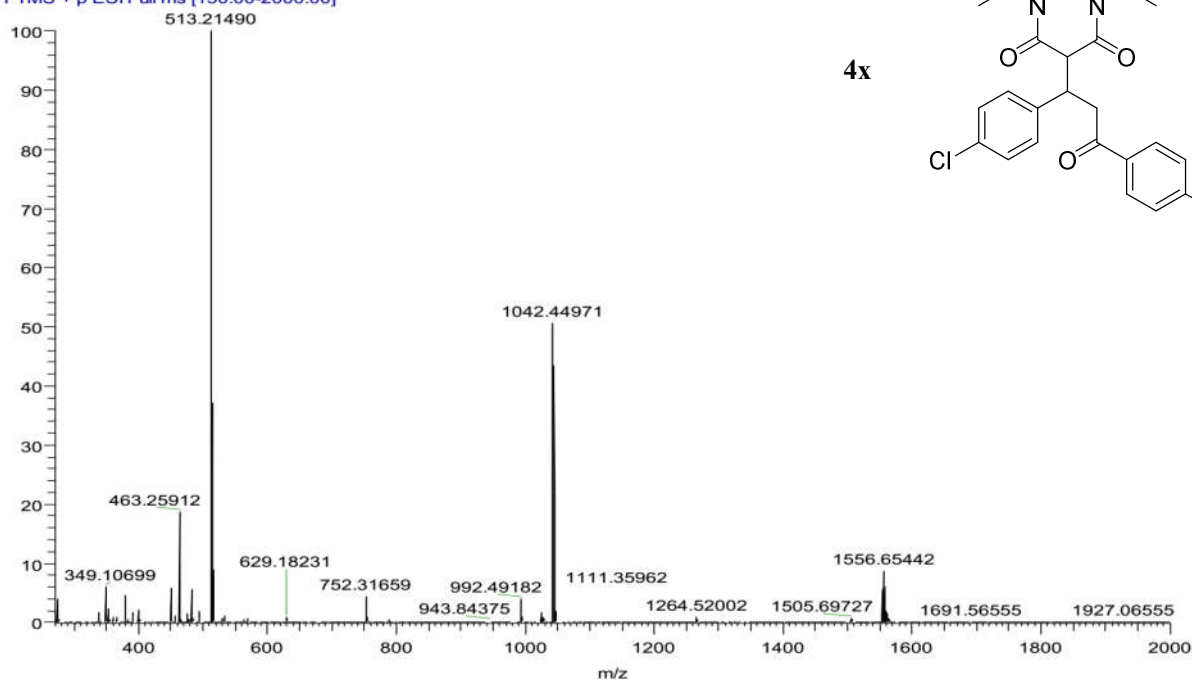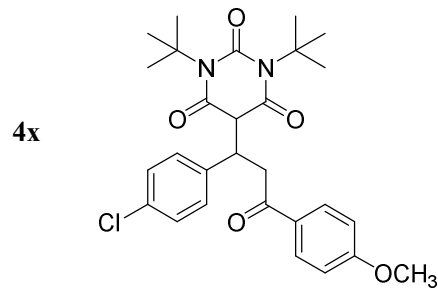

**LY-3-11-1:** HRMS (ESI)  $m/z$  calcd for  $C_{28}H_{34}FN_2O_5^+$  (M+H)<sup>+</sup> 497.24463, found

497.24435.

00138 #10 RT: 0.16 AV: 1 NL: 5.89E6  
T: FTMS + p ESI Full ms [150.00-2000.00]

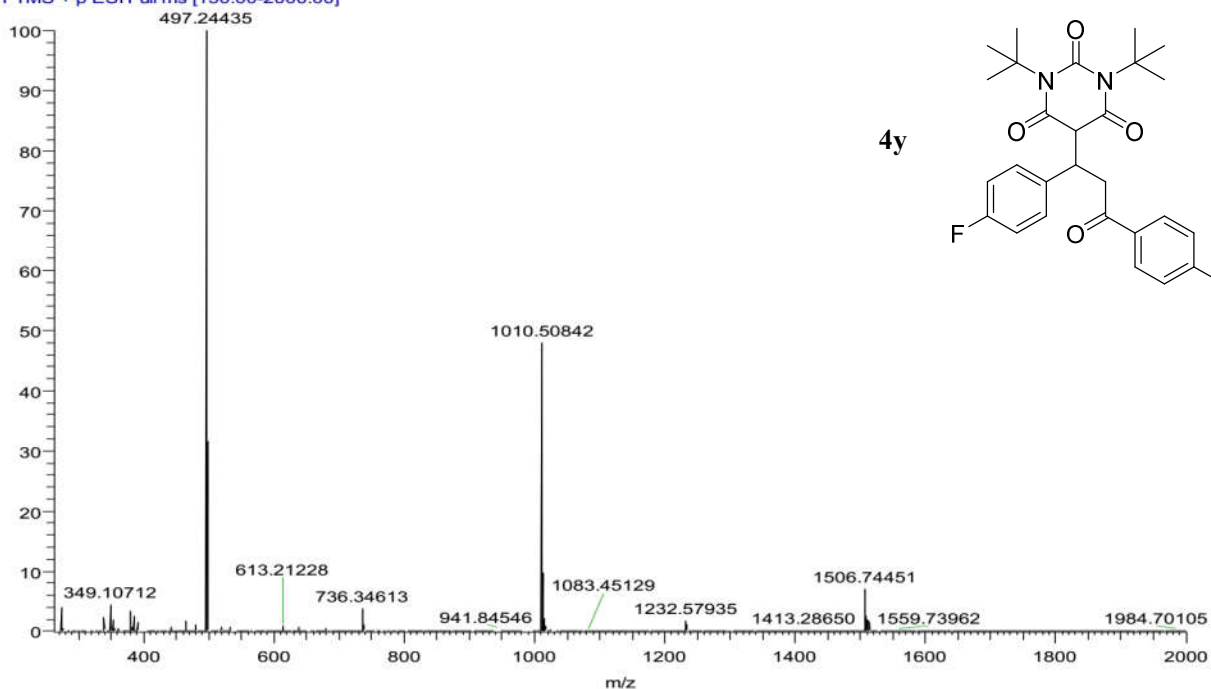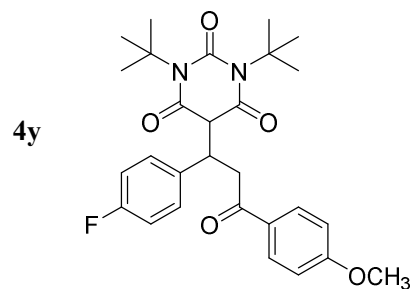

calcd for  $C_{27}H_{31}ClFN_2O_4^+$  (M+H)<sup>+</sup> 501.19509, found 501.19476.

00160 #7 RT: 0.11 AV: 1 NL: 6.54E6

T: FTMS + p ESI Full ms [150.00-2000.00]

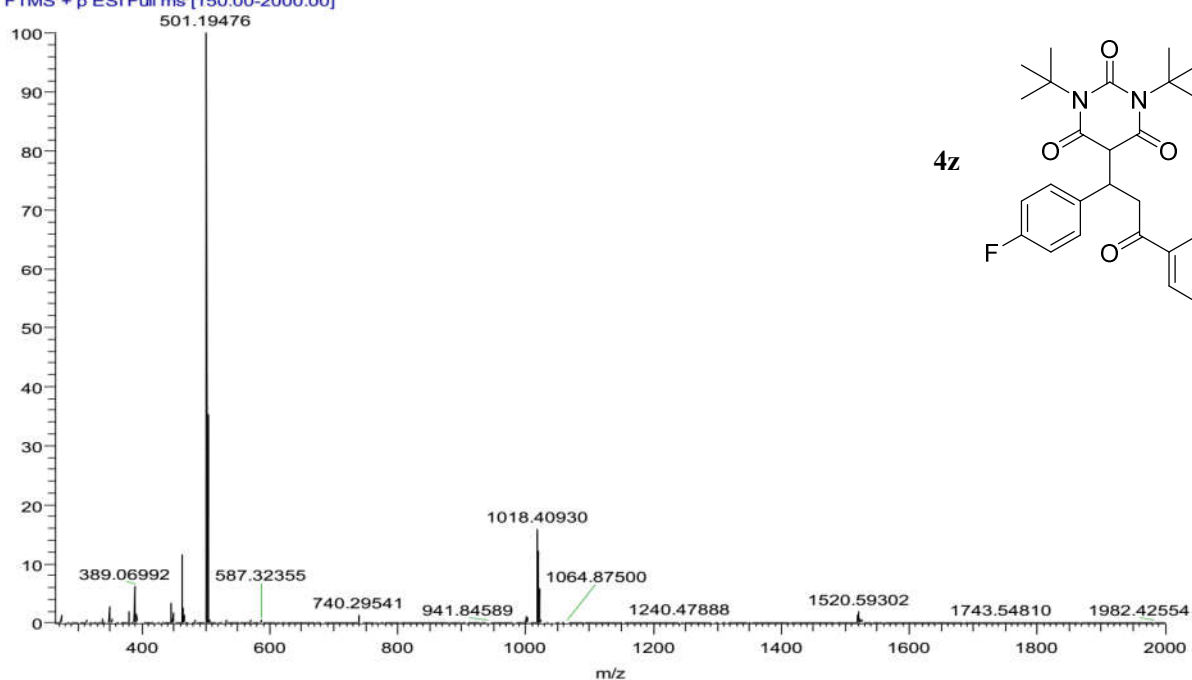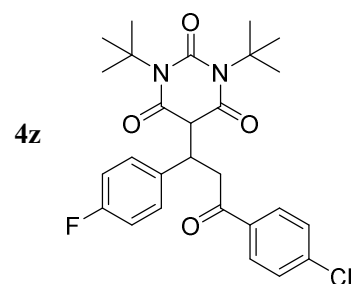

LY-3-33A: HRMS (ESI) m/z calcd for  $C_{24}H_{35}N_2O_4^+$  (M+H)<sup>+</sup> 415.25913, found 415.25912.

00151 #5 RT: 0.07 AV: 1 NL: 1.41E7

T: FTMS + p ESI Full ms [150.00-2000.00]

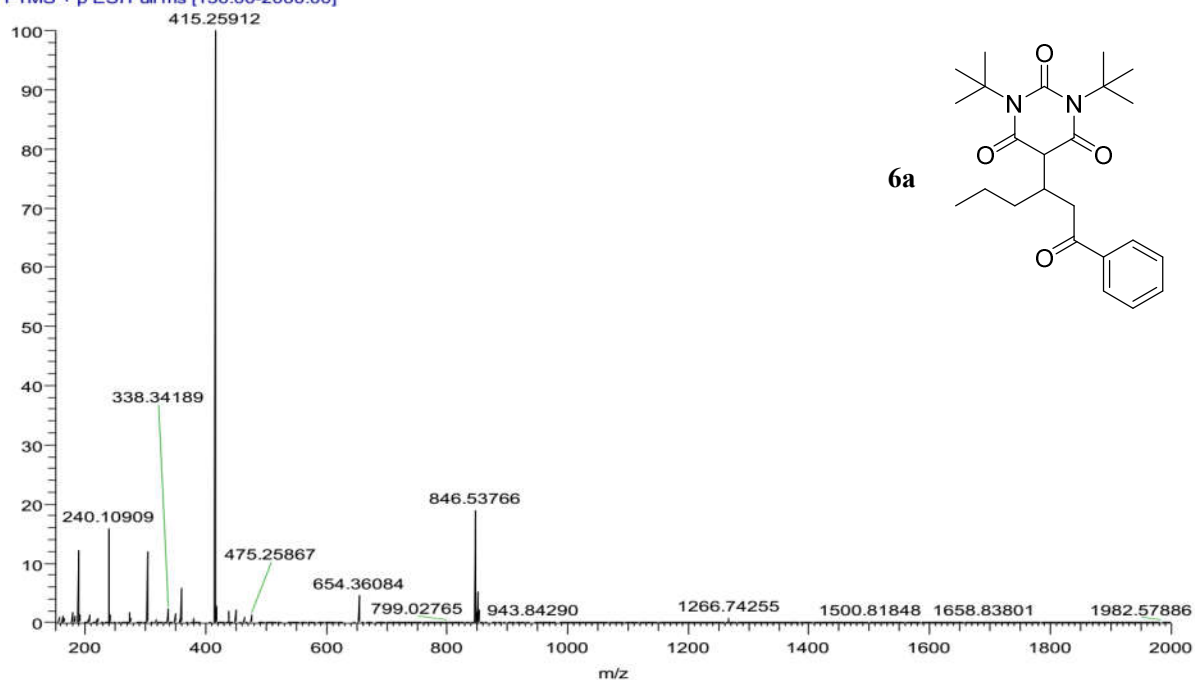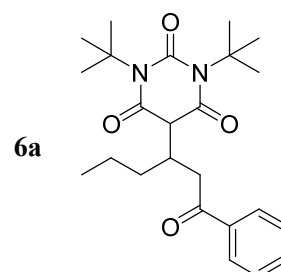

**LY-3-27B:** HRMS (ESI)  $m/z$  calcd for  $C_{27}H_{39}N_2O_4^+$  (M+H)<sup>+</sup> 455.29043, found 455.29041.

00161 #14 RT: 0.22 AV: 1 NL: 2.57E6  
T: FTMS + p ESI Full ms [150.00-2000.00]

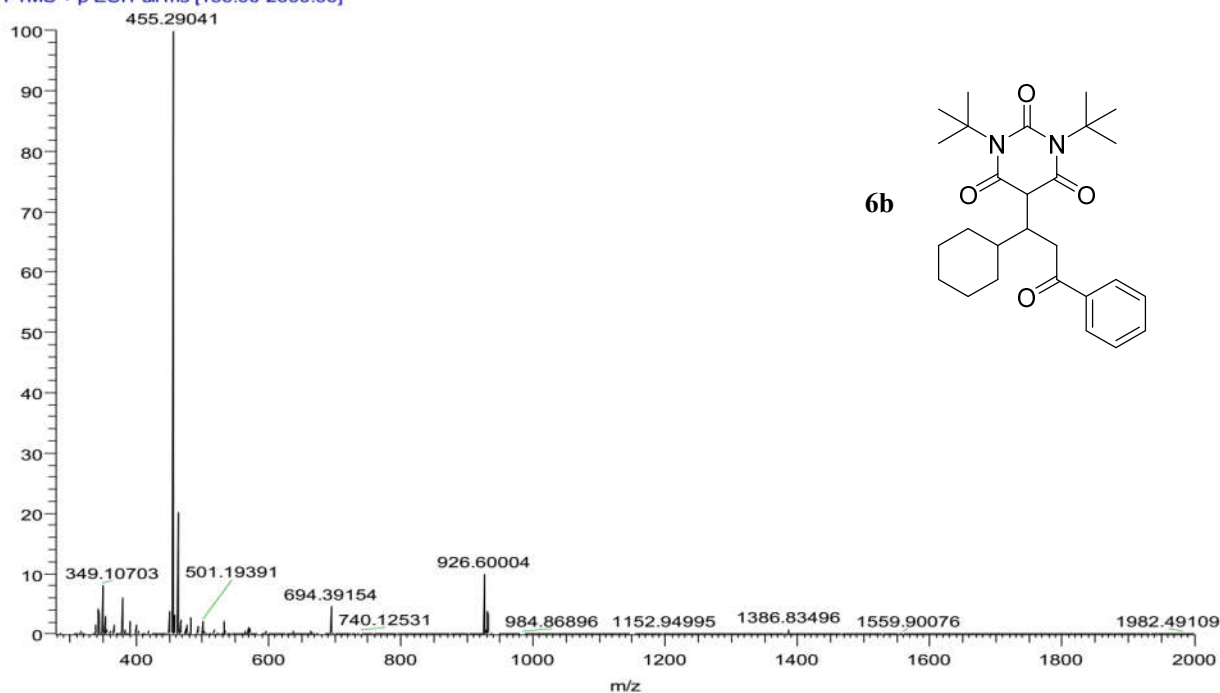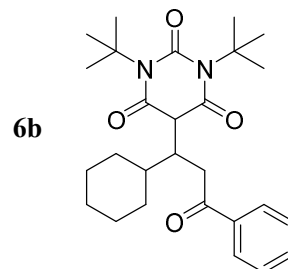

**LY-3-37:** HRMS (ESI)  $m/z$  calcd for  $C_{29}H_{37}N_2O_4^+$  (M+H)<sup>+</sup> 477.27478, found 477.27460.

00162 #10 RT: 0.16 AV: 1 NL: 8.33E6  
T: FTMS + p ESI Full ms [150.00-2000.00]

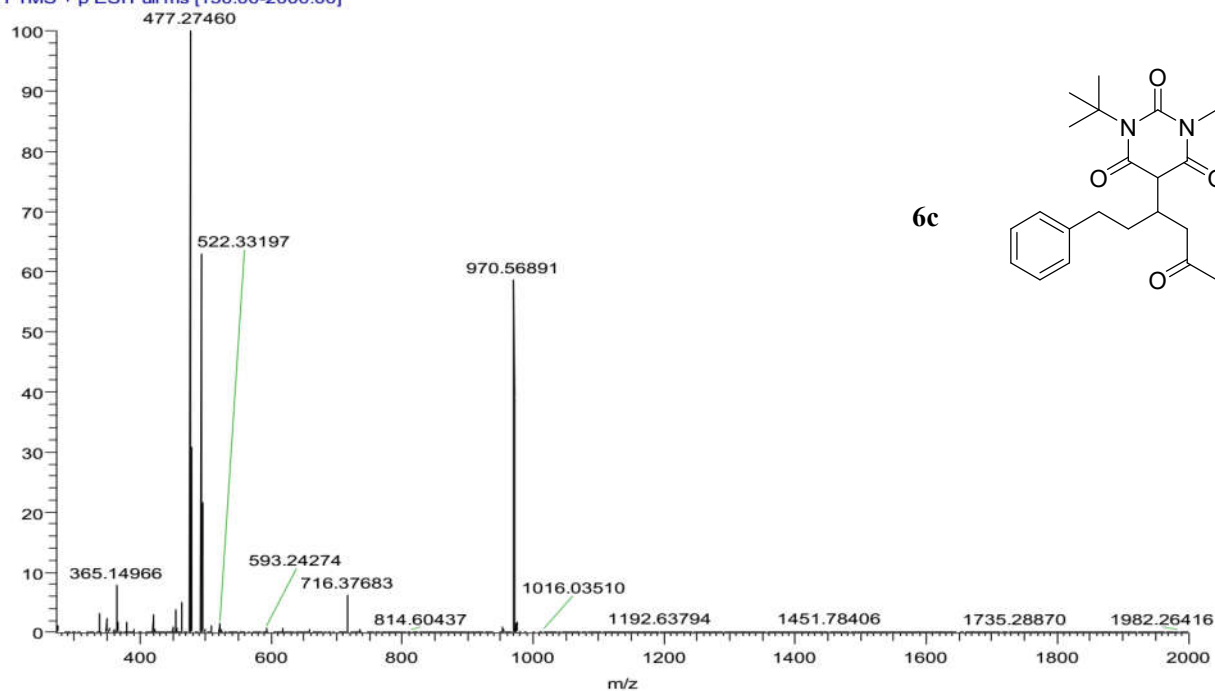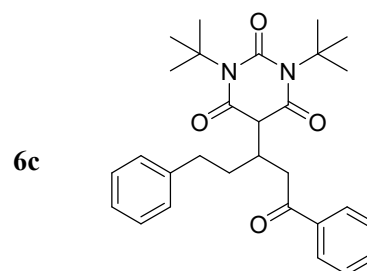

**LY-3-21A:** HRMS (ESI)  $m/z$  calcd for  $C_{17}H_{27}N_2O_4^+$  (M+H)<sup>+</sup> 323.19653, found 323.19653.

00148 #3 RT: 0.05 AV: 1 NL: 3.08E5  
T: FTMS + p ESI Full ms [150.00-2000.00]

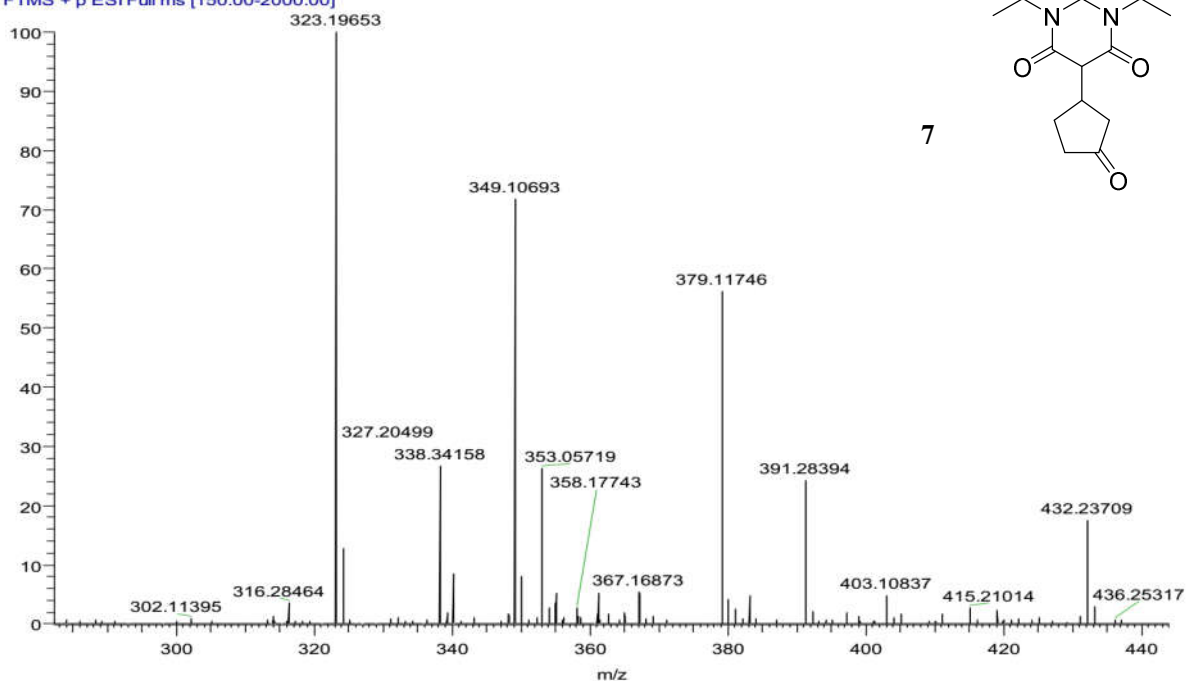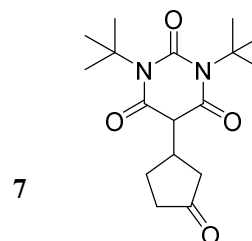

**Ly-3-76:** HRMS (ESI)  $m/z$  calcd for  $C_{28}H_{35}N_2O_4^+$  (M+H)<sup>+</sup> 463.25913, found 463.25928.

70 #7 RT: 0.12 AV: 1 NL: 4.83E6  
T: FTMS + p ESI Full ms [150.00-2000.00]

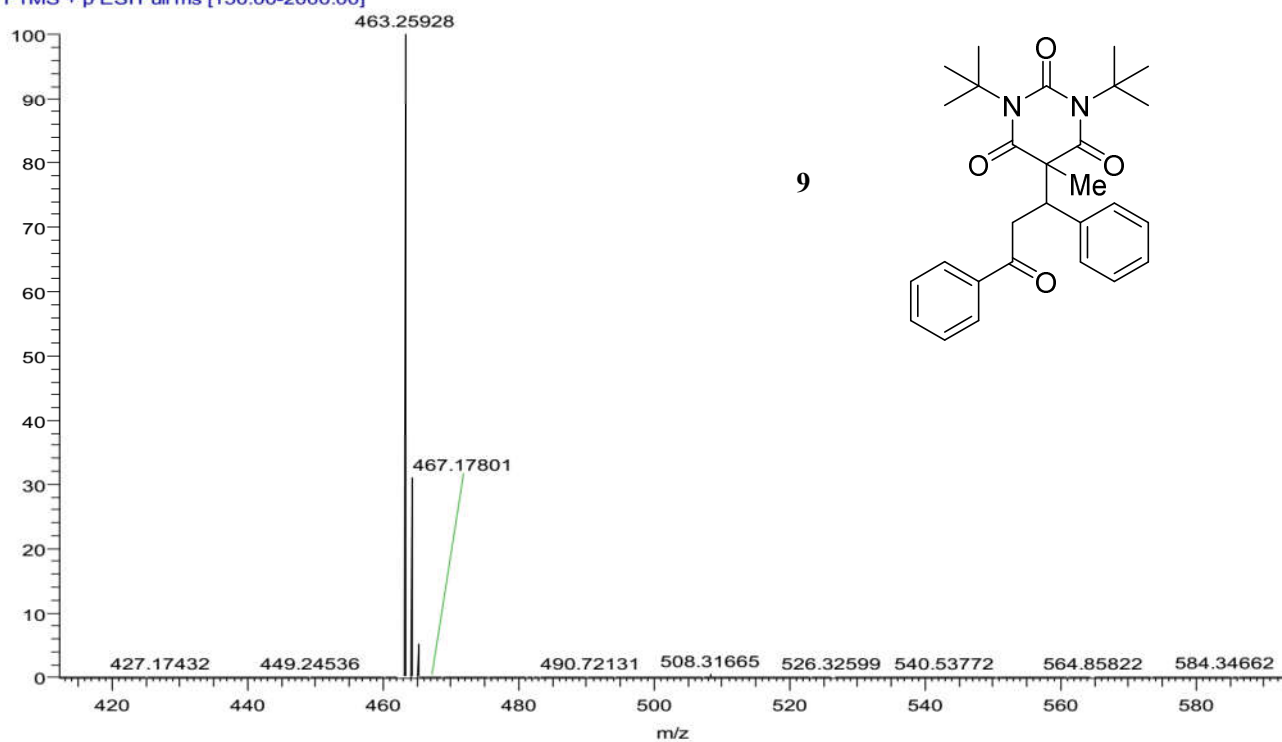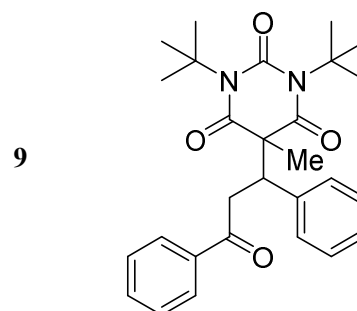

Supplement: c7ob02116j1.pdf [file c7ob02116j1.pdf]
